# Supplementary material for: Pseudomonas aeruginosa Quorum-Sensing and Type VI Secretion System Can Direct Interspecific Coexistence During Evolution
Source: Front Microbiol. 2018 Oct 11;9:2287. doi: 10.3389/fmicb.2018.02287 (PMC6193480; doi:10.3389/fmicb.2018.02287)
Supplement: Supplementary file 3 [file Table_3.XLSX]

## Sheet: Sheet1
Supplementary Dataset 3. Differentially expressed genes of P. aeruginosa between different culture conditions. 3 Mixture, co-culture of P. aeruginosa, K. pneumoniae and S. aureus
for 21 days. PASA, co-culture of P. aeruginosa and S. aureus for 21 days. FDR<0.05.
Gene_ID	Gene	Description	3 Mixture	PASA	log2(fold_change)	p_value	q_value
PA0191	PA0191	Probable transcriptional regulator	39.2412	3.92632	-3.32112	0.00015	0.0198175
PA0280	cysA	Sulfate transport protein CysA	630.327	50.6705	-3.63688	5e-05	0.00830732
PA0281	cysW	Sulfate transport protein CysW	412.297	36.5536	-3.4956	5e-05	0.00830732
PA0282	cysT	Sulfate transport protein CysT	452.162	52.2867	-3.11232	5e-05	0.00830732
PA0283	sbp	Sulfate-binding protein precursor	1182.11	155.131	-2.9298	5e-05	0.00830732
PA0989	PA0989	Hypothetical protein	223.636	27.9679	-2.99931	0.0001	0.0148185
PA1078	flgC	Flagellar basal-body rod protein FlgC	399.127	83.1039	-2.26386	0.00045	0.0427851
PA1395	PA1395	Hypothetical protein	240.203	51.7356	-2.21502	0.0004	0.03928
PA1399	PA1399	Probable transcriptional regulator	58.6037	11.9313	-2.29624	0.0005	0.0465963
PA1648	PA1648	probable oxidoreductase	157.341	31.2147	-2.3336	0.00015	0.0198175
PA1649	PA1649	probable short-chain dehydrogenase	299.861	54.6943	-2.45483	0.00025	0.0287561
PA1828	PA1828	probable short-chain dehydrogenase	740.636	137.799	-2.4262	5e-05	0.00830732
PA1838	cysI	Sulfite reductase	1252.28	190.039	-2.72019	5e-05	0.00830732
PA1844	tse1	Endopeptidase, HSI-I Type VI secretion system	116.514	13.8907	-3.06831	0.0005	0.0465963
PA1927	metE	5-methyltetrahydropteroyltriglutamate-homocysteine S-methyltransferase	318.724	64.1425	-2.31295	0.00035	0.0363216
PA1967	PA1967	Hypothetical protein	222.182	42.7894	-2.37642	0.0004	0.03928
PA1983	exaB	Cytochrome c550	275.102	26.6429	-3.36815	5e-05	0.00830732
PA2062	PA2062	Probable pyridoxal-phosphate dependent enzyme	331.828	43.3735	-2.93555	5e-05	0.00830732
PA2095	PA2095	Hypothetical protein	88.7133	16.2403	-2.44957	0.00015	0.0198175
PA2203	PA2203	Probable amino acid permease	65.3511	6.83972	-3.2562	0.0001	0.0148185
PA2204	PA2204	Probable binding protein component of ABC transporter	958.774	147.87	-2.69686	5e-05	0.00830732
PA2205	PA2205	Hypothetical protein	235.303	40.6274	-2.534	0.00035	0.0363216
PA2312	PA2312	Probable transcriptional regulator	146.473	13.9177	-3.39564	5e-05	0.00830732
PA2331	PA2331	Hypothetical protein	787.881	63.1533	-3.64105	5e-05	0.00830732
PA2550	PA2550	Probable acyl-CoA dehydrogenase	828.017	144.582	-2.51777	0.0001	0.0148185
PA2664	fhp	flavohemoprotein	809.821	131.153	-2.62635	5e-05	0.00830732
PA2786	PA2786	Hypothetical protein	472.58	55.4168	-3.09216	5e-05	0.00830732
PA3444	PA3444	Conserved hypothetical protein	37.4252	7.03802	-2.41077	0.00015	0.0198175
PA3445	PA3445	Conserved hypothetical protein	51.3764	9.93164	-2.371	0.00025	0.0287561
PA3450	lsfA	1-Cys peroxiredoxin LsfA	1105.75	211.128	-2.38883	0.0004	0.03928
PA3661	PA3661	Hypothetical protein	689.162	53.6695	-3.68267	5e-05	0.00830732
PA3729	PA3729	Conserved hypothetical protein	295.979	60.6973	-2.28579	0.00025	0.0287561
PA3932	PA3932	Probable transcriptional regulator	59.4331	11.0312	-2.42968	0.00025	0.0287561
PA3938	PA3938	Probable periplasmic taurine-binding protein precursor	116.639	17.8562	-2.70756	0.0001	0.0148185
PA4034	aqpZ	Aquaporin Z	601.086	126.091	-2.25311	0.00055	0.0491667
PA4191	PA4191	Probable iron/ascorbate oxidoreductase	109.118	21.7225	-2.32862	0.0003	0.0326791
PA4442	cysN	ATP sulfurylase GTP-binding subunit/APS kinase	1341.88	169.056	-2.98869	5e-05	0.00830732
PA4443	cysD	ATP sulfurylase small subunit	1731.09	304.6	-2.5067	0.00025	0.0287561
PA4589	PA4589	Probable outer membrane protein precursor	48.0379	10.0951	-2.25052	0.0005	0.0465963
PA4590	pra	Protein activator	284.603	36.7294	-2.95394	0.0001	0.0148185
PA5024	PA5024	Conserved hypothetical protein	343.396	57.9889	-2.56602	5e-05	0.00830732
PA5025	metY	Homocysteine synthase	117.758	22.9839	-2.35712	0.0004	0.03928
PA5234	PA5234	Probable oxidoreductase	232.066	44.6981	-2.37625	0.0003	0.0326791
PA5383	PA5383	Conserved hypothetical protein	514.194	67.3293	-2.93301	5e-05	0.00830732
PA0447	gcdH	Glutaryl-CoA dehydrogenase	48.7215	242.685	2.31646	0.0005	0.0465963
PA0459	PA0459	Probable ClpA/B protease ATP binding subunit	6.9616	43.445	2.6417	0.0001	0.0148185
PA0865	hpd	4-Hydroxyphenylpyruvate dioxygenase	18.9142	96.7415	2.35467	0.00015	0.0198175
PA0887	acsA	Acetyl-coenzyme A synthetase	45.1214	372.202	3.0442	5e-05	0.00830732
PA1137	PA1137	Probable oxidoreductase	38.73	213.245	2.46099	0.0003	0.0326791
PA1183	dctA	C4-dicarboxylate transport protein	14.7408	73.6485	2.32084	0.00025	0.0287561
PA2402	PA2402	Probable non-ribosomal peptide synthetase	23.0975	117.016	2.3409	0.00025	0.0287561
PA2424	pvdL	pvdL	16.2497	91.6424	2.49561	0.00035	0.0363216
PA2486	PA2486	Hypothetical protein	2486.31	14650.3	2.55885	5e-05	0.00830732
PA2932	morB	Morphinone reductase	414.26	1880	2.18212	0.0004	0.03928
PA3038	opdQ	opdQ	22.7252	174.569	2.94144	5e-05	0.00830732
PA3233	PA3233	Hypothetical protein	9.38592	130.944	3.80231	5e-05	0.00830732
PA3234	PA3234	Probable sodium:solute symporter	23.0309	332.844	3.8532	5e-05	0.00830732
PA3361	lecB	Fucose-binding lectin PA-IIL	187.304	1748.86	3.22296	5e-05	0.00830732
PA3413	PA3413	Conserved hypothetical protein	308.777	1574.5	2.35026	0.00055	0.0491667
PA3415	PA3415	Probable dihydrolipoamide acetyltransferase	14.2588	69.3614	2.28228	0.00045	0.0427851
PA3601	PA3601	Conserved hypothetical protein	591.789	3863.61	2.7068	5e-05	0.00830732
PA4155	PA4155	Hypothetical protein	14.6465	108.258	2.88584	5e-05	0.00830732
PA4156	fvbA	FvbA	18.4708	249.269	3.75438	5e-05	0.00830732
PA4158	fepC	Ferric enterobactin transport protein FepC	13.4616	66.7056	2.30896	0.00045	0.0427851
PA4221	fptA	Fe(III)-pyochelin outer membrane receptor precursor	291.634	1377.41	2.23973	0.00035	0.0363216
PA4570	PA4570	Hypothetical protein	3798.92	23164.9	2.60828	5e-05	0.00830732
PA4837	PA4837	Probable outer membrane protein precursor	9.2223	64.3598	2.80296	5e-05	0.00830732
PA5396	PA5396	Hypothetical protein	24.1082	119.511	2.30954	0.00025	0.0287561
PA5397	PA5397	Hypothetical protein	35.559	175.81	2.30573	0.0002	0.0250167
PA5398	dgcA	DgcA, Dimethylglycine catabolism	24.7659	171.062	2.78809	5e-05	0.00830732
PA5410	gbcA	Glycine-betaine dioxygenase subunit, GbcA	29.6557	174.863	2.55984	0.00025	0.0287561
PA5416	soxB	Sarcosine oxidase beta subunit	24.637	141.383	2.52072	0.00015	0.0198175
PA5418	soxA	Sarcosine oxidase alpha subunit	30.2417	187.076	2.62901	5e-05	0.00830732
PA5419	soxG	Sarcosine oxidase gamma subunit	38.943	219.674	2.49593	5e-05	0.00830732
PA5420	purU2	Formyltetrahydrofolate deformylase	30.1691	218.033	2.8534	5e-05	0.00830732
PA5421	fdhA	Glutathione-independent formaldehyde dehydrogenase	38.309	245.422	2.67951	5e-05	0.00830732
