# Supplementary material for: Pseudomonas aeruginosa Quorum-Sensing and Type VI Secretion System Can Direct Interspecific Coexistence During Evolution
Source: Front Microbiol. 2018 Oct 11;9:2287. doi: 10.3389/fmicb.2018.02287 (PMC6193480; doi:10.3389/fmicb.2018.02287)
Supplement: Supplementary file 4 [file Table_4.XLSX]

## Sheet: Sheet1
Supplementary Dataset 4. Differentially expressed genes of P. aeruginosa between different culture conditions. 3 Mixture, co-culture of P. aeruginosa,
K. pneumoniae and S. aureus for 21 days. PAKP, co-culture of P. aeruginosa and K. pneumoniae for 21 days. FDR<0.05.
Gene_ID	Gene	Description	3 Mixture	PAKP	log2(fold_change)	p_value	q_value
PA0280	cysA	Sulfate transport protein CysA	630.327	117.686	-2.42116	5e-05	0.00830732
PA0281	cysW	Sulfate transport protein CysW	412.297	72.6054	-2.50554	0.0001	0.0148185
PA0525	PA0525	Probable dinitrification protein NorD	20.1282	3.93926	-2.35322	0.00045	0.0427851
PA0996	pqsA	pqsA	339.131	39.3877	-3.10603	0.0002	0.0250167
PA1896	PA1896	Hypothetical protein	115.197	19.8984	-2.53338	5e-05	0.00830732
PA1897	PA1897	Hypothetical protein	242.047	49.948	-2.27679	0.00035	0.0363216
PA3337	rfaD	ADP-L-glycero-D-mannoheptose 6-epimerase	98.35	19.7414	-2.3167	0.00035	0.0363216
PA4022	hdhA	Hydrazone dehydrogenase, HdhA	24.0947	191.58	2.99116	5e-05	0.00830732
PA4023	PA4023	Probable transport protein	4.43408	37.6321	3.08525	5e-05	0.00830732
