# Supplementary material for: Pseudomonas aeruginosa Quorum-Sensing and Type VI Secretion System Can Direct Interspecific Coexistence During Evolution
Source: Front Microbiol. 2018 Oct 11;9:2287. doi: 10.3389/fmicb.2018.02287 (PMC6193480; doi:10.3389/fmicb.2018.02287)
Supplement: Supplementary file 6 [file Table_6.XLSX]

## Sheet: Total exp.
Supplementary Dataset 6. Differentially expressed genes of P. aeruginosa between mono-culture and co-culture with K. pneumoniae after 21 days. FDR<0.05.
Gene_ID	Gene	Description	PAKP	PA	log2(fold change)	p_value	q_value
PA0080	tssJ1	Type VI secretion system	161.284	25.7864	-2.64492	0.00025	0.0287561
PA0083	tssB1	Type VI secretion system	1161.05	199.797	-2.53882	5e-05	0.00830732
PA0084	tssC1	Type VI secretion system	808.275	166.58	-2.27863	0.0003	0.0326791
PA0085	hcp1	Type VI secretion system effector	1494.27	332.53	-2.16788	0.0004	0.03928
PA0277	PA0277	Conserved hypothetical protein	60.042	7.54231	-2.99289	0.0001	0.0148185
PA0282	cysT	Sulfate transport protein CysT	103.363	22.2399	-2.2165	0.00045	0.0427851
PA0283	sbp	Sulfate-binding protein precursor	348.583	55.2407	-2.6577	5e-05	0.00830732
PA0532	PA0532	Hypothetical protein	223.92	39.2794	-2.51114	5e-05	0.00830732
PA0563	PA0563	Conserved hypothetical protein	3861.82	739.866	-2.38394	0.00025	0.0287561
PA1077	flgB	Flagellar basal-body rod protein FlgB	1036.37	152.807	-2.76175	5e-05	0.00830732
PA1078	flgC	Flagellar basal-body rod protein FlgC	497.743	69.2013	-2.84653	5e-05	0.00830732
PA1079	flgD	Flagellar basal-body rod modification protein FlgD	486.193	89.1736	-2.44684	0.0003	0.0326791
PA1080	flgE	Flagellar hook protein FlgE	637.784	100.488	-2.66605	5e-05	0.00830732
PA1081	flgF	Flagellar basal-body rod protein FlgF	621.056	102.374	-2.60087	5e-05	0.00830732
PA1082	flgG	Flagellar basal-body rod protein FlgG	1524.28	210.361	-2.85719	5e-05	0.00830732
PA1083	flgH	Flagellar L-ring protein precursor FlgH	1021.99	137.087	-2.89822	5e-05	0.00830732
PA1084	flgI	Flagellar P-ring protein precursor FlgI	618.037	113.58	-2.44398	0.0001	0.0148185
PA1326	ilvA2	Threonine dehydratase, biosynthetic	280.146	30.8897	-3.18098	5e-05	0.00830732
PA1399	PA1399	Probable transcriptional regulator	48.4227	5.72126	-3.08128	5e-05	0.00830732
PA1441	PA1441	Putative flagellar hook-length control protein FliK	522.798	113.167	-2.2078	0.0003	0.0326791
PA1452	flhA	Flagellar biosynthesis protein FlhA	626.055	132.24	-2.24313	0.00055	0.0491667
PA1453	flhF	Flagellar biosynthesis protein FlhF	1571.34	338.09	-2.21652	0.0004	0.03928
PA1648	PA1648	probable oxidoreductase	179.146	20.3388	-3.13883	5e-05	0.00830732
PA1649	PA1649	probable short-chain dehydrogenase	225.294	25.2714	-3.15623	5e-05	0.00830732
PA1828	PA1828	probable short-chain dehydrogenase	549.428	89.7585	-2.61381	0.0001	0.0148185
PA1829	PA1829	Hypothetical protein	345.01	55.5914	-2.6337	0.0001	0.0148185
PA1844	tse1	Endopeptidase, H1 Type VI secretion system	76.0527	9.25664	-3.03844	0.0004	0.03928
PA1967	PA1967	Hypothetical protein	238.953	33.9868	-2.81368	0.00015	0.0198175
PA2027	PA2027	Hypothetical protein	1381.51	93.293	-3.88834	5e-05	0.00830732
PA2062	PA2062	Probable pyridoxal-phosphate dependent enzyme	112.709	14.3402	-2.97446	5e-05	0.00830732
PA2204	PA2204	Probable binding protein component of ABC transporter	399.301	59.478	-2.74705	0.0001	0.0148185
PA2550	PA2550	Probable acyl-CoA dehydrogenase	917.863	63.5464	-3.8524	5e-05	0.00830732
PA2786	PA2786	Hypothetical protein	246.864	20.8673	-3.5644	5e-05	0.00830732
PA2943	PA2943	Phospho-2-dehydro-3-deoxyheptonate aldolase	378.961	60.743	-2.64126	5e-05	0.00830732
PA3118	leuB	3-isopropylmalate dehydrogenase	1727.52	323.623	-2.41632	0.00015	0.0198175
PA3119	PA3119	Conserved hypothetical protein	1080.39	232.304	-2.21747	0.00045	0.0427851
PA3120	leuD	3-isopropylmalate dehydratase small subunit	3619.67	608.601	-2.57229	5e-05	0.00830732
PA3121	leuC	3-isopropylmalate dehydratase large subunit	5782.19	1009.06	-2.51861	5e-05	0.00830732
PA3181	PA3181	2-keto-3-deoxy-6-phosphogluconate aldolaseAdd	517.388	72.6437	-2.83234	5e-05	0.00830732
PA3183	zwf	Glucose-6-phosphate 1-dehydrogenase	1057.78	133.906	-2.98174	5e-05	0.00830732
PA3194	edd	Phosphogluconate dehydratase	587.384	76.3639	-2.94334	5e-05	0.00830732
PA3195	gapA	Glyceraldehyde 3-phosphate dehydrogenase	480.684	64.0295	-2.90828	5e-05	0.00830732
PA3216	PA3216	Hypothetical protein	929.544	155.947	-2.57547	0.00025	0.0287561
PA3277	PA3277	Probable short-chain dehydrogenase	200.664	35.8621	-2.48425	0.0002	0.0250167
PA3427	PA3427	Probable short-chain dehydrogenases	427.722	48.9697	-3.12671	5e-05	0.00830732
PA3450	lsfA	1-Cys peroxiredoxin LsfA	515.164	58.4842	-3.13891	5e-05	0.00830732
PA3454	PA3454	Probable acyl-CoA thiolase	161.431	33.4545	-2.27064	0.0004	0.03928
PA3661	PA3661	Hypothetical protein	370.034	62.981	-2.55467	0.00025	0.0287561
PA3792	leuA	2-isopropylmalate synthaseAdd	5606.64	491.723	-3.51122	5e-05	0.00830732
PA4022	hdhA	Hydrazone dehydrogenase, HdhA	191.58	32.4408	-2.56207	0.00015	0.0198175
PA4034	aqpZ	Aquaporin Z	987.895	101.471	-3.2833	5e-05	0.00830732
PA4139	PA4139	Hypothetical protein	34.7231	0	-	5e-05	0.00830732
PA4443	cysD	ATP sulfurylase small subunit	822.005	134.734	-2.60903	5e-05	0.00830732
PA4590	pra	Protein activator	221.438	32.7176	-2.75876	5e-05	0.00830732
PA4694	ilvC	Ketol-acid reductoisomerase	5009.17	891.47	-2.49031	5e-05	0.00830732
PA4695	ilvH	Acetolactate synthase isozyme III small subunit	3391.38	619.81	-2.45197	0.0003	0.0326791
PA4696	ilvI	Acetolactate synthase large subunit	5329.02	736.249	-2.85561	5e-05	0.00830732
PA5020	PA5020	Probable acyl-CoA dehydrogenase	289.887	54.5647	-2.40945	0.00025	0.0287561
PA5024	PA5024	Conserved hypothetical protein	181.277	19.1816	-3.2404	5e-05	0.00830732
PA5234	PA5234	Probable oxidoreductase	174.394	29.296	-2.57357	0.0001	0.0148185
PA5429	aspA	Aspartate ammonia-lyase	429.432	44.7717	-3.26177	5e-05	0.00830732
PA0141	PA0141	Conserved hypothetical protein	27.3475	162.182	2.56814	0.0001	0.0148185
PA0446	PA0446	Conserved hypothetical protein	27.7575	150.648	2.44023	0.0001	0.0148185
PA0447	gcdH	Glutaryl-CoA dehydrogenase	93.2158	570.252	2.61295	5e-05	0.00830732
PA0516	nirF	Heme d1 biosynthesis protein NirF	3.382	24.7938	2.87403	0.00035	0.0363216
PA0525	PA0525	Probable dinitrification protein NorD	3.93926	22.2798	2.49974	0.0004	0.03928
PA0865	hpd	4-hydroxyphenylpyruvate dioxygenase	20.4153	263.314	3.68906	5e-05	0.00830732
PA0866	aroP2	Aromatic amino acid transport protein AroP2	18.7776	84.4083	2.16837	0.0004	0.03928
PA0872	phhA	Phenylalanine-4-hydroxylase	43.8879	231.085	2.39653	0.00035	0.0363216
PA0996	pqsA	AMP-dependent synthetase/ligase	39.3877	480.839	3.60974	5e-05	0.00830732
PA0999	pqsD	3-oxoacyl-[acyl-carrier-protein] synthase III	43.1779	390.259	3.17607	0.0002	0.0250167
PA1183	dctA	C4-dicarboxylate transport protein	20.8332	154.51	2.89074	5e-05	0.00830732
PA1414	PA1414	Hypothetical protein	1563.76	11531.5	2.88249	5e-05	0.00830732
PA1499	PA1499	Conserved hypothetical protein	2.55255	18.0525	2.82219	0.0004	0.03928
PA1546	hemN	Oxygen-independent coproporphyrinogen III oxidase	59.5809	331.295	2.47519	0.0002	0.0250167
PA1556	ccoO2	Cytochrome c oxidase, cbb3-type, CcoO subunit	69.1362	364.784	2.39953	0.00015	0.0198175
PA1673	PA1673	Bacteriohemerythrin-like protein	101.124	487.476	2.26921	0.00025	0.0287561
PA1746	PA1746	Hypothetical protein	57.2059	326.96	2.51488	5e-05	0.00830732
PA2194	hcnB	Hydrogen cyanide synthase HcnB	10.8376	71.4008	2.71989	0.0002	0.0250167
PA2195	hcnC	Hydrogen cyanide synthase HcnC	9.1096	97.431	3.41892	5e-05	0.00830732
PA2249	bkdB	Branched-chain alpha-keto acid dehydrogenase	28.9523	161.513	2.4799	0.00045	0.0427851
PA2753	PA2753	Hypothetical protein	33.6097	324.244	3.27013	5e-05	0.00830732
PA2932	morB	Morphinone reductase	207.443	1321.96	2.6719	5e-05	0.00830732
PA2933	PA2933	Probable MFS transporter	56.6117	510.722	3.17336	5e-05	0.00830732
PA2934	cif	CFTR inhibitory factor, Cif	75.4453	546.305	2.8562	5e-05	0.00830732
PA2936	PA2936	Di-haem cytochrome	12.9729	98.0772	2.91841	0.00015	0.0198175
PA3132	PA3132	Probable hydrolase	198.92	945.482	2.24886	0.00055	0.0491667
PA3305.1	phrS	Small RNA	6854.64	49969.4	2.86589	5e-05	0.00830732
PA3309	PA3309	Conserved hypothetical protein	294.762	1943.81	2.72127	5e-05	0.00830732
PA3333	fabH2	3-oxoacyl-[acyl-carrier-protein] synthase III	7.92423	62.7673	2.98567	5e-05	0.00830732
PA3337	rfaD	ADP-L-glycero-D-mannoheptose 6-epimerase	19.7414	185.275	3.23037	5e-05	0.00830732
PA3361	lecB	Fucose-binding lectin PA-IILAdd	76.3574	1577.49	4.36872	5e-05	0.00830732
PA4133	PA4133	Cytochrome c oxidase subunit (cbb3-type)	253.225	1429.17	2.49668	0.0002	0.0250167
PA4571	PA4571	Probable cytochrome c	16.2921	83.0044	2.34901	0.00045	0.0427851
PA5098	hutH	Histidine ammonia-lyase	3.93861	20.7716	2.39886	0.0004	0.03928
PA5100	hutU	Urocanase	12.7589	63.7323	2.32053	0.00035	0.0363216
PA5170	arcD	Arginine/ornithine antiporter	88.6798	608.091	2.77761	5e-05	0.00830732
PA5171	arcA	Arginine deiminase	82.689	642.145	2.95713	5e-05	0.00830732
PA5172	arcB	Ornithine carbamoyltransferase, catabolic	65.115	492.129	2.91797	5e-05	0.00830732
PA5173	arcC	Carbamate kinase	35.9217	268.963	2.90448	5e-05	0.00830732
PA5302	dadX	Catabolic alanine racemase	5.3113	55.5616	3.38695	5e-05	0.00830732
PA5379	sdaB	L-serine dehydratase	16.0945	79.3537	2.30173	0.0002	0.0250167
PA5397	PA5397	Hypothetical protein	22.854	128.524	2.49152	0.0004	0.03928
PA5398	dgcA	DgcA, Dimethylglycine catabolism	16.2191	109.833	2.75955	0.0001	0.0148185
PA5399	dgcB	DgcB, Dimethylglycine catabolism	6.59455	50.3274	2.932	5e-05	0.00830732
PA5400	PA5400	Probable electron transfer flavoprotein alpha subunit	4.64506	51.703	3.47648	5e-05	0.00830732
PA5401	PA5401	Hypothetical protein	3.93882	57.797	3.87516	0.0001	0.0148185
PA5415	glyA1	Serine hydroxymethyltransferase	16.4517	103.804	2.65755	0.0001	0.0148185
PA5416	soxB	Sarcosine oxidase beta subunit	11.8646	99.1434	3.06285	5e-05	0.00830732
PA5418	soxA	Sarcosine oxidase alpha subunit	13.2426	125.279	3.24188	5e-05	0.00830732
PA5419	soxG	Sarcosine oxidase gamma subunit	16.4958	152.504	3.20868	5e-05	0.00830732
PA5420	purU2	Formyltetrahydrofolate deformylase	14.9021	119.267	3.00061	5e-05	0.00830732
PA5421	fdhA	Glutathione-independent formaldehyde dehydrogenase	18.9768	130.657	2.78348	5e-05	0.00830732
PA5427	adhA	Alcohol dehydrogenase	86.7825	644.112	2.89184	5e-05	0.00830732
PA5475	PA5475	Hypothetical protein	127.102	868.683	2.77285	5e-05	0.00830732

## Sheet: Up-regulated KEGG
Group ID	Pathways	Count	%	P-Value	Benjamini
1	Flagellar assembly	10	18.2	3e-09	1.1e-07
2	Valine, leucine and isoleucine biosynthesis	8	14.5	2e-08	3.6e-07
3	2-Oxocarboxylic acid metabolism	7	12.7	1.3e-05	0.00016
4	C5-Branched dibasic acid metabolism	5	9.1	7.6e-05	0.00069
5	Biosynthesis of amino acids	10	18.2	0.00079	0.0057
6	Biosynthesis of secondary metabolites	14	25.5	0.0038	0.023
7	Biosynthesis of antibiotics	10	18.2	0.021	0.1
8	Carbon metabolism	7	12.7	0.025	0.11
9	Pantothenate and CoA biosynthesis	3	5.5	0.053	0.2
10	Pentose phosphate pathway	3	5.5	0.073	0.24

## Sheet: Down-regulated KEGG
Group ID	Pathways	Count	%	P-Value	Benjamini
1	Metabolic pathways	23	42.6	0.00014	0.0054
2	Glycine, serine and threonine metabolism	6	11.1	0.00077	0.014
3	Cyanoamino acid metabolism	3	5.6	0.012	0.14
4	Biosynthesis of secondary metabolites	10	18.5	0.07	0.5
5	Arginine biosynthesis	3	5.6	0.079	0.46
