# Supplementary material for: Pseudomonas aeruginosa Quorum-Sensing and Type VI Secretion System Can Direct Interspecific Coexistence During Evolution
Source: Front Microbiol. 2018 Oct 11;9:2287. doi: 10.3389/fmicb.2018.02287 (PMC6193480; doi:10.3389/fmicb.2018.02287)
Supplement: Supplementary file 9 [file Table_9.XLSX]

## Sheet: Sheet1
Supplementary Dataset 9. Differentially expressed genes of P. aeruginosa between mono-culture and co-culture with K. pneumoniae after 1 day.
Gene_ID	Gene	Locus	PAKP	PA	log2(fold_change)	p_value	q_value	Significant
XLOC_000001	dnaA	gi|110227054|gb|AE004091.2|:482-2027	274.024	221.7	-0.305692	0.6013	0.995483	no
XLOC_000009	PA0020	gi|110227054|gb|AE004091.2|:21711-22737	464.892	445.885	-0.0602246	0.9207	0.995483	no
XLOC_000075	PA0159	gi|110227054|gb|AE004091.2|:182767-186766	50.7771	45.6603	-0.153237	0.88465	0.995483	no
XLOC_000740	PA1733	gi|110227054|gb|AE004091.2|:1875848-1876580	38.1309	60.7882	0.672833	0.29275	0.995483	no
XLOC_000741	PA1735	gi|110227054|gb|AE004091.2|:1877521-1878409	29.4444	16.1797	-0.86381	0.22305	0.995483	no
XLOC_000742	PA1736	gi|110227054|gb|AE004091.2|:1878979-1880185	17.1502	22.1626	0.369904	0.5781	0.995483	no
XLOC_000743	PA1737	gi|110227054|gb|AE004091.2|:1880198-1882343	24.1272	21.9173	-0.138591	0.82045	0.995483	no
XLOC_000744	PA1739	gi|110227054|gb|AE004091.2|:1883660-1884632	7.71389	10.0548	0.382349	0.6574	0.995483	no
XLOC_000745	PA1740	gi|110227054|gb|AE004091.2|:1884654-1885653	10.433	18.1653	0.800028	0.2942	0.995483	no
XLOC_000746	PA1742	gi|110227054|gb|AE004091.2|:1886277-1887000	836.29	966.062	0.208113	0.7233	0.995483	no
XLOC_000747	PA1746	gi|110227054|gb|AE004091.2|:1888406-1888913	5175.07	7675.09	0.568606	0.39975	0.995483	no
XLOC_000748	PA1749	gi|110227054|gb|AE004091.2|:1890195-1890681	1075.8	646.878	-0.73385	0.22425	0.995483	no
XLOC_000749	PA1752	gi|110227054|gb|AE004091.2|:1892132-1893457	72.4584	77.1434	0.0903905	0.8852	0.995483	no
XLOC_000076	PA0160	gi|110227054|gb|AE004091.2|:182767-186766	128.659	116.838	-0.139038	0.8092	0.995483	no
XLOC_000749	PA1751	gi|110227054|gb|AE004091.2|:1892132-1893457	44.1055	61.7242	0.484876	0.77625	0.995483	no
XLOC_000750	PA1753	gi|110227054|gb|AE004091.2|:1893619-1894117	195.137	397.192	1.02535	0.0781	0.995483	no
XLOC_000751	cysB	gi|110227054|gb|AE004091.2|:1894248-1895223	208.234	180.288	-0.2079	0.7117	0.995483	no
XLOC_000752	thrH	gi|110227054|gb|AE004091.2|:1896629-1897247	168.707	123.909	-0.445245	0.44915	0.995483	no
XLOC_000753	PA1759	gi|110227054|gb|AE004091.2|:1898815-1901521	85.3021	92.243	0.112859	0.83895	0.995483	no
XLOC_000754	PA1760	gi|110227054|gb|AE004091.2|:1901523-1904247	53.8741	54.7102	0.0222179	0.96735	0.995483	no
XLOC_000755	PA1761	gi|110227054|gb|AE004091.2|:1904478-1904916	126.29	94.1427	-0.423822	0.5063	0.995483	no
XLOC_000756	PA1762	gi|110227054|gb|AE004091.2|:1904994-1905756	22.287	31.1792	0.48438	0.49135	0.995483	no
XLOC_000757	PA1763	gi|110227054|gb|AE004091.2|:1905796-1906822	16.5775	23.7042	0.515914	0.45275	0.995483	no
XLOC_000758	PA1764	gi|110227054|gb|AE004091.2|:1906841-1908440	11.8965	12.8091	0.106628	0.8746	0.995483	no
XLOC_000077	opdC	gi|110227054|gb|AE004091.2|:182767-186766	28.295	22.3305	-0.341532	0.81	0.995483	no
XLOC_000759	PA1765	gi|110227054|gb|AE004091.2|:1908453-1909641	14.4527	23.2489	0.685824	0.31785	0.995483	no
XLOC_000760	ppsA	gi|110227054|gb|AE004091.2|:1914036-1916412	251.103	210.246	-0.256198	0.66345	0.995483	no
XLOC_000761	estX	gi|110227054|gb|AE004091.2|:1916481-1917492	16.1512	6.65957	-1.27814	0.1187	0.995483	no
XLOC_000762	PA1772	gi|110227054|gb|AE004091.2|:1917598-1918087	556.119	293.442	-0.92232	0.1188	0.995483	no
XLOC_000763	cmaX	gi|110227054|gb|AE004091.2|:1918274-1919273	47.6939	28.7266	-0.731419	0.2605	0.995483	no
XLOC_000764	crfX	gi|110227054|gb|AE004091.2|:1919321-1919576	549.073	465.134	-0.23935	0.70495	0.995483	no
XLOC_000765	cmpX	gi|110227054|gb|AE004091.2|:1919578-1920403	198.381	164.537	-0.269865	0.63195	0.995483	no
XLOC_000766	sigX	gi|110227054|gb|AE004091.2|:1920567-1921065	627.656	502.959	-0.319533	0.59075	0.995483	no
XLOC_000767	oprF	gi|110227054|gb|AE004091.2|:1921173-1922226	14491.1	9194.16	-0.656379	0.3837	0.995483	no
XLOC_000768	PA1788	gi|110227054|gb|AE004091.2|:1935012-1940206	165.742	166.213	0.00409622	0.91415	0.995483	no
XLOC_000078	PA0166	gi|110227054|gb|AE004091.2|:186801-196814	0	0	0	1	1	no
XLOC_000769	PA1790	gi|110227054|gb|AE004091.2|:1935012-1940206	54.9696	32.53	-0.756861	0.7822	0.995483	no
XLOC_000770	glnS	gi|110227054|gb|AE004091.2|:1941719-1944737	109.897	70.1124	-0.648413	0.6904	0.995483	no
XLOC_000771	cysS	gi|110227054|gb|AE004091.2|:1944746-1946129	136.222	112.562	-0.275237	0.62875	0.995483	no
XLOC_000776	PA1797a	gi|110227054|gb|AE004091.2|:1947993-1948215	20.5404	81.9003	1.99541	0.3126	0.995483	no
XLOC_000777	ppiD	gi|110227054|gb|AE004091.2|:1950438-1972956	0	0	0	1	1	no
XLOC_000777	hupB	gi|110227054|gb|AE004091.2|:1950438-1972956	13493.2	9868.71	-0.451303	0.7493	0.995483	no
XLOC_000777	lon	gi|110227054|gb|AE004091.2|:1950438-1972956	110.021	173.287	0.655379	0.81515	0.995483	no
XLOC_000777	clpX	gi|110227054|gb|AE004091.2|:1950438-1972956	1464.36	1632.49	0.156804	0.6795	0.995483	no
XLOC_000777	clpP	gi|110227054|gb|AE004091.2|:1950438-1972956	0	0	0	1	1	no
XLOC_000777	tig	gi|110227054|gb|AE004091.2|:1950438-1972956	240.981	0	#NAME?	0.05865	0.995483	no
XLOC_000078	PA0167	gi|110227054|gb|AE004091.2|:186801-196814	123.031	79.3664	-0.632417	0.71445	0.995483	no
XLOC_000778	PA1814	gi|110227054|gb|AE004091.2|:1950438-1972956	47.7579	56.9619	0.25426	0.9144	0.995483	no
XLOC_000779	rnhA	gi|110227054|gb|AE004091.2|:1972958-1973405	60.814	59.6009	-0.0290693	0.9711	0.995483	no
XLOC_000780	dnaQ	gi|110227054|gb|AE004091.2|:1973469-1974210	109.17	78.465	-0.476455	0.43485	0.995483	no
XLOC_000781	ldcA	gi|110227054|gb|AE004091.2|:1974657-1984288	118.935	55.9589	-1.08773	0.34565	0.995483	no
XLOC_000781	PA1819	gi|110227054|gb|AE004091.2|:1974657-1984288	0	0	0	1	1	no
XLOC_000782	fimL	gi|110227054|gb|AE004091.2|:1974657-1984288	2.28008	0.0164484	-7.11499	1	1	no
XLOC_000782	fimL	gi|110227054|gb|AE004091.2|:1974657-1984288	0	0	0	1	1	no
XLOC_000782	PA1821	gi|110227054|gb|AE004091.2|:1974657-1984288	188.275	196.463	0.0614197	0.94125	0.995483	no
XLOC_000783	PA1825	gi|110227054|gb|AE004091.2|:1984388-1985935	44.2974	45.3678	0.0344451	0.97535	0.995483	no
XLOC_000784	PA1827	gi|110227054|gb|AE004091.2|:1986066-1986828	4.24514	9.59359	1.17626	0.28025	0.995483	no
XLOC_000078	PA0168	gi|110227054|gb|AE004091.2|:186801-196814	26.5401	40.665	0.615612	0.75425	0.995483	no
XLOC_000785	PA1833	gi|110227054|gb|AE004091.2|:1986863-1993366	60.9505	76.7185	0.331935	0.8673	0.995483	no
XLOC_000785	PA1832	gi|110227054|gb|AE004091.2|:1986863-1993366	213.201	257.347	0.271498	0.84425	0.995483	no
XLOC_000786	PA1836	gi|110227054|gb|AE004091.2|:1994020-1994602	31.3121	27.2739	-0.199197	0.78955	0.995483	no
XLOC_000787	PA1841	gi|110227054|gb|AE004091.2|:1998586-1999460	0	0.368152	inf	1	1	no
XLOC_000787	PA1840	gi|110227054|gb|AE004091.2|:1998586-1999460	378.18	188.231	-1.00656	0.1555	0.995483	no
XLOC_000788	cti	gi|110227054|gb|AE004091.2|:2005253-2007542	51.4623	40.1696	-0.357413	0.51795	0.995483	no
XLOC_000789	PA1847	gi|110227054|gb|AE004091.2|:2007664-2008249	1105.95	1055.46	-0.067412	0.9056	0.995483	no
XLOC_000790	PA1851	gi|110227054|gb|AE004091.2|:2010999-2014823	27.7952	34.5871	0.315402	0.7661	0.995483	no
XLOC_000791	PA1853	gi|110227054|gb|AE004091.2|:2010999-2014823	83.4642	57.9041	-0.527494	0.53455	0.995483	no
XLOC_000792	PA1860	gi|110227054|gb|AE004091.2|:2019775-2020603	25.6278	42.9521	0.74502	0.2559	0.995483	no
XLOC_000078	PA0165	gi|110227054|gb|AE004091.2|:186801-196814	0	0	0	1	1	no
XLOC_000793	PA1866	gi|110227054|gb|AE004091.2|:2024064-2028013	42.0372	64.186	0.610591	0.3367	0.995483	no
XLOC_000793	PA1865	gi|110227054|gb|AE004091.2|:2024064-2028013	20.4801	26.9608	0.39664	0.7267	0.995483	no
XLOC_000794	PA1866a	gi|110227054|gb|AE004091.2|:2028102-2028312	56.4861	68.7951	0.28441	0.83105	0.995483	no
XLOC_000795	xqhA	gi|110227054|gb|AE004091.2|:2028453-2031298	6.68904	8.09812	0.275786	0.69725	0.995483	no
XLOC_000795	xphA	gi|110227054|gb|AE004091.2|:2028453-2031298	3.6518	12.2791	1.74953	0.37375	0.995483	no
XLOC_000796	PA1869	gi|110227054|gb|AE004091.2|:2031465-2031705	41.8871	264.313	2.65767	0.0561	0.995483	no
XLOC_000797	PA1870	gi|110227054|gb|AE004091.2|:2031987-2032413	10.6474	93.1575	3.12917	0.0288	0.995483	no
XLOC_000798	lasA	gi|110227054|gb|AE004091.2|:2032694-2033951	36.017	69.0431	0.93882	0.1219	0.995483	no
XLOC_000799	PA1874	gi|110227054|gb|AE004091.2|:2036440-2048462	38.8564	38.728	-0.00477529	0.9947	0.997354	no
XLOC_000799	PA1876	gi|110227054|gb|AE004091.2|:2036440-2048462	33.7365	25.7353	-0.390561	0.8081	0.995483	no
XLOC_000078	PA0164	gi|110227054|gb|AE004091.2|:186801-196814	45.3889	24.8575	-0.868662	0.38735	0.995483	no
XLOC_000799	PA1877	gi|110227054|gb|AE004091.2|:2036440-2048462	22.2812	8.54739	-1.38227	0.57515	0.995483	no
XLOC_000799	PA1875	gi|110227054|gb|AE004091.2|:2036440-2048462	11.5872	14.7315	0.346373	0.7214	0.995483	no
XLOC_000800	PA1883	gi|110227054|gb|AE004091.2|:2052842-2054245	0.00886143	0	#NAME?	1	1	no
XLOC_000800	PA1882	gi|110227054|gb|AE004091.2|:2052842-2054245	18.1664	19.2093	0.0805282	0.94235	0.995483	no
XLOC_000801	polB	gi|110227054|gb|AE004091.2|:2054275-2070203	0	0.0272888	inf	1	1	no
XLOC_000801	PA1885	gi|110227054|gb|AE004091.2|:2054275-2070203	58.432	87.2325	0.578107	0.6749	0.995483	no
XLOC_000802	PA1889	gi|110227054|gb|AE004091.2|:2054275-2070203	72.5169	101.575	0.486155	0.78165	0.995483	no
XLOC_000803	qscR	gi|110227054|gb|AE004091.2|:2054275-2070203	32.5088	61.5934	0.921945	0.75385	0.995483	no
XLOC_000804	phzA2	gi|110227054|gb|AE004091.2|:2070684-2071173	0	6.95909	inf	0.01235	0.995483	no
XLOC_000805	phzB2	gi|110227054|gb|AE004091.2|:2071208-2071697	4.15014	35.9553	3.11497	0.10035	0.995483	no
XLOC_000079	PA0182	gi|110227054|gb|AE004091.2|:207070-207823	2.15732	4.26511	0.983346	1	1	no
XLOC_000806	phzE2	gi|110227054|gb|AE004091.2|:2071720-2075438	0	0	0	1	1	no
XLOC_000806	phzD2	gi|110227054|gb|AE004091.2|:2071720-2075438	0	0	0	1	1	no
XLOC_000806	phzC2	gi|110227054|gb|AE004091.2|:2071720-2075438	0	4.97777	inf	0.00045	0.274837	no
XLOC_000807	phzF2	gi|110227054|gb|AE004091.2|:2075451-2076288	0	0	0	1	1	no
XLOC_000808	phzG2	gi|110227054|gb|AE004091.2|:2076310-2076958	0	0	0	1	1	no
XLOC_000809	PA1923	gi|110227054|gb|AE004091.2|:2097490-2106447	2.60476	5.75759	1.14432	0.462	0.995483	no
XLOC_000809	PA1922	gi|110227054|gb|AE004091.2|:2097490-2106447	1.34874	3.8396	1.50935	1	1	no
XLOC_000809	PA1924	gi|110227054|gb|AE004091.2|:2097490-2106447	0	1.20953	inf	1	1	no
XLOC_000809	PA1925	gi|110227054|gb|AE004091.2|:2097490-2106447	0	2.60237	inf	1	1	no
XLOC_000810	PA1926	gi|110227054|gb|AE004091.2|:2097490-2106447	32.0309	21.1008	-0.602166	0.4319	0.995483	no
XLOC_000080	PA0186	gi|110227054|gb|AE004091.2|:212339-213401	14.5015	21.5428	0.571003	0.4084	0.995483	no
XLOC_000811	metE	gi|110227054|gb|AE004091.2|:2106579-2108880	8.48088	16.4271	0.953796	0.15455	0.995483	no
XLOC_000812	PA1930	gi|110227054|gb|AE004091.2|:2110225-2111521	81.9448	98.3485	0.26325	0.6465	0.995483	no
XLOC_000813	PA1933	gi|110227054|gb|AE004091.2|:2111690-2115390	167.976	260.887	0.635171	0.2993	0.995483	no
XLOC_000813	PA1932	gi|110227054|gb|AE004091.2|:2111690-2115390	21.8585	34.6067	0.662856	0.64245	0.995483	no
XLOC_000813	PA1931	gi|110227054|gb|AE004091.2|:2111690-2115390	45.9435	73.9547	0.686781	0.70825	0.995483	no
XLOC_000814	PA1934	gi|110227054|gb|AE004091.2|:2115884-2116265	86.7231	57.039	-0.604467	0.40855	0.995483	no
XLOC_000815	PA1938	gi|110227054|gb|AE004091.2|:2118584-2137785	0	0	0	1	1	no
XLOC_000815	PA1937	gi|110227054|gb|AE004091.2|:2118584-2137785	31.5691	32.7386	0.0524794	0.97525	0.995483	no
XLOC_000816	rbsA	gi|110227054|gb|AE004091.2|:2118584-2137785	0	0	0	1	1	no
XLOC_000816	rbsC	gi|110227054|gb|AE004091.2|:2118584-2137785	0	0	0	1	1	no
XLOC_000010	PA0021	gi|110227054|gb|AE004091.2|:22871-23960	10.712	12.9144	0.269748	0.7208	0.995483	no
XLOC_000081	PA0188	gi|110227054|gb|AE004091.2|:213818-215512	2.621	4.45128	0.764104	1	1	no
XLOC_000816	rbsR	gi|110227054|gb|AE004091.2|:2118584-2137785	0.0718396	8.29686	6.85164	0.2296	0.995483	no
XLOC_000816	rbsK	gi|110227054|gb|AE004091.2|:2118584-2137785	88.1831	132.132	0.583405	0.725	0.995483	no
XLOC_000816	rbsB	gi|110227054|gb|AE004091.2|:2118584-2137785	21.9555	8.35139	-1.39449	0.6289	0.995483	no
XLOC_000816	PA1945	gi|110227054|gb|AE004091.2|:2118584-2137785	0	0	0	1	1	no
XLOC_000816	PA1944	gi|110227054|gb|AE004091.2|:2118584-2137785	29.5928	31.3298	0.0822899	0.96425	0.995483	no
XLOC_000817	bacA	gi|110227054|gb|AE004091.2|:2137845-2145893	35.6317	31.3696	-0.183795	0.86695	0.995483	no
XLOC_000817	PA1960	gi|110227054|gb|AE004091.2|:2137845-2145893	0.555652	9.36718	4.07536	0.4602	0.995483	no
XLOC_000818	PA1963	gi|110227054|gb|AE004091.2|:2145893-2149189	137.416	134.17	-0.0344948	0.59085	0.995483	no
XLOC_000818	azoR2	gi|110227054|gb|AE004091.2|:2145893-2149189	92.6566	77.4294	-0.259013	0.79105	0.995483	no
XLOC_000819	PA1965	gi|110227054|gb|AE004091.2|:2145893-2149189	80.3593	75.4666	-0.090626	0.51505	0.995483	no
XLOC_000081	PA0187	gi|110227054|gb|AE004091.2|:213818-215512	13.5487	8.7569	-0.629661	0.48705	0.995483	no
XLOC_000820	PA1966	gi|110227054|gb|AE004091.2|:2149471-2149843	14.0531	42.5585	1.59856	0.13595	0.995483	no
XLOC_000821	PA1969	gi|110227054|gb|AE004091.2|:2149863-2153068	193.823	64.9829	-1.57661	0.4388	0.995483	no
XLOC_000821	PA1968	gi|110227054|gb|AE004091.2|:2149863-2153068	92.6918	117.508	0.342243	0.7136	0.995483	no
XLOC_000822	PA1972	gi|110227054|gb|AE004091.2|:2153593-2155297	3.55635	5.1714	0.540159	0.52845	0.995483	no
XLOC_000823	pqqF	gi|110227054|gb|AE004091.2|:2155373-2157701	27.3522	22.8975	-0.256468	0.6624	0.995483	no
XLOC_000824	PA1974	gi|110227054|gb|AE004091.2|:2157967-2159167	2.97473	4.72928	0.668862	0.51905	0.995483	no
XLOC_000825	PA1975	gi|110227054|gb|AE004091.2|:2159227-2169901	0	0.915506	inf	1	1	no
XLOC_000825	ercS%27	gi|110227054|gb|AE004091.2|:2159227-2169901	8.73878	6.10502	-0.517436	0.65325	0.995483	no
XLOC_000826	eraR	gi|110227054|gb|AE004091.2|:2159227-2169901	1.25697	5.50454	2.13068	0.53655	0.995483	no
XLOC_000826	eraS	gi|110227054|gb|AE004091.2|:2159227-2169901	6.63243	17.1023	1.36658	0.49975	0.995483	no
XLOC_000082	PA0190	gi|110227054|gb|AE004091.2|:217155-217881	3.4031	8.32507	1.29061	0.2947	0.995483	no
XLOC_000827	exaB	gi|110227054|gb|AE004091.2|:2159227-2169901	2.52581	8.43069	1.73891	0.57605	0.995483	no
XLOC_000828	exaC	gi|110227054|gb|AE004091.2|:2169987-2171508	1.35007	3.32692	1.30115	1	1	no
XLOC_000829	pqqA	gi|110227054|gb|AE004091.2|:2171864-2171936	0	0	0	1	1	no
XLOC_000830	pqqB	gi|110227054|gb|AE004091.2|:2171988-2172903	7.49845	6.60605	-0.182806	0.8442	0.995483	no
XLOC_000831	pqqD	gi|110227054|gb|AE004091.2|:2172912-2175057	61.7309	65.4853	0.0851785	0.9538	0.995483	no
XLOC_000831	pqqE	gi|110227054|gb|AE004091.2|:2172912-2175057	34.5962	20.7074	-0.740469	0.34895	0.995483	no
XLOC_000831	pqqC	gi|110227054|gb|AE004091.2|:2172912-2175057	17.2585	21.3256	0.305274	0.80055	0.995483	no
XLOC_000832	pqqH	gi|110227054|gb|AE004091.2|:2175061-2176888	21.9131	12.2648	-0.837263	0.1932	0.995483	no
XLOC_000833	ercS	gi|110227054|gb|AE004091.2|:2176973-2179815	34.1879	36.4173	0.091137	0.91125	0.995483	no
XLOC_000833	PA1991	gi|110227054|gb|AE004091.2|:2176973-2179815	75.3031	44.4982	-0.758961	0.3156	0.995483	no
XLOC_000083	pntAA	gi|110227054|gb|AE004091.2|:217904-232000	58.6184	57.6077	-0.0250923	0.7062	0.995483	no
XLOC_000834	dhcA	gi|110227054|gb|AE004091.2|:2185526-2186225	904.284	1164.74	0.365163	0.5602	0.995483	no
XLOC_000835	dhcB	gi|110227054|gb|AE004091.2|:2186259-2186916	463.932	545.682	0.234147	0.6879	0.995483	no
XLOC_000836	atoB	gi|110227054|gb|AE004091.2|:2187064-2188246	326.573	440.636	0.43218	0.485	0.995483	no
XLOC_000837	PA2002	gi|110227054|gb|AE004091.2|:2188458-2189883	30.5791	33.3864	0.12671	0.8329	0.995483	no
XLOC_000838	PA2010	gi|110227054|gb|AE004091.2|:2198890-2199694	83.9029	108.834	0.375336	0.5281	0.995483	no
XLOC_000839	PA2017	gi|110227054|gb|AE004091.2|:2206998-2207928	32.6386	77.1885	1.24181	0.0564	0.995483	no
XLOC_000840	PA2020	gi|110227054|gb|AE004091.2|:2212676-2213309	234.57	296.011	0.335631	0.55255	0.995483	no
XLOC_000841	PA2022	gi|110227054|gb|AE004091.2|:2213692-2215054	9.72367	12.5061	0.363057	0.6065	0.995483	no
XLOC_000842	galU	gi|110227054|gb|AE004091.2|:2215101-2215941	745.963	461.023	-0.694264	0.24555	0.995483	no
XLOC_000843	gor	gi|110227054|gb|AE004091.2|:2216687-2218043	271.622	294.683	0.117564	0.8476	0.995483	no
XLOC_000083	PA0194	gi|110227054|gb|AE004091.2|:217904-232000	0	0	0	1	1	no
XLOC_000844	PA2029	gi|110227054|gb|AE004091.2|:2219252-2226405	0	5.43486	inf	0.2458	0.995483	no
XLOC_000844	PA2028	gi|110227054|gb|AE004091.2|:2219252-2226405	39.8836	20.2877	-0.975193	0.5552	0.995483	no
XLOC_000845	PA2034	gi|110227054|gb|AE004091.2|:2219252-2226405	0.824446	0	#NAME?	1	1	no
XLOC_000845	PA2033	gi|110227054|gb|AE004091.2|:2219252-2226405	0	0	0	1	1	no
XLOC_000845	PA2032	gi|110227054|gb|AE004091.2|:2219252-2226405	24.2251	39.4763	0.704484	0.5137	0.995483	no
XLOC_000846	PA2036	gi|110227054|gb|AE004091.2|:2226878-2227400	1.86027	7.295	1.9714	0.33635	0.995483	no
XLOC_000847	PA2037	gi|110227054|gb|AE004091.2|:2227540-2230183	70.103	63.1962	-0.14964	0.80565	0.995483	no
XLOC_000848	PA2042	gi|110227054|gb|AE004091.2|:2230190-2238366	24.667	5.37704	-2.1977	0.56375	0.995483	no
XLOC_000848	PA2043	gi|110227054|gb|AE004091.2|:2230190-2238366	0	0	0	1	1	no
XLOC_000848	PA2041	gi|110227054|gb|AE004091.2|:2230190-2238366	0	0	0	1	1	no
XLOC_000083	PA0193	gi|110227054|gb|AE004091.2|:217904-232000	0	0	0	1	1	no
XLOC_000848	PA2040	gi|110227054|gb|AE004091.2|:2230190-2238366	116.354	55.7764	-1.06079	0.1619	0.995483	no
XLOC_000849	PA2048	gi|110227054|gb|AE004091.2|:2241815-2242112	12.6047	16.8834	0.42164	0.7569	0.995483	no
XLOC_000850	PA2051	gi|110227054|gb|AE004091.2|:2244491-2249582	2.37181	3.48084	0.55345	1	1	no
XLOC_000850	PA2050	gi|110227054|gb|AE004091.2|:2244491-2249582	0	7.70887	inf	0.22465	0.995483	no
XLOC_000851	cynR	gi|110227054|gb|AE004091.2|:2244491-2249582	27.7939	40.8119	0.55422	0.5144	0.995483	no
XLOC_000852	PA2056	gi|110227054|gb|AE004091.2|:2249692-2250595	11.0168	7.67806	-0.520895	0.53345	0.995483	no
XLOC_000853	PA2057	gi|110227054|gb|AE004091.2|:2251274-2253815	6.08818	7.66178	0.331669	0.6277	0.995483	no
XLOC_000854	PA2058	gi|110227054|gb|AE004091.2|:2253818-2255627	1.47725	5.46519	1.88736	0.10485	0.995483	no
XLOC_000855	PA2059	gi|110227054|gb|AE004091.2|:2255628-2256702	4.08619	9.65823	1.241	0.20215	0.995483	no
XLOC_000856	PA2060	gi|110227054|gb|AE004091.2|:2256703-2257720	2.91493	2.89225	-0.0112725	1	1	no
XLOC_000083	pntAB	gi|110227054|gb|AE004091.2|:217904-232000	21.9258	6.01872	-1.8651	0.5636	0.995483	no
XLOC_000857	PA2061	gi|110227054|gb|AE004091.2|:2257721-2259332	8.84632	11.023	0.317363	0.6492	0.995483	no
XLOC_000858	PA2062	gi|110227054|gb|AE004091.2|:2259477-2260659	9.08831	12.0392	0.405659	0.5862	0.995483	no
XLOC_000859	PA2063	gi|110227054|gb|AE004091.2|:2260861-2262085	19.1716	29.0323	0.598689	0.3538	0.995483	no
XLOC_000860	fusA2	gi|110227054|gb|AE004091.2|:2269474-2274568	51.9664	51.9259	-0.00112662	0.99545	0.997492	no
XLOC_000861	PA2072	gi|110227054|gb|AE004091.2|:2274739-2277334	25.7865	47.903	0.893502	0.13185	0.995483	no
XLOC_000862	PA2074	gi|110227054|gb|AE004091.2|:2277551-2279794	0.972525	8.24957	3.08451	0.245	0.995483	no
XLOC_000862	PA2073	gi|110227054|gb|AE004091.2|:2277551-2279794	3.38108	5.217	0.625736	0.51465	0.995483	no
XLOC_000863	PA2076	gi|110227054|gb|AE004091.2|:2282479-2283382	6.77959	8.15794	0.267007	0.7682	0.995483	no
XLOC_000864	PA2082	gi|110227054|gb|AE004091.2|:2287379-2293065	56.3165	60.4763	0.102811	0.70045	0.995483	no
XLOC_000865	PA2083	gi|110227054|gb|AE004091.2|:2287379-2293065	10.513	9.74353	-0.109653	0.58135	0.995483	no
XLOC_000083	pntB	gi|110227054|gb|AE004091.2|:217904-232000	48.8407	35.0317	-0.479423	0.65015	0.995483	no
XLOC_000866	PA2090	gi|110227054|gb|AE004091.2|:2293152-2306627	0	0	0	1	1	no
XLOC_000866	PA2091	gi|110227054|gb|AE004091.2|:2293152-2306627	0	0	0	1	1	no
XLOC_000866	PA2089	gi|110227054|gb|AE004091.2|:2293152-2306627	7.707	18.9907	1.30105	0.3085	0.995483	no
XLOC_000866	PA2092	gi|110227054|gb|AE004091.2|:2293152-2306627	0.389031	2.91283	2.90446	1	1	no
XLOC_000866	PA2088	gi|110227054|gb|AE004091.2|:2293152-2306627	0.238156	0	#NAME?	1	1	no
XLOC_000866	PA2087	gi|110227054|gb|AE004091.2|:2293152-2306627	3.42159	0	#NAME?	1	1	no
XLOC_000866	PA2093	gi|110227054|gb|AE004091.2|:2293152-2306627	1.22627	0	#NAME?	1	1	no
XLOC_000866	PA2094	gi|110227054|gb|AE004091.2|:2293152-2306627	0	8.29299	inf	0.20005	0.995483	no
XLOC_000866	PA2086	gi|110227054|gb|AE004091.2|:2293152-2306627	0.613937	0	#NAME?	1	1	no
XLOC_000866	PA2085	gi|110227054|gb|AE004091.2|:2293152-2306627	6.85457	2.72753	-1.32947	0.62945	0.995483	no
XLOC_000083	PA0192	gi|110227054|gb|AE004091.2|:217904-232000	22.5868	24.7713	0.133187	0.9085	0.995483	no
XLOC_000866	PA2084	gi|110227054|gb|AE004091.2|:2293152-2306627	18.189	13.4735	-0.43294	0.6718	0.995483	no
XLOC_000867	PA2099	gi|110227054|gb|AE004091.2|:2307956-2311112	0.251257	2.9715	3.56396	1	1	no
XLOC_000867	PA2098	gi|110227054|gb|AE004091.2|:2307956-2311112	6.35928	5.57526	-0.189824	0.91305	0.995483	no
XLOC_000867	PA2097	gi|110227054|gb|AE004091.2|:2307956-2311112	4.21213	9.28013	1.13959	0.1247	0.995483	no
XLOC_000868	PA2101	gi|110227054|gb|AE004091.2|:2312898-2313789	43.1117	60.0454	0.477975	0.43935	0.995483	no
XLOC_000869	PA2102	gi|110227054|gb|AE004091.2|:2313790-2314249	64.9164	100.82	0.635131	0.3354	0.995483	no
XLOC_000870	PA2103	gi|110227054|gb|AE004091.2|:2314511-2315690	54.0897	60.38	0.158716	0.7943	0.995483	no
XLOC_000871	PA2104	gi|110227054|gb|AE004091.2|:2315708-2316626	37.3349	66.2556	0.827516	0.19165	0.995483	no
XLOC_000872	PA2106	gi|110227054|gb|AE004091.2|:2316707-2318134	49.0674	64.2274	0.388424	0.66875	0.995483	no
XLOC_000872	PA2105	gi|110227054|gb|AE004091.2|:2316707-2318134	68.5952	67.8877	-0.014957	0.98865	0.996	no
XLOC_000083	tonB2	gi|110227054|gb|AE004091.2|:217904-232000	0	0	0	1	1	no
XLOC_000873	PA2108	gi|110227054|gb|AE004091.2|:2318794-2320567	7.9334	15.91	1.00393	0.13565	0.995483	no
XLOC_000874	PA2115	gi|110227054|gb|AE004091.2|:2326333-2327287	26.0661	42.0703	0.690625	0.28725	0.995483	no
XLOC_000875	PA2116	gi|110227054|gb|AE004091.2|:2327393-2332907	185.451	293.121	0.660453	0.6136	0.995483	no
XLOC_000876	ada	gi|110227054|gb|AE004091.2|:2327393-2332907	30.5754	39.2436	0.360084	0.8844	0.995483	no
XLOC_000877	PA2122	gi|110227054|gb|AE004091.2|:2333998-2335135	18.4175	20.5452	0.157725	0.81055	0.995483	no
XLOC_000878	PA2123	gi|110227054|gb|AE004091.2|:2335171-2336104	25.191	29.921	0.248252	0.701	0.995483	no
XLOC_000879	PA2125	gi|110227054|gb|AE004091.2|:2336208-2339316	4.21821	10.3711	1.29787	0.27005	0.995483	no
XLOC_000879	PA2124	gi|110227054|gb|AE004091.2|:2336208-2339316	3.90823	8.2251	1.07352	0.2252	0.995483	no
XLOC_000880	cupA1	gi|110227054|gb|AE004091.2|:2342492-2343044	255.04	147.888	-0.786214	0.1877	0.995483	no
XLOC_000881	cupA5	gi|110227054|gb|AE004091.2|:2343131-2349395	0.905689	3.58778	1.986	1	1	no
XLOC_000011	PA0022	gi|110227054|gb|AE004091.2|:24000-24558	240.697	174.518	-0.463848	0.42245	0.995483	no
XLOC_000083	exbB1	gi|110227054|gb|AE004091.2|:217904-232000	0	17.0979	inf	0.10405	0.995483	no
XLOC_000881	cupA5	gi|110227054|gb|AE004091.2|:2343131-2349395	5.80508	1.96575	-1.56224	0.53	0.995483	no
XLOC_000881	cupA4	gi|110227054|gb|AE004091.2|:2343131-2349395	6.65304	7.85265	0.239167	0.8584	0.995483	no
XLOC_000881	cupA3	gi|110227054|gb|AE004091.2|:2343131-2349395	6.13709	9.51365	0.632445	0.45735	0.995483	no
XLOC_000881	cupA2	gi|110227054|gb|AE004091.2|:2343131-2349395	7.63392	8.62325	0.175808	0.9264	0.995483	no
XLOC_000882	PA2134	gi|110227054|gb|AE004091.2|:2349487-2350060	4.81112	9.90939	1.04242	0.35915	0.995483	no
XLOC_000883	PA2135	gi|110227054|gb|AE004091.2|:2350088-2351453	7.14631	3.7712	-0.922175	0.309	0.995483	no
XLOC_000884	PA2137	gi|110227054|gb|AE004091.2|:2352531-2353068	10.66	20.92	0.97267	0.32765	0.995483	no
XLOC_000885	PA2138	gi|110227054|gb|AE004091.2|:2353085-2355608	4.09028	4.37041	0.0955712	1	1	no
XLOC_000886	glgP	gi|110227054|gb|AE004091.2|:2355683-2361875	6.68359	9.93361	0.571696	0.698	0.995483	no
XLOC_000886	PA2143	gi|110227054|gb|AE004091.2|:2355683-2361875	11.694	22.4039	0.937983	0.7065	0.995483	no
XLOC_000083	exbD1	gi|110227054|gb|AE004091.2|:217904-232000	25.9096	55.3876	1.09608	0.68375	0.995483	no
XLOC_000886	PA2142	gi|110227054|gb|AE004091.2|:2355683-2361875	5.61693	6.52057	0.215216	0.60925	0.995483	no
XLOC_000886	PA2141	gi|110227054|gb|AE004091.2|:2355683-2361875	0	0	0	1	1	no
XLOC_000886	PA2140	gi|110227054|gb|AE004091.2|:2355683-2361875	0	0	0	1	1	no
XLOC_000887	PA2146	gi|110227054|gb|AE004091.2|:2355683-2361875	0	0	0	1	1	no
XLOC_000888	katE	gi|110227054|gb|AE004091.2|:2361953-2364083	7.38683	6.31067	-0.227164	0.7461	0.995483	no
XLOC_000889	PA2148	gi|110227054|gb|AE004091.2|:2364310-2364802	6.16054	11.4806	0.898068	0.4954	0.995483	no
XLOC_000890	PA2149	gi|110227054|gb|AE004091.2|:2364815-2365058	0	0	0	1	1	no
XLOC_000891	PA2150	gi|110227054|gb|AE004091.2|:2365080-2365962	3.49467	6.42963	0.879581	0.4363	0.995483	no
XLOC_000892	glgB	gi|110227054|gb|AE004091.2|:2366105-2373608	0	0	0	1	1	no
XLOC_000892	PA2152	gi|110227054|gb|AE004091.2|:2366105-2373608	4.51274	4.20799	-0.100872	0.938	0.995483	no
XLOC_000083	PA0201	gi|110227054|gb|AE004091.2|:217904-232000	121.099	71.4194	-0.761796	0.7186	0.995483	no
XLOC_000892	PA2151	gi|110227054|gb|AE004091.2|:2366105-2373608	5.62441	6.83462	0.281157	0.71875	0.995483	no
XLOC_000893	PA2168	gi|110227054|gb|AE004091.2|:2373609-2395912	0	0	0	1	1	no
XLOC_000893	PA2167	gi|110227054|gb|AE004091.2|:2373609-2395912	4.40101	3.84235	-0.195846	1	1	no
XLOC_000893	PA2170	gi|110227054|gb|AE004091.2|:2373609-2395912	0	0	0	1	1	no
XLOC_000893	PA2171	gi|110227054|gb|AE004091.2|:2373609-2395912	6.29116	14.2343	1.17797	0.67675	0.995483	no
XLOC_000893	PA2173	gi|110227054|gb|AE004091.2|:2373609-2395912	4.62148	6.51197	0.49474	0.68485	0.995483	no
XLOC_000893	PA2172	gi|110227054|gb|AE004091.2|:2373609-2395912	4.23018	2.75525	-0.618539	1	1	no
XLOC_000893	PA2173a	gi|110227054|gb|AE004091.2|:2373609-2395912	0	5.39473	inf	0.185	0.995483	no
XLOC_000893	PA2169	gi|110227054|gb|AE004091.2|:2373609-2395912	0	0	0	1	1	no
XLOC_000893	PA2166	gi|110227054|gb|AE004091.2|:2373609-2395912	68.2723	79.9686	0.228133	0.86435	0.995483	no
XLOC_000084	PA0207	gi|110227054|gb|AE004091.2|:236217-237111	66.1037	77.7718	0.234516	0.7013	0.995483	no
XLOC_000894	PA2177	gi|110227054|gb|AE004091.2|:2397568-2399668	13.1314	32.7629	1.31904	0.0356	0.995483	no
XLOC_000895	PA2181	gi|110227054|gb|AE004091.2|:2400654-2411480	5.08235	8.85076	0.800308	0.7109	0.995483	no
XLOC_000896	PA2187	gi|110227054|gb|AE004091.2|:2400654-2411480	0	0	0	1	1	no
XLOC_000896	katN	gi|110227054|gb|AE004091.2|:2400654-2411480	10.5757	17.4836	0.725249	0.6049	0.995483	no
XLOC_000897	PA2190	gi|110227054|gb|AE004091.2|:2400654-2411480	38.9137	58.5009	0.588182	0.47885	0.995483	no
XLOC_000897	PA2189	gi|110227054|gb|AE004091.2|:2400654-2411480	18.6854	27.3984	0.552182	0.61555	0.995483	no
XLOC_000898	PA2192	gi|110227054|gb|AE004091.2|:2411708-2412122	2.81339	7.80198	1.47153	0.44675	0.995483	no
XLOC_000899	hcnB	gi|110227054|gb|AE004091.2|:2412545-2414251	7.46402	24.6061	1.72099	0.02805	0.995483	no
XLOC_000899	hcnA	gi|110227054|gb|AE004091.2|:2412545-2414251	10.5987	111.764	3.39849	0.178	0.995483	no
XLOC_000900	hcnC	gi|110227054|gb|AE004091.2|:2414253-2415507	27.0898	95.8447	1.82295	0.0057	0.960352	no
XLOC_000085	mdcA	gi|110227054|gb|AE004091.2|:237231-239777	23.589	109.304	2.21216	0.20445	0.995483	no
XLOC_000901	PA2196	gi|110227054|gb|AE004091.2|:2415660-2416245	52.8123	68.0944	0.366662	0.57295	0.995483	no
XLOC_000902	PA2198	gi|110227054|gb|AE004091.2|:2416375-2417754	12.5447	16.0071	0.351634	0.8549	0.995483	no
XLOC_000902	PA2197	gi|110227054|gb|AE004091.2|:2416375-2417754	22.0224	19.3374	-0.187579	0.78055	0.995483	no
XLOC_000903	PA2199	gi|110227054|gb|AE004091.2|:2417759-2418635	54.6504	71.8497	0.39475	0.51465	0.995483	no
XLOC_000904	PA2200	gi|110227054|gb|AE004091.2|:2418722-2420318	11.4963	16.2273	0.49725	0.4555	0.995483	no
XLOC_000905	PA2201	gi|110227054|gb|AE004091.2|:2420442-2421327	20.8757	16.7426	-0.318299	0.6546	0.995483	no
XLOC_000906	PA2212	gi|110227054|gb|AE004091.2|:2428851-2432139	2.92572	4.56165	0.640763	0.67515	0.995483	no
XLOC_000906	PA2211	gi|110227054|gb|AE004091.2|:2428851-2432139	7.8362	3.99634	-0.971476	0.507	0.995483	no
XLOC_000906	PA2210	gi|110227054|gb|AE004091.2|:2428851-2432139	4.22545	6.00223	0.506394	0.64815	0.995483	no
XLOC_000907	PA2213	gi|110227054|gb|AE004091.2|:2432311-2433562	1.13198	2.5717	1.18388	1	1	no
XLOC_000085	mdcA	gi|110227054|gb|AE004091.2|:237231-239777	95.7433	191.577	1.00068	0.11575	0.995483	no
XLOC_000908	PA2214	gi|110227054|gb|AE004091.2|:2433747-2435070	1.58879	4.21275	1.40684	1	1	no
XLOC_000909	PA2215	gi|110227054|gb|AE004091.2|:2435100-2436276	7.92511	7.2678	-0.124913	0.8804	0.995483	no
XLOC_000910	PA2216	gi|110227054|gb|AE004091.2|:2436303-2437299	6.73233	5.93649	-0.181495	0.8442	0.995483	no
XLOC_000911	PA2217	gi|110227054|gb|AE004091.2|:2437427-2439011	3.00643	6.10735	1.02249	0.25245	0.995483	no
XLOC_000912	PA2221	gi|110227054|gb|AE004091.2|:2440346-2452426	0	0	0	1	1	no
XLOC_000912	PA2220	gi|110227054|gb|AE004091.2|:2440346-2452426	65.4646	58.8906	-0.152677	0.9334	0.995483	no
XLOC_000913	PA2229	gi|110227054|gb|AE004091.2|:2440346-2452426	64.2621	71.2508	0.148939	0.6053	0.995483	no
XLOC_000914	PA2230	gi|110227054|gb|AE004091.2|:2452468-2453140	32.8909	27.8135	-0.241905	0.72215	0.995483	no
XLOC_000915	pslC	gi|110227054|gb|AE004091.2|:2453666-2457480	71.1185	73.4452	0.0464436	0.97555	0.995483	no
XLOC_000915	pslB	gi|110227054|gb|AE004091.2|:2453666-2457480	80.7114	73.3691	-0.137601	0.90395	0.995483	no
XLOC_000086	mdcE	gi|110227054|gb|AE004091.2|:239778-241737	35.3588	129.959	1.87791	0.04645	0.995483	no
XLOC_000915	pslA	gi|110227054|gb|AE004091.2|:2453666-2457480	190.823	137.172	-0.476252	0.54415	0.995483	no
XLOC_000916	pslD	gi|110227054|gb|AE004091.2|:2457509-2458280	92.9572	84.3987	-0.139346	0.8191	0.995483	no
XLOC_000917	pslG	gi|110227054|gb|AE004091.2|:2458294-2462788	77.4357	56.5708	-0.452942	0.6847	0.995483	no
XLOC_000917	pslF	gi|110227054|gb|AE004091.2|:2458294-2462788	47.5735	30.4287	-0.644724	0.7084	0.995483	no
XLOC_000917	pslE	gi|110227054|gb|AE004091.2|:2458294-2462788	88.0029	44.2465	-0.991987	0.2267	0.995483	no
XLOC_000918	pslI	gi|110227054|gb|AE004091.2|:2462796-2465099	40.1594	20.919	-0.940925	0.4392	0.995483	no
XLOC_000918	pslH	gi|110227054|gb|AE004091.2|:2462796-2465099	94.3396	55.2424	-0.772088	0.23555	0.995483	no
XLOC_000919	pslJ	gi|110227054|gb|AE004091.2|:2465101-2466538	42.779	42.0806	-0.0237469	0.9688	0.995483	no
XLOC_000920	pslK	gi|110227054|gb|AE004091.2|:2466539-2467949	28.9936	27.9332	-0.053753	0.9332	0.995483	no
XLOC_000921	pslL	gi|110227054|gb|AE004091.2|:2468031-2469099	48.6888	31.1192	-0.645784	0.29775	0.995483	no
XLOC_000086	mdcD	gi|110227054|gb|AE004091.2|:239778-241737	18.8468	125.459	2.73482	0.0148	0.995483	no
XLOC_000922	pslM	gi|110227054|gb|AE004091.2|:2469285-2471019	5.81108	9.25912	0.672068	0.373	0.995483	no
XLOC_000923	pslN	gi|110227054|gb|AE004091.2|:2471074-2472076	14.1059	47.5589	1.75341	0.0161	0.995483	no
XLOC_000924	lpdV	gi|110227054|gb|AE004091.2|:2472441-2479130	238.132	1019.8	2.09845	0.317	0.995483	no
XLOC_000924	bkdB	gi|110227054|gb|AE004091.2|:2472441-2479130	118.594	673.842	2.50637	0.3137	0.995483	no
XLOC_000924	bkdA2	gi|110227054|gb|AE004091.2|:2472441-2479130	0	137.221	inf	0.0817	0.995483	no
XLOC_000924	bkdA1	gi|110227054|gb|AE004091.2|:2472441-2479130	11.6959	0	#NAME?	0.04095	0.995483	no
XLOC_000925	PA2252	gi|110227054|gb|AE004091.2|:2479298-2480744	6.20336	13.0215	1.06978	0.16485	0.995483	no
XLOC_000926	ansA	gi|110227054|gb|AE004091.2|:2480843-2481830	32.5349	35.5958	0.129717	0.83745	0.995483	no
XLOC_000927	pvcA	gi|110227054|gb|AE004091.2|:2482044-2483031	8.32289	6.00411	-0.471134	0.60765	0.995483	no
XLOC_000928	pvcB	gi|110227054|gb|AE004091.2|:2483048-2483924	4.40729	3.99165	-0.142907	1	1	no
XLOC_000086	mdcC	gi|110227054|gb|AE004091.2|:239778-241737	18.3336	131.18	2.83899	0.26785	0.995483	no
XLOC_000929	pvcD	gi|110227054|gb|AE004091.2|:2483975-2486118	2.66659	3.00441	0.172087	1	1	no
XLOC_000929	pvcC	gi|110227054|gb|AE004091.2|:2483975-2486118	2.28128	4.41054	0.951112	1	1	no
XLOC_000930	ptxS	gi|110227054|gb|AE004091.2|:2487855-2488878	19.5318	18.458	-0.0815797	0.9075	0.995483	no
XLOC_000931	PA2261	gi|110227054|gb|AE004091.2|:2488949-2490675	8.72357	16.6255	0.930404	0.27695	0.995483	no
XLOC_000931	PA2260	gi|110227054|gb|AE004091.2|:2488949-2490675	4.09138	8.09366	0.984203	0.53	0.995483	no
XLOC_000932	PA2262	gi|110227054|gb|AE004091.2|:2490737-2492045	8.0518	7.62433	-0.0787012	0.9212	0.995483	no
XLOC_000933	PA2263	gi|110227054|gb|AE004091.2|:2492063-2493050	5.29638	4.28865	-0.304484	0.7773	0.995483	no
XLOC_000934	PA2264	gi|110227054|gb|AE004091.2|:2493217-2493934	23.0847	33.225	0.525328	0.4445	0.995483	no
XLOC_000935	PA2265	gi|110227054|gb|AE004091.2|:2493936-2495712	16.5906	13.9485	-0.250262	0.69095	0.995483	no
XLOC_000936	PA2266	gi|110227054|gb|AE004091.2|:2495723-2497043	15.3995	19.008	0.303721	0.65075	0.995483	no
XLOC_000087	PA0214	gi|110227054|gb|AE004091.2|:241752-243374	25.191	106.795	2.08387	0.0212	0.995483	no
XLOC_000937	PA2268	gi|110227054|gb|AE004091.2|:2498098-2503895	7.51726	18.9952	1.33735	0.54825	0.995483	no
XLOC_000938	pbpC	gi|110227054|gb|AE004091.2|:2498098-2503895	0	0	0	1	1	no
XLOC_000938	PA2271	gi|110227054|gb|AE004091.2|:2498098-2503895	11.0941	0	#NAME?	0.21285	0.995483	no
XLOC_000938	PA2270	gi|110227054|gb|AE004091.2|:2498098-2503895	64.4794	43.2695	-0.575489	0.4792	0.995483	no
XLOC_000939	PA2274	gi|110227054|gb|AE004091.2|:2503972-2504350	6.78546	39.279	2.53324	0.1192	0.995483	no
XLOC_000940	PA2276	gi|110227054|gb|AE004091.2|:2505470-2506535	11.0104	16.3941	0.574318	0.41765	0.995483	no
XLOC_000941	arsR	gi|110227054|gb|AE004091.2|:2506613-2506964	20.0603	24.1761	0.269239	0.7912	0.995483	no
XLOC_000942	arsB	gi|110227054|gb|AE004091.2|:2506977-2508261	7.13318	11.5331	0.693163	0.35925	0.995483	no
XLOC_000943	arsC	gi|110227054|gb|AE004091.2|:2508292-2508763	17.7164	8.65196	-1.03399	0.34565	0.995483	no
XLOC_000944	PA2280	gi|110227054|gb|AE004091.2|:2508774-2511050	12.108	9.56175	-0.340609	0.87005	0.995483	no
XLOC_000012	hemF	gi|110227054|gb|AE004091.2|:25735-26653	105.367	55.4479	-0.926223	0.12475	0.995483	no
XLOC_000087	PA0213	gi|110227054|gb|AE004091.2|:241752-243374	33.9023	84.0068	1.30912	0.17865	0.995483	no
XLOC_000945	PA2282	gi|110227054|gb|AE004091.2|:2508774-2511050	13.1324	42.3279	1.68848	0.20675	0.995483	no
XLOC_000946	PA2285	gi|110227054|gb|AE004091.2|:2511056-2513841	5.15919	16.7195	1.69632	0.3525	0.995483	no
XLOC_000946	PA2284	gi|110227054|gb|AE004091.2|:2511056-2513841	8.85524	30.6661	1.79204	0.1293	0.995483	no
XLOC_000946	PA2283	gi|110227054|gb|AE004091.2|:2511056-2513841	2.83571	10.748	1.92229	0.1356	0.995483	no
XLOC_000947	PA2287	gi|110227054|gb|AE004091.2|:2513841-2527277	24.6647	119.602	2.27772	0.21285	0.995483	no
XLOC_000947	PA2286	gi|110227054|gb|AE004091.2|:2513841-2527277	7.07159	21.1143	1.57812	0.4031	0.995483	no
XLOC_000949	PA2311	gi|110227054|gb|AE004091.2|:2549747-2549906	293.68	0	#NAME?	0.11035	0.995483	no
XLOC_000950	PA2312	gi|110227054|gb|AE004091.2|:2549960-2550542	3.13121	5.27883	0.753497	0.61025	0.995483	no
XLOC_000951	PA2319	gi|110227054|gb|AE004091.2|:2551421-2560665	0	0	0	1	1	no
XLOC_000951	PA2317	gi|110227054|gb|AE004091.2|:2551421-2560665	0	0	0	1	1	no
XLOC_000088	PA0215	gi|110227054|gb|AE004091.2|:243430-243835	49.9606	154.646	1.63011	0.0287	0.995483	no
XLOC_000951	PA2318	gi|110227054|gb|AE004091.2|:2551421-2560665	83.9667	66.3447	-0.339835	0.4548	0.995483	no
XLOC_000951	PA2316	gi|110227054|gb|AE004091.2|:2551421-2560665	36.6958	36.2834	-0.0163073	0.9854	0.995483	no
XLOC_000952	PA2321	gi|110227054|gb|AE004091.2|:2551421-2560665	3.72054	16.6744	2.16406	0.5517	0.995483	no
XLOC_000953	PA2322	gi|110227054|gb|AE004091.2|:2560761-2562114	4.642	9.9655	1.1022	0.17915	0.995483	no
XLOC_000954	PA2323	gi|110227054|gb|AE004091.2|:2562446-2564072	6.669	8.53613	0.356112	0.63155	0.995483	no
XLOC_000955	PA2324	gi|110227054|gb|AE004091.2|:2564289-2565549	2.80584	2.86868	0.0319537	1	1	no
XLOC_000956	PA2325	gi|110227054|gb|AE004091.2|:2565579-2566815	2.87104	5.21765	0.861827	0.3926	0.995483	no
XLOC_000958	PA2332	gi|110227054|gb|AE004091.2|:2566874-2575992	45.3883	40.3072	-0.171283	0.883	0.995483	no
XLOC_000959	PA2335	gi|110227054|gb|AE004091.2|:2577149-2579519	1.64216	5.45779	1.73272	0.0766	0.995483	no
XLOC_000960	PA2336	gi|110227054|gb|AE004091.2|:2579541-2580882	2.08487	2.96177	0.506502	1	1	no
XLOC_000089	PA0216	gi|110227054|gb|AE004091.2|:243840-244605	15.8343	49.504	1.64449	0.03035	0.995483	no
XLOC_000961	mtlR	gi|110227054|gb|AE004091.2|:2581033-2581939	21.0958	17.2026	-0.294331	0.6721	0.995483	no
XLOC_000962	PA2338	gi|110227054|gb|AE004091.2|:2582096-2583407	4.28266	5.77888	0.432283	0.6475	0.995483	no
XLOC_000963	PA2339	gi|110227054|gb|AE004091.2|:2583482-2584415	7.31351	8.74614	0.258083	0.7793	0.995483	no
XLOC_000964	PA2340	gi|110227054|gb|AE004091.2|:2584425-2585259	6.58104	6.91399	0.0712034	0.93215	0.995483	no
XLOC_000965	PA2341	gi|110227054|gb|AE004091.2|:2585298-2586411	4.56287	8.50733	0.898765	0.3249	0.995483	no
XLOC_000966	mtlY	gi|110227054|gb|AE004091.2|:2586433-2589414	3.63327	6.19817	0.770572	0.41515	0.995483	no
XLOC_000966	mtlD	gi|110227054|gb|AE004091.2|:2586433-2589414	1.3978	2.64919	0.922393	1	1	no
XLOC_000967	mtlZ	gi|110227054|gb|AE004091.2|:2589454-2590387	10.564	15.1907	0.524035	0.49685	0.995483	no
XLOC_000968	PA2346	gi|110227054|gb|AE004091.2|:2592083-2627175	5.07262	7.13716	0.492619	0.8492	0.995483	no
XLOC_000968	PA2352	gi|110227054|gb|AE004091.2|:2592083-2627175	11.0081	10.3193	-0.0932093	0.9568	0.995483	no
XLOC_000090	PA0219	gi|110227054|gb|AE004091.2|:247218-248709	1.38152	5.49883	1.99287	0.12275	0.995483	no
XLOC_000968	PA2351	gi|110227054|gb|AE004091.2|:2592083-2627175	5.13847	4.37419	-0.232323	0.8778	0.995483	no
XLOC_000968	PA2350	gi|110227054|gb|AE004091.2|:2592083-2627175	0	0	0	1	1	no
XLOC_000968	PA2349	gi|110227054|gb|AE004091.2|:2592083-2627175	0	0	0	1	1	no
XLOC_000968	PA2348	gi|110227054|gb|AE004091.2|:2592083-2627175	0	0	0	1	1	no
XLOC_000968	PA2347	gi|110227054|gb|AE004091.2|:2592083-2627175	0.699412	1.14584	0.712188	1	1	no
XLOC_000969	PA2365	gi|110227054|gb|AE004091.2|:2592083-2627175	39.4794	16.4566	-1.26243	0.4379	0.995483	no
XLOC_000969	PA2371	gi|110227054|gb|AE004091.2|:2592083-2627175	2.96853	2.70177	-0.135847	1	1	no
XLOC_000969	PA2373	gi|110227054|gb|AE004091.2|:2592083-2627175	0	3.95345	inf	1	1	no
XLOC_000969	PA2374	gi|110227054|gb|AE004091.2|:2592083-2627175	0	0.928513	inf	1	1	no
XLOC_000969	PA2370	gi|110227054|gb|AE004091.2|:2592083-2627175	0	0	0	1	1	no
XLOC_000091	PA0220	gi|110227054|gb|AE004091.2|:248766-250200	13.9732	15.3391	0.134556	0.8345	0.995483	no
XLOC_000969	PA2369	gi|110227054|gb|AE004091.2|:2592083-2627175	0	0	0	1	1	no
XLOC_000969	PA2368	gi|110227054|gb|AE004091.2|:2592083-2627175	0	1.43896	inf	1	1	no
XLOC_000969	PA2367	gi|110227054|gb|AE004091.2|:2592083-2627175	29.555	6.30567	-2.22868	0.47125	0.995483	no
XLOC_000969	PA2366	gi|110227054|gb|AE004091.2|:2592083-2627175	16.7784	11.4043	-0.557022	0.841	0.995483	no
XLOC_000970	PA2376	gi|110227054|gb|AE004091.2|:2627451-2628093	10.8122	13.7021	0.341733	0.71225	0.995483	no
XLOC_000971	PA2377	gi|110227054|gb|AE004091.2|:2628224-2629499	6.08645	9.74353	0.678843	0.4123	0.995483	no
XLOC_000972	PA2381	gi|110227054|gb|AE004091.2|:2629747-2648410	1579.3	1349.56	-0.226801	0.868	0.995483	no
XLOC_000973	opmQ	gi|110227054|gb|AE004091.2|:2629747-2648410	0	0	0	1	1	no
XLOC_000973	pvdT	gi|110227054|gb|AE004091.2|:2629747-2648410	0	0	0	1	1	no
XLOC_000973	pvdR	gi|110227054|gb|AE004091.2|:2629747-2648410	0	0	0	1	1	no
XLOC_000092	PA0221	gi|110227054|gb|AE004091.2|:250230-251613	4.0213	6.85656	0.769823	0.3957	0.995483	no
XLOC_000973	fpvR	gi|110227054|gb|AE004091.2|:2629747-2648410	79.3064	108.07	0.446461	0.80315	0.995483	no
XLOC_000974	PA2393	gi|110227054|gb|AE004091.2|:2648625-2649972	0.518484	7.66043	3.88506	0.22125	0.995483	no
XLOC_000975	pvdN	gi|110227054|gb|AE004091.2|:2649994-2651278	5.48706	9.03946	0.720202	0.3835	0.995483	no
XLOC_000976	pvdO	gi|110227054|gb|AE004091.2|:2651306-2652161	4.54929	3.08926	-0.558381	0.67145	0.995483	no
XLOC_000977	pvdE	gi|110227054|gb|AE004091.2|:2653434-2655084	21.3147	30.7822	0.530248	0.39545	0.995483	no
XLOC_000978	fpvA	gi|110227054|gb|AE004091.2|:2655186-2693681	29.3244	34.9239	0.252113	0.86835	0.995483	no
XLOC_000979	PA2409	gi|110227054|gb|AE004091.2|:2655186-2693681	1.75195	0	#NAME?	1	1	no
XLOC_000979	PA2410	gi|110227054|gb|AE004091.2|:2655186-2693681	3.23918	12.4944	1.94758	0.58595	0.995483	no
XLOC_000979	PA2408	gi|110227054|gb|AE004091.2|:2655186-2693681	1.39911	12.4506	3.15364	0.4671	0.995483	no
XLOC_000979	PA2407	gi|110227054|gb|AE004091.2|:2655186-2693681	0	1.02725	inf	1	1	no
XLOC_000093	PA0222	gi|110227054|gb|AE004091.2|:251776-266310	4.85084	3.93052	-0.303513	0.87525	0.995483	no
XLOC_000979	PA2406	gi|110227054|gb|AE004091.2|:2655186-2693681	0	3.33949	inf	1	1	no
XLOC_000979	PA2405	gi|110227054|gb|AE004091.2|:2655186-2693681	0.976504	2.73508	1.48588	1	1	no
XLOC_000979	PA2404	gi|110227054|gb|AE004091.2|:2655186-2693681	0	0	0	1	1	no
XLOC_000979	PA2403	gi|110227054|gb|AE004091.2|:2655186-2693681	18.2189	36.647	1.00826	0.6829	0.995483	no
XLOC_000980	treA	gi|110227054|gb|AE004091.2|:2698525-2700163	5.78657	9.64075	0.736438	0.3383	0.995483	no
XLOC_000981	PA2418	gi|110227054|gb|AE004091.2|:2700166-2707570	16.5336	19.5107	0.238861	0.7308	0.995483	no
XLOC_000981	PA2419	gi|110227054|gb|AE004091.2|:2700166-2707570	0	0	0	1	1	no
XLOC_000981	PA2423	gi|110227054|gb|AE004091.2|:2700166-2707570	54.3321	62.0299	0.191158	0.89795	0.995483	no
XLOC_000981	PA2422	gi|110227054|gb|AE004091.2|:2700166-2707570	0	0	0	1	1	no
XLOC_000981	PA2421	gi|110227054|gb|AE004091.2|:2700166-2707570	0	0	0	1	1	no
XLOC_000094	PA0233	gi|110227054|gb|AE004091.2|:251776-266310	1.98693	0	#NAME?	1	1	no
XLOC_000981	PA2420	gi|110227054|gb|AE004091.2|:2700166-2707570	0	0	0	1	1	no
XLOC_000982	pvdS	gi|110227054|gb|AE004091.2|:2722174-2722738	8.21856	7.38348	-0.154585	0.89675	0.995483	no
XLOC_000983	PA2429	gi|110227054|gb|AE004091.2|:2724484-2725771	25.0318	58.0604	1.21379	0.52425	0.995483	no
XLOC_000984	bexR	gi|110227054|gb|AE004091.2|:2728541-2729456	10.8311	12.2684	0.179764	0.8277	0.995483	no
XLOC_000985	PA2433	gi|110227054|gb|AE004091.2|:2729570-2729840	17.3097	86.6959	2.32438	0.1255	0.995483	no
XLOC_000986	PA2440	gi|110227054|gb|AE004091.2|:2737881-2750120	10.1468	14.8354	0.548017	0.8262	0.995483	no
XLOC_000986	PA2441	gi|110227054|gb|AE004091.2|:2737881-2750120	15.8662	17.188	0.115441	0.8324	0.995483	no
XLOC_000987	PA2448	gi|110227054|gb|AE004091.2|:2737881-2750120	5.39198	12.2736	1.18668	0.6691	0.995483	no
XLOC_000988	PA2453	gi|110227054|gb|AE004091.2|:2754601-2754823	862.696	276.413	-1.64202	0.027	0.995483	no
XLOC_000989	PA2455	gi|110227054|gb|AE004091.2|:2754876-2757898	56.603	54.2329	-0.0617107	0.401	0.995483	no
XLOC_000094	pcaD	gi|110227054|gb|AE004091.2|:251776-266310	0	0	0	1	1	no
XLOC_000989	PA2454	gi|110227054|gb|AE004091.2|:2754876-2757898	16.4532	24.8272	0.593557	0.60415	0.995483	no
XLOC_000990	PA2457	gi|110227054|gb|AE004091.2|:2754876-2757898	33.5484	60.5005	0.850704	0.5501	0.995483	no
XLOC_000991	PA2458	gi|110227054|gb|AE004091.2|:2758060-2785226	26.4636	46.152	0.802383	0.721	0.995483	no
XLOC_000992	gtdA	gi|110227054|gb|AE004091.2|:2788010-2789072	4.14329	7.83375	0.918927	0.3469	0.995483	no
XLOC_000993	PA2471	gi|110227054|gb|AE004091.2|:2789084-2789783	7.17686	10.7971	0.589226	0.5278	0.995483	no
XLOC_000994	PA2472	gi|110227054|gb|AE004091.2|:2789860-2791207	3.62939	6.4819	0.836692	0.35425	0.995483	no
XLOC_000995	PA2473	gi|110227054|gb|AE004091.2|:2791219-2791864	4.02704	3.02452	-0.413014	1	1	no
XLOC_000996	PA2474	gi|110227054|gb|AE004091.2|:2791905-2794133	2.51006	8.05528	1.68221	0.3719	0.995483	no
XLOC_000997	PA2480	gi|110227054|gb|AE004091.2|:2797734-2799734	62.9666	86.7341	0.462012	0.44685	0.995483	no
XLOC_000997	PA2479	gi|110227054|gb|AE004091.2|:2797734-2799734	17.2342	15.3125	-0.170565	0.7112	0.995483	no
XLOC_000094	pcaC	gi|110227054|gb|AE004091.2|:251776-266310	0	2.56974	inf	1	1	no
XLOC_000998	PA2486	gi|110227054|gb|AE004091.2|:2803344-2803834	610.292	141.183	-2.11193	0.5739	0.995483	no
XLOC_000998	PA2485	gi|110227054|gb|AE004091.2|:2803344-2803834	1049.56	1032.64	-0.0234479	0.96635	0.995483	no
XLOC_000999	PA2489	gi|110227054|gb|AE004091.2|:2804229-2805836	0.00192701	4.65319	11.2376	0.3069	0.995483	no
XLOC_000999	PA2488	gi|110227054|gb|AE004091.2|:2804229-2805836	23.2341	40.1285	0.788383	0.21245	0.995483	no
XLOC_001000	PA2490	gi|110227054|gb|AE004091.2|:2805916-2815282	89.7509	205.407	1.19449	0.68165	0.995483	no
XLOC_001001	mexF	gi|110227054|gb|AE004091.2|:2805916-2815282	14.1186	16.7946	0.250403	0.90225	0.995483	no
XLOC_001001	oprN	gi|110227054|gb|AE004091.2|:2805916-2815282	0	0	0	1	1	no
XLOC_001001	mexE	gi|110227054|gb|AE004091.2|:2805916-2815282	212.932	235.536	0.145555	0.85345	0.995483	no
XLOC_001001	mexT	gi|110227054|gb|AE004091.2|:2805916-2815282	62.9125	65.2687	0.0530449	0.97235	0.995483	no
XLOC_001002	PA2498	gi|110227054|gb|AE004091.2|:2815340-2821701	0	0	0	1	1	no
XLOC_000013	aroE	gi|110227054|gb|AE004091.2|:26710-27535	76.3005	84.1565	0.141384	0.8167	0.995483	no
XLOC_000094	pcaB	gi|110227054|gb|AE004091.2|:251776-266310	14.5453	27.5646	0.922264	0.5044	0.995483	no
XLOC_001002	PA2500	gi|110227054|gb|AE004091.2|:2815340-2821701	0	0	0	1	1	no
XLOC_001002	PA2499	gi|110227054|gb|AE004091.2|:2815340-2821701	0	0	0	1	1	no
XLOC_001003	PA2503	gi|110227054|gb|AE004091.2|:2815340-2821701	53.051	43.2744	-0.293866	0.84605	0.995483	no
XLOC_001004	PA2506	gi|110227054|gb|AE004091.2|:2824282-2824501	0	32.9205	inf	0.07125	0.995483	no
XLOC_001005	catR	gi|110227054|gb|AE004091.2|:2824589-2829298	14.1665	20.0471	0.500912	0.7692	0.995483	no
XLOC_001006	antB	gi|110227054|gb|AE004091.2|:2829439-2831322	10.2676	102.177	3.31491	0.0869	0.995483	no
XLOC_001006	antA	gi|110227054|gb|AE004091.2|:2829439-2831322	6.96642	231.354	5.05354	0.0003	0.274837	no
XLOC_001007	antC	gi|110227054|gb|AE004091.2|:2831340-2832363	11.5744	103.365	3.15873	0.0003	0.274837	no
XLOC_001008	PA2523	gi|110227054|gb|AE004091.2|:2843516-2858451	0	21.649	inf	0.223	0.995483	no
XLOC_001008	PA2524	gi|110227054|gb|AE004091.2|:2843516-2858451	21.5223	24.0897	0.162583	0.90715	0.995483	no
XLOC_000094	pcaT	gi|110227054|gb|AE004091.2|:251776-266310	0	0	0	1	1	no
XLOC_001009	PA2530	gi|110227054|gb|AE004091.2|:2843516-2858451	0.0911896	0	#NAME?	1	1	no
XLOC_001009	PA2529	gi|110227054|gb|AE004091.2|:2843516-2858451	26.5009	18.5177	-0.517133	0.66255	0.995483	no
XLOC_001010	PA2531	gi|110227054|gb|AE004091.2|:2858502-2859627	4.50347	3.28592	-0.454741	0.6727	0.995483	no
XLOC_001011	PA2535	gi|110227054|gb|AE004091.2|:2862943-2863939	14.2127	8.90474	-0.674535	0.39145	0.995483	no
XLOC_001012	xthA	gi|110227054|gb|AE004091.2|:2876554-2877367	100.17	56.647	-0.822379	0.18325	0.995483	no
XLOC_001013	PA2547	gi|110227054|gb|AE004091.2|:2877998-2878916	14.934	17.8561	0.257821	0.72635	0.995483	no
XLOC_001014	PA2548	gi|110227054|gb|AE004091.2|:2878975-2880370	4.97601	8.20203	0.720991	0.3835	0.995483	no
XLOC_001015	PA2549	gi|110227054|gb|AE004091.2|:2880519-2881563	36.6773	19.2005	-0.933744	0.1602	0.995483	no
XLOC_001016	PA2551	gi|110227054|gb|AE004091.2|:2883156-2884089	57.6954	50.1752	-0.201482	0.7416	0.995483	no
XLOC_001017	PA2558	gi|110227054|gb|AE004091.2|:2892270-2892963	50.8534	33.4661	-0.603644	0.36015	0.995483	no
XLOC_000094	pcaF	gi|110227054|gb|AE004091.2|:251776-266310	0	86.855	inf	0.10565	0.995483	no
XLOC_001018	PA2559a	gi|110227054|gb|AE004091.2|:2894146-2894377	16.7358	59.1931	1.82249	0.3408	0.995483	no
XLOC_001019	PA2561	gi|110227054|gb|AE004091.2|:2894907-2896614	14.5914	17.0542	0.225008	0.7207	0.995483	no
XLOC_001020	PA2563	gi|110227054|gb|AE004091.2|:2897609-2899097	15.2322	18.372	0.270384	0.67855	0.995483	no
XLOC_001021	PA2567	gi|110227054|gb|AE004091.2|:2902217-2903981	107.908	113.307	0.0704325	0.90745	0.995483	no
XLOC_001022	PA2572	gi|110227054|gb|AE004091.2|:2907655-2908999	91.4931	98.0736	0.100203	0.8588	0.995483	no
XLOC_001023	PA2575	gi|110227054|gb|AE004091.2|:2912224-2912827	473.194	228.603	-1.04959	0.07445	0.995483	no
XLOC_001024	PA2577	gi|110227054|gb|AE004091.2|:2913921-2914359	113.661	73.066	-0.637468	0.33935	0.995483	no
XLOC_001025	PA2578	gi|110227054|gb|AE004091.2|:2914373-2914934	34.8074	37.2215	0.096743	0.887	0.995483	no
XLOC_001026	PA2581	gi|110227054|gb|AE004091.2|:2916157-3174904	107.601	85.7797	-0.326986	0.8662	0.995483	no
XLOC_001027	PA2588	gi|110227054|gb|AE004091.2|:2916157-3174904	23.699	36.244	0.612916	0.79545	0.995483	no
XLOC_000094	PA0227	gi|110227054|gb|AE004091.2|:251776-266310	0	37.9392	inf	0.2253	0.995483	no
XLOC_001028	PA2592	gi|110227054|gb|AE004091.2|:2916157-3174904	28.9677	60.8905	1.07177	0.6543	0.995483	no
XLOC_001029	qteE	gi|110227054|gb|AE004091.2|:2916157-3174904	6.41539	14.4168	1.16814	0.65235	0.995483	no
XLOC_001030	PA2603	gi|110227054|gb|AE004091.2|:2916157-3174904	3.85957	9.03971	1.22784	0.5701	0.995483	no
XLOC_001030	PA2602	gi|110227054|gb|AE004091.2|:2916157-3174904	0	10.7694	inf	0.04235	0.995483	no
XLOC_001031	PA2604	gi|110227054|gb|AE004091.2|:2916157-3174904	1147.14	749.278	-0.614465	0.8254	0.995483	no
XLOC_001032	PA2608	gi|110227054|gb|AE004091.2|:2916157-3174904	8.7866	0	#NAME?	0.11085	0.995483	no
XLOC_001032	PA2607	gi|110227054|gb|AE004091.2|:2916157-3174904	3.4454	33.5931	3.28542	0.38915	0.995483	no
XLOC_001032	PA2606	gi|110227054|gb|AE004091.2|:2916157-3174904	17.4231	21.0299	0.271437	0.89345	0.995483	no
XLOC_001032	PA2609	gi|110227054|gb|AE004091.2|:2916157-3174904	55.2813	55.0392	-0.00633227	0.997	0.998154	no
XLOC_001032	PA2610	gi|110227054|gb|AE004091.2|:2916157-3174904	0	0	0	1	1	no
XLOC_000094	PA0234	gi|110227054|gb|AE004091.2|:251776-266310	2.24916	0	#NAME?	1	1	no
XLOC_001032	PA2605	gi|110227054|gb|AE004091.2|:2916157-3174904	127.215	114.401	-0.153174	0.9502	0.995483	no
XLOC_001033	PA2618	gi|110227054|gb|AE004091.2|:2916157-3174904	60.2502	157.145	1.38306	0.57045	0.995483	no
XLOC_001033	trxB1	gi|110227054|gb|AE004091.2|:2916157-3174904	359.36	205.596	-0.805622	0.6717	0.995483	no
XLOC_001033	aat	gi|110227054|gb|AE004091.2|:2916157-3174904	0	0	0	1	1	no
XLOC_001034	infA	gi|110227054|gb|AE004091.2|:2916157-3174904	4425.75	1964.3	-1.17191	0.62835	0.995483	no
XLOC_001035	cspD	gi|110227054|gb|AE004091.2|:2916157-3174904	1356.17	593.443	-1.19236	0.62865	0.995483	no
XLOC_001036	PA2630	gi|110227054|gb|AE004091.2|:2916157-3174904	27.6563	35.4582	0.358511	0.8808	0.995483	no
XLOC_001036	idh	gi|110227054|gb|AE004091.2|:2916157-3174904	143.93	81.5766	-0.81914	0.72615	0.995483	no
XLOC_001036	PA2631	gi|110227054|gb|AE004091.2|:2916157-3174904	315.374	415.18	0.396672	0.86665	0.995483	no
XLOC_001036	purB	gi|110227054|gb|AE004091.2|:2916157-3174904	5.61574	0	#NAME?	0.0437	0.995483	no
XLOC_000094	PA0226	gi|110227054|gb|AE004091.2|:251776-266310	0	50.2274	inf	0.23035	0.995483	no
XLOC_001036	PA2628	gi|110227054|gb|AE004091.2|:2916157-3174904	0	0	0	1	1	no
XLOC_001036	trmU	gi|110227054|gb|AE004091.2|:2916157-3174904	0	0	0	1	1	no
XLOC_001036	trmU	gi|110227054|gb|AE004091.2|:2916157-3174904	34.8165	0	#NAME?	0.01235	0.995483	no
XLOC_001036	PA2632	gi|110227054|gb|AE004091.2|:2916157-3174904	0	0	0	1	1	no
XLOC_001036	PA2633	gi|110227054|gb|AE004091.2|:2916157-3174904	0	0	0	1	1	no
XLOC_001036	PA2625	gi|110227054|gb|AE004091.2|:2916157-3174904	0	0	0	1	1	no
XLOC_001037	aceA	gi|110227054|gb|AE004091.2|:2916157-3174904	134.976	104.873	-0.364058	0.88555	0.995483	no
XLOC_001038	PA2636	gi|110227054|gb|AE004091.2|:2916157-3174904	0	0	0	1	1	no
XLOC_001038	PA2635	gi|110227054|gb|AE004091.2|:2916157-3174904	11.8589	27.1477	1.19486	0.6095	0.995483	no
XLOC_001039	nuoF	gi|110227054|gb|AE004091.2|:2916157-3174904	0	9.98553	inf	0.01965	0.995483	no
XLOC_000094	PA0225	gi|110227054|gb|AE004091.2|:251776-266310	32.2292	43.3497	0.427657	0.61955	0.995483	no
XLOC_001039	nuoE	gi|110227054|gb|AE004091.2|:2916157-3174904	26.961	0	#NAME?	0.0255	0.995483	no
XLOC_001039	nuoD	gi|110227054|gb|AE004091.2|:2916157-3174904	0	0	0	1	1	no
XLOC_001039	nuoB	gi|110227054|gb|AE004091.2|:2916157-3174904	341.496	164.801	-1.05114	0.67035	0.995483	no
XLOC_001039	nuoA	gi|110227054|gb|AE004091.2|:2916157-3174904	847.475	594.037	-0.512618	0.79515	0.995483	no
XLOC_001040	nuoM	gi|110227054|gb|AE004091.2|:2916157-3174904	0	0	0	1	1	no
XLOC_001040	nuoN	gi|110227054|gb|AE004091.2|:2916157-3174904	10.363	7.01976	-0.561945	0.8156	0.995483	no
XLOC_001040	nuoL	gi|110227054|gb|AE004091.2|:2916157-3174904	54.2485	35.4327	-0.6145	0.79875	0.995483	no
XLOC_001040	nuoK	gi|110227054|gb|AE004091.2|:2916157-3174904	56.926	66.7794	0.230317	0.9154	0.995483	no
XLOC_001040	nuoJ	gi|110227054|gb|AE004091.2|:2916157-3174904	62.9167	27.304	-1.20433	0.62555	0.995483	no
XLOC_001040	nuoI	gi|110227054|gb|AE004091.2|:2916157-3174904	0	0	0	1	1	no
XLOC_000095	PA0236	gi|110227054|gb|AE004091.2|:266615-267395	33.9295	29.6357	-0.195203	0.7656	0.995483	no
XLOC_001040	nuoH	gi|110227054|gb|AE004091.2|:2916157-3174904	37.3115	43.2874	0.214326	0.9299	0.995483	no
XLOC_001040	nuoG	gi|110227054|gb|AE004091.2|:2916157-3174904	118.417	100.313	-0.239372	0.89465	0.995483	no
XLOC_001041	PA2650	gi|110227054|gb|AE004091.2|:2916157-3174904	16.615	14.9238	-0.154874	0.9444	0.995483	no
XLOC_001042	PA2654	gi|110227054|gb|AE004091.2|:2916157-3174904	48.5598	53.4022	0.137135	0.95205	0.995483	no
XLOC_001043	PA2661	gi|110227054|gb|AE004091.2|:2916157-3174904	0	0	0	1	1	no
XLOC_001043	PA2660	gi|110227054|gb|AE004091.2|:2916157-3174904	22.8893	19.201	-0.253498	0.8899	0.995483	no
XLOC_001044	PA2667	gi|110227054|gb|AE004091.2|:2916157-3174904	2359.89	1547.45	-0.608829	0.82025	0.995483	no
XLOC_001044	PA2666	gi|110227054|gb|AE004091.2|:2916157-3174904	0	0	0	1	1	no
XLOC_001044	PA2665	gi|110227054|gb|AE004091.2|:2916157-3174904	315.038	257.852	-0.288981	0.85915	0.995483	no
XLOC_001045	PA2681	gi|110227054|gb|AE004091.2|:2916157-3174904	6.94704	5.8109	-0.257637	0.90845	0.995483	no
XLOC_000096	PA0237	gi|110227054|gb|AE004091.2|:267637-268681	4.23199	6.00015	0.503661	0.622	0.995483	no
XLOC_001045	PA2680	gi|110227054|gb|AE004091.2|:2916157-3174904	14.2727	15.7543	0.14248	0.95155	0.995483	no
XLOC_001046	PA2682	gi|110227054|gb|AE004091.2|:2916157-3174904	6.8509	71.6562	3.38673	0.2152	0.995483	no
XLOC_001047	PA2689	gi|110227054|gb|AE004091.2|:2916157-3174904	0	0	0	1	1	no
XLOC_001047	pfeA	gi|110227054|gb|AE004091.2|:2916157-3174904	0	5.06762	inf	0.02875	0.995483	no
XLOC_001047	pfeS	gi|110227054|gb|AE004091.2|:2916157-3174904	15.5632	12.8032	-0.281643	0.87705	0.995483	no
XLOC_001047	pfeR	gi|110227054|gb|AE004091.2|:2916157-3174904	9.3882	4.23858	-1.14727	0.6585	0.995483	no
XLOC_001048	PA2692	gi|110227054|gb|AE004091.2|:2916157-3174904	116.105	96.0368	-0.27377	0.908	0.995483	no
XLOC_001049	PA2693	gi|110227054|gb|AE004091.2|:2916157-3174904	13.9409	26.742	0.939789	0.71225	0.995483	no
XLOC_001050	PA2701	gi|110227054|gb|AE004091.2|:2916157-3174904	14.0656	7.73141	-0.863363	0.72275	0.995483	no
XLOC_001050	opdB	gi|110227054|gb|AE004091.2|:2916157-3174904	12.1001	18.1973	0.588705	0.80465	0.995483	no
XLOC_000097	PA0238	gi|110227054|gb|AE004091.2|:268703-269519	15.4842	37.7641	1.28622	0.0836	0.995483	no
XLOC_001050	PA2699	gi|110227054|gb|AE004091.2|:2916157-3174904	3.62655	6.60424	0.864794	0.61635	0.995483	no
XLOC_001051	PA2703	gi|110227054|gb|AE004091.2|:2916157-3174904	15.7212	9.33643	-0.751771	0.6629	0.995483	no
XLOC_001051	PA2702	gi|110227054|gb|AE004091.2|:2916157-3174904	28.159	67.8272	1.26827	0.5736	0.995483	no
XLOC_001052	PA2710	gi|110227054|gb|AE004091.2|:2916157-3174904	0	0	0	1	1	no
XLOC_001052	cysK	gi|110227054|gb|AE004091.2|:2916157-3174904	117.477	89.3401	-0.394995	0.81365	0.995483	no
XLOC_001053	PA2711	gi|110227054|gb|AE004091.2|:2916157-3174904	10.0088	27.6363	1.46529	0.55425	0.995483	no
XLOC_001054	PA2712	gi|110227054|gb|AE004091.2|:2916157-3174904	20.642	23.3665	0.178861	0.93835	0.995483	no
XLOC_001055	PA2715	gi|110227054|gb|AE004091.2|:2916157-3174904	24.3817	5.50642	-2.14661	0.5023	0.995483	no
XLOC_001055	PA2714	gi|110227054|gb|AE004091.2|:2916157-3174904	8.72661	9.42917	0.111709	0.9529	0.995483	no
XLOC_001056	PA2719	gi|110227054|gb|AE004091.2|:2916157-3174904	0	0	0	1	1	no
XLOC_000014	plcB	gi|110227054|gb|AE004091.2|:27645-30498	38.3031	32.639	-0.230865	0.8003	0.995483	no
XLOC_000098	PA0239	gi|110227054|gb|AE004091.2|:269668-270547	20.1835	14.9029	-0.43759	0.5504	0.995483	no
XLOC_001056	PA2718	gi|110227054|gb|AE004091.2|:2916157-3174904	158.938	142.283	-0.159701	0.92185	0.995483	no
XLOC_001057	PA2729	gi|110227054|gb|AE004091.2|:2916157-3174904	0	0	0	1	1	no
XLOC_001057	PA2726	gi|110227054|gb|AE004091.2|:2916157-3174904	5.76794	26.0849	2.17709	0.4434	0.995483	no
XLOC_001057	PA2725	gi|110227054|gb|AE004091.2|:2916157-3174904	27.636	15.5833	-0.826548	0.72655	0.995483	no
XLOC_001057	PA2724	gi|110227054|gb|AE004091.2|:2916157-3174904	0	0	0	1	1	no
XLOC_001057	PA2723	gi|110227054|gb|AE004091.2|:2916157-3174904	201.132	236.613	0.234386	0.9255	0.995483	no
XLOC_001057	PA2722	gi|110227054|gb|AE004091.2|:2916157-3174904	4.0082	0	#NAME?	1	1	no
XLOC_001057	PA2721	gi|110227054|gb|AE004091.2|:2916157-3174904	17.439	22.3394	0.357271	0.8882	0.995483	no
XLOC_001058	PA2746	gi|110227054|gb|AE004091.2|:2916157-3174904	191.336	254.596	0.412097	0.81725	0.995483	no
XLOC_001058	PA2746a	gi|110227054|gb|AE004091.2|:2916157-3174904	2545.43	2823.78	0.149722	0.95125	0.995483	no
XLOC_000099	PA0242	gi|110227054|gb|AE004091.2|:273774-275679	7.66652	10.7129	0.482699	0.47585	0.995483	no
XLOC_001059	PA2750	gi|110227054|gb|AE004091.2|:2916157-3174904	1.83974	11.0638	2.58827	0.43605	0.995483	no
XLOC_001059	endA	gi|110227054|gb|AE004091.2|:2916157-3174904	25.4538	22.8053	-0.158511	0.94205	0.995483	no
XLOC_001060	PA2751	gi|110227054|gb|AE004091.2|:2916157-3174904	17.0222	22.6522	0.41223	0.8612	0.995483	no
XLOC_001061	PA2753	gi|110227054|gb|AE004091.2|:2916157-3174904	938.933	1823.94	0.957966	0.7202	0.995483	no
XLOC_001062	PA2754	gi|110227054|gb|AE004091.2|:2916157-3174904	1280.97	1846.87	0.52784	0.8333	0.995483	no
XLOC_001063	PA2755a	gi|110227054|gb|AE004091.2|:2916157-3174904	953.949	549.68	-0.795321	0.73945	0.995483	no
XLOC_001064	eco	gi|110227054|gb|AE004091.2|:2916157-3174904	826.028	464.738	-0.829773	0.74975	0.995483	no
XLOC_001065	PA2758	gi|110227054|gb|AE004091.2|:2916157-3174904	60.6211	107.866	0.831351	0.72875	0.995483	no
XLOC_001066	PA2760	gi|110227054|gb|AE004091.2|:2916157-3174904	498.8	350.422	-0.509369	0.8489	0.995483	no
XLOC_001067	PA2761	gi|110227054|gb|AE004091.2|:2916157-3174904	119.279	87.7359	-0.4431	0.85365	0.995483	no
XLOC_000100	PA0243	gi|110227054|gb|AE004091.2|:275771-305598	91.6712	59.569	-0.621908	0.82285	0.995483	no
XLOC_001068	PA2763a	gi|110227054|gb|AE004091.2|:2916157-3174904	56.9085	26.2163	-1.11818	0.56905	0.995483	no
XLOC_001069	PA2764	gi|110227054|gb|AE004091.2|:2916157-3174904	34.8997	40.0561	0.198806	0.93215	0.995483	no
XLOC_001070	PA2768	gi|110227054|gb|AE004091.2|:2916157-3174904	0	0	0	1	1	no
XLOC_001070	PA2767	gi|110227054|gb|AE004091.2|:2916157-3174904	10.8735	13.1837	0.27794	0.8684	0.995483	no
XLOC_001071	PA2771	gi|110227054|gb|AE004091.2|:2916157-3174904	31.7138	29.836	-0.088055	0.9667	0.995483	no
XLOC_001072	PA2772a	gi|110227054|gb|AE004091.2|:2916157-3174904	0	0	0	1	1	no
XLOC_001073	PA2776	gi|110227054|gb|AE004091.2|:2916157-3174904	89.988	51.4325	-0.807054	0.7433	0.995483	no
XLOC_001074	PA2781	gi|110227054|gb|AE004091.2|:2916157-3174904	0	21.2001	inf	0.0571	0.995483	no
XLOC_001074	PA2780	gi|110227054|gb|AE004091.2|:2916157-3174904	37.0814	64.7704	0.80464	0.7407	0.995483	no
XLOC_001075	PA2783	gi|110227054|gb|AE004091.2|:2916157-3174904	0.324268	1.63722	2.33599	1	1	no
XLOC_000101	PA0248	gi|110227054|gb|AE004091.2|:275771-305598	70.5808	52.0827	-0.43847	0.8619	0.995483	no
XLOC_001075	PA2782	gi|110227054|gb|AE004091.2|:2916157-3174904	10.2977	20.5725	0.998399	0.5877	0.995483	no
XLOC_001076	PA2785	gi|110227054|gb|AE004091.2|:2916157-3174904	0	0	0	1	1	no
XLOC_001076	PA2784	gi|110227054|gb|AE004091.2|:2916157-3174904	2.03901	11.2194	2.46005	0.3547	0.995483	no
XLOC_001077	cpg2	gi|110227054|gb|AE004091.2|:2916157-3174904	25.2305	28.8897	0.195387	0.93375	0.995483	no
XLOC_001077	PA2786	gi|110227054|gb|AE004091.2|:2916157-3174904	1.10818	8.67162	2.96811	0.2949	0.995483	no
XLOC_001078	PA2789	gi|110227054|gb|AE004091.2|:2916157-3174904	14.8804	19.5703	0.395248	0.86865	0.995483	no
XLOC_001079	PA2790	gi|110227054|gb|AE004091.2|:2916157-3174904	29.3599	31.6448	0.108122	0.95815	0.995483	no
XLOC_001080	tal	gi|110227054|gb|AE004091.2|:2916157-3174904	114.175	86.3347	-0.403232	0.866	0.995483	no
XLOC_001080	PA2795	gi|110227054|gb|AE004091.2|:2916157-3174904	54.8037	47.2595	-0.213669	0.9275	0.995483	no
XLOC_001081	PA2799	gi|110227054|gb|AE004091.2|:2916157-3174904	134.448	160.706	0.257376	0.9148	0.995483	no
XLOC_000102	PA0267	gi|110227054|gb|AE004091.2|:275771-305598	0	0	0	1	1	no
XLOC_001082	PA2801	gi|110227054|gb|AE004091.2|:2916157-3174904	117.555	97.6769	-0.26725	0.9097	0.995483	no
XLOC_001083	PA2804	gi|110227054|gb|AE004091.2|:2916157-3174904	0	0	0	1	1	no
XLOC_001083	PA2805	gi|110227054|gb|AE004091.2|:2916157-3174904	4038.47	2915.56	-0.470039	0.85565	0.995483	no
XLOC_001083	PA2803	gi|110227054|gb|AE004091.2|:2916157-3174904	160	162.421	0.0216645	0.9885	0.996	no
XLOC_001084	copS	gi|110227054|gb|AE004091.2|:2916157-3174904	15.8147	25.3773	0.682269	0.75775	0.995483	no
XLOC_001084	copR	gi|110227054|gb|AE004091.2|:2916157-3174904	20.789	26.0582	0.325916	0.88645	0.995483	no
XLOC_001085	PA2815	gi|110227054|gb|AE004091.2|:2916157-3174904	99.0689	86.8586	-0.189764	0.93775	0.995483	no
XLOC_001086	PA2817	gi|110227054|gb|AE004091.2|:2916157-3174904	151.171	101.807	-0.57035	0.8127	0.995483	no
XLOC_001086	PA2816	gi|110227054|gb|AE004091.2|:2916157-3174904	97.2776	110.748	0.187105	0.91815	0.995483	no
XLOC_001087	PA2820	gi|110227054|gb|AE004091.2|:2916157-3174904	185.977	164.986	-0.172774	0.94385	0.995483	no
XLOC_000102	gabT	gi|110227054|gb|AE004091.2|:275771-305598	144.741	84.387	-0.77838	0.6548	0.995483	no
XLOC_001088	PA2821	gi|110227054|gb|AE004091.2|:3174965-3175628	112.212	85.0513	-0.399826	0.51545	0.995483	no
XLOC_001089	PA2824	gi|110227054|gb|AE004091.2|:3177089-3179450	35.1789	37.1108	0.0771266	0.89015	0.995483	no
XLOC_001090	PA2828	gi|110227054|gb|AE004091.2|:3181136-3182348	72.8957	55.4129	-0.395612	0.50115	0.995483	no
XLOC_001091	PA2829	gi|110227054|gb|AE004091.2|:3182399-3182852	18.993	35.7167	0.911127	0.29385	0.995483	no
XLOC_001092	htpX	gi|110227054|gb|AE004091.2|:3182985-3183861	352.583	290.891	-0.277483	0.63505	0.995483	no
XLOC_001093	PA2831	gi|110227054|gb|AE004091.2|:3184001-3185129	47.4537	40.7597	-0.219378	0.72205	0.995483	no
XLOC_001094	PA2834	gi|110227054|gb|AE004091.2|:3186448-3187408	39.181	39.0753	-0.00389751	0.98545	0.995483	no
XLOC_001095	PA2835	gi|110227054|gb|AE004091.2|:3187545-3189138	2.98697	4.12622	0.466142	1	1	no
XLOC_001096	PA2837	gi|110227054|gb|AE004091.2|:3189149-3191650	2.39748	5.997	1.32272	0.2611	0.995483	no
XLOC_001096	PA2836	gi|110227054|gb|AE004091.2|:3189149-3191650	4.12887	9.75836	1.24089	0.23805	0.995483	no
XLOC_000102	gabD	gi|110227054|gb|AE004091.2|:275771-305598	220.362	143.524	-0.618584	0.6967	0.995483	no
XLOC_001097	PA2838	gi|110227054|gb|AE004091.2|:3191686-3192658	4.62833	10.0548	1.11931	0.2475	0.995483	no
XLOC_001098	PA2839	gi|110227054|gb|AE004091.2|:3192748-3193519	16.7114	14.1648	-0.238522	0.76715	0.995483	no
XLOC_001099	PA2841	gi|110227054|gb|AE004091.2|:3195899-3196691	18.1298	30.1769	0.735083	0.31245	0.995483	no
XLOC_001100	PA2843	gi|110227054|gb|AE004091.2|:3197641-3198988	42.5157	50.6767	0.253329	0.6685	0.995483	no
XLOC_001101	PA2846	gi|110227054|gb|AE004091.2|:3200649-3201504	24.5661	45.824	0.89943	0.1684	0.995483	no
XLOC_001102	PA2848	gi|110227054|gb|AE004091.2|:3202292-3203312	5.0824	6.99843	0.461522	0.61715	0.995483	no
XLOC_001103	ohrR	gi|110227054|gb|AE004091.2|:3203397-3203853	82.1085	73.2216	-0.165262	0.8032	0.995483	no
XLOC_001104	ohr	gi|110227054|gb|AE004091.2|:3203997-3204426	73.5416	55.4642	-0.407004	0.5562	0.995483	no
XLOC_001106	oprI	gi|110227054|gb|AE004091.2|:3206914-3207166	268673	220014	-0.288259	0.6902	0.995483	no
XLOC_001107	PA2857	gi|110227054|gb|AE004091.2|:3209288-3209972	39.4707	43.1271	0.127813	0.84505	0.995483	no
XLOC_000103	PA0269	gi|110227054|gb|AE004091.2|:305724-306162	27.7839	29.5074	0.0868307	0.92995	0.995483	no
XLOC_001108	PA2858	gi|110227054|gb|AE004091.2|:3209980-3212473	19.4244	23.761	0.290727	0.6324	0.995483	no
XLOC_001109	greB	gi|110227054|gb|AE004091.2|:3212524-3213031	91.7497	58.9972	-0.637057	0.32995	0.995483	no
XLOC_001110	ligT	gi|110227054|gb|AE004091.2|:3213537-3214086	8.57507	9.62245	0.166255	0.89675	0.995483	no
XLOC_001111	lipA	gi|110227054|gb|AE004091.2|:3214281-3215217	19.4228	27.0488	0.477812	0.48255	0.995483	no
XLOC_001112	lipH	gi|110227054|gb|AE004091.2|:3215422-3230224	5.36045	8.09051	0.593875	0.80395	0.995483	no
XLOC_001113	PA2868	gi|110227054|gb|AE004091.2|:3215422-3230224	42.0032	77.938	0.891827	0.75005	0.995483	no
XLOC_001113	PA2870	gi|110227054|gb|AE004091.2|:3215422-3230224	0	0	0	1	1	no
XLOC_001113	PA2869	gi|110227054|gb|AE004091.2|:3215422-3230224	0.358431	0.502572	0.487635	1	1	no
XLOC_001113	PA2867	gi|110227054|gb|AE004091.2|:3215422-3230224	148.059	137.782	-0.103784	0.95875	0.995483	no
XLOC_001113	mttC	gi|110227054|gb|AE004091.2|:3215422-3230224	68.9815	80.7565	0.227368	0.8507	0.995483	no
XLOC_000104	PA0270	gi|110227054|gb|AE004091.2|:306173-306581	20.2707	33.6993	0.733326	0.4304	0.995483	no
XLOC_001114	PA2878	gi|110227054|gb|AE004091.2|:3231217-3231859	12.1637	30.449	1.32381	0.1069	0.995483	no
XLOC_001115	PA2880	gi|110227054|gb|AE004091.2|:3232818-3233334	3.7919	19.1112	2.33342	0.1245	0.995483	no
XLOC_001116	PA2884	gi|110227054|gb|AE004091.2|:3235391-3237555	0	0	0	1	1	no
XLOC_001116	PA2883	gi|110227054|gb|AE004091.2|:3235391-3237555	7466.47	14161.6	0.923485	0.40855	0.995483	no
XLOC_001117	atuA	gi|110227054|gb|AE004091.2|:3237835-3239638	25.5781	24.6852	-0.0512598	0.9313	0.995483	no
XLOC_001118	atuB	gi|110227054|gb|AE004091.2|:3239710-3240589	23.6937	15.3996	-0.62161	0.38525	0.995483	no
XLOC_001119	atuC	gi|110227054|gb|AE004091.2|:3240590-3242207	16.3592	17.6577	0.110197	0.86605	0.995483	no
XLOC_001120	atuD	gi|110227054|gb|AE004091.2|:3242323-3243484	24.1477	25.3058	0.0675845	0.91625	0.995483	no
XLOC_001121	atuE	gi|110227054|gb|AE004091.2|:3243504-3244299	11.0232	11.8969	0.110052	0.897	0.995483	no
XLOC_001122	atuF	gi|110227054|gb|AE004091.2|:3244344-3246330	12.6405	12.6901	0.00565024	0.98285	0.995483	no
XLOC_000105	PA0271	gi|110227054|gb|AE004091.2|:306614-307828	21.5631	42.0864	0.964788	0.64335	0.995483	no
XLOC_001123	atuG	gi|110227054|gb|AE004091.2|:3246381-3247206	8.5838	14.0261	0.708424	0.41055	0.995483	no
XLOC_001124	atuH	gi|110227054|gb|AE004091.2|:3247368-3249195	14.2435	22.6588	0.669767	0.2992	0.995483	no
XLOC_001125	cbiD	gi|110227054|gb|AE004091.2|:3253289-3264587	18.0463	19.7405	0.129454	0.885	0.995483	no
XLOC_001125	cbiD	gi|110227054|gb|AE004091.2|:3253289-3264587	27.0826	25.8609	-0.0665937	0.6105	0.995483	no
XLOC_001125	cobL	gi|110227054|gb|AE004091.2|:3253289-3264587	24.975	19.9878	-0.321366	0.60355	0.995483	no
XLOC_001126	PA2911	gi|110227054|gb|AE004091.2|:3265847-3268004	7.89182	11.5831	0.553589	0.41125	0.995483	no
XLOC_001127	PA2913	gi|110227054|gb|AE004091.2|:3268056-3278578	1.63849	4.88297	1.5754	0.6251	0.995483	no
XLOC_001127	PA2914	gi|110227054|gb|AE004091.2|:3268056-3278578	6.47967	8.12086	0.325713	0.88255	0.995483	no
XLOC_001127	PA2912	gi|110227054|gb|AE004091.2|:3268056-3278578	0	1.39878	inf	1	1	no
XLOC_001128	PA2919	gi|110227054|gb|AE004091.2|:3268056-3278578	22.4237	44.4602	0.987487	0.74935	0.995483	no
XLOC_000014	PA0028	gi|110227054|gb|AE004091.2|:27645-30498	20.7671	30.0354	0.532362	0.78745	0.995483	no
XLOC_000106	PA0276	gi|110227054|gb|AE004091.2|:310895-311411	24.6474	62.6422	1.3457	0.0815	0.995483	no
XLOC_001128	PA2918	gi|110227054|gb|AE004091.2|:3268056-3278578	42.8638	36.3121	-0.239309	0.82975	0.995483	no
XLOC_001129	PA2922	gi|110227054|gb|AE004091.2|:3268056-3278578	3.06704	4.17863	0.446184	1	1	no
XLOC_001130	hisJ	gi|110227054|gb|AE004091.2|:3278637-3279423	2.03516	4.02622	0.984284	1	1	no
XLOC_001131	hisM	gi|110227054|gb|AE004091.2|:3279478-3280878	4.64407	9.82874	1.08162	0.3652	0.995483	no
XLOC_001131	hisQ	gi|110227054|gb|AE004091.2|:3279478-3280878	6.09129	6.18423	0.0218463	0.9188	0.995483	no
XLOC_001132	hisP	gi|110227054|gb|AE004091.2|:3280898-3281666	9.4501	7.11961	-0.408532	0.6724	0.995483	no
XLOC_001133	PA2927	gi|110227054|gb|AE004091.2|:3281987-3283319	7.8806	9.55281	0.277619	0.72085	0.995483	no
XLOC_001134	PA2930	gi|110227054|gb|AE004091.2|:3285006-3287297	72.9683	109.28	0.582685	0.49035	0.995483	no
XLOC_001135	morB	gi|110227054|gb|AE004091.2|:3287339-3288449	7.84794	10.3908	0.404917	0.61085	0.995483	no
XLOC_001136	PA2933	gi|110227054|gb|AE004091.2|:3288514-3289693	2.431	6.55554	1.43117	0.2025	0.995483	no
XLOC_000107	PA0279	gi|110227054|gb|AE004091.2|:313226-313925	40.6689	42.5138	0.0640055	0.9246	0.995483	no
XLOC_001137	cif	gi|110227054|gb|AE004091.2|:3289714-3290674	6.26896	9.76883	0.639959	0.475	0.995483	no
XLOC_001138	PA2936	gi|110227054|gb|AE004091.2|:3291282-3291864	3.13121	3.51922	0.168535	1	1	no
XLOC_001139	PA2937	gi|110227054|gb|AE004091.2|:3291959-3292268	223.904	461.789	1.04436	0.10305	0.995483	no
XLOC_001140	PA2939	gi|110227054|gb|AE004091.2|:3292323-3297118	0.0270735	0.0102622	-1.39954	1	1	no
XLOC_001142	PA2943	gi|110227054|gb|AE004091.2|:3299491-3300586	5.98496	20.374	1.76732	0.039	0.995483	no
XLOC_001143	PA2946	gi|110227054|gb|AE004091.2|:3306311-3307013	59.4474	77.8144	0.388424	0.52405	0.995483	no
XLOC_001144	cobM	gi|110227054|gb|AE004091.2|:3307084-3308262	18.3372	13.4046	-0.45204	0.57995	0.995483	no
XLOC_001144	PA2947	gi|110227054|gb|AE004091.2|:3307084-3308262	7.87945	10.2171	0.374816	0.8449	0.995483	no
XLOC_001145	PA2949	gi|110227054|gb|AE004091.2|:3308390-3309338	33.4423	38.7973	0.21428	0.7357	0.995483	no
XLOC_001146	PA2953	gi|110227054|gb|AE004091.2|:3312790-3314446	346.158	165.587	-1.06384	0.0761	0.995483	no
XLOC_000108	desA	gi|110227054|gb|AE004091.2|:320765-321944	261.332	152.848	-0.773792	0.18635	0.995483	no
XLOC_001147	PA2958	gi|110227054|gb|AE004091.2|:3317523-3318657	50.9706	60.0249	0.235896	0.70285	0.995483	no
XLOC_001149	PA2972	gi|110227054|gb|AE004091.2|:3329044-3329623	15.781	14.1874	-0.153584	0.85915	0.995483	no
XLOC_001150	rne	gi|110227054|gb|AE004091.2|:3332880-3336054	101.808	62.3764	-0.706773	0.2197	0.995483	no
XLOC_001151	PA2985	gi|110227054|gb|AE004091.2|:3343177-3343711	164.936	114.576	-0.525602	0.3914	0.995483	no
XLOC_001152	PA2989	gi|110227054|gb|AE004091.2|:3347141-3347741	70.2454	61.3583	-0.195144	0.75605	0.995483	no
XLOC_001153	PA2990	gi|110227054|gb|AE004091.2|:3348072-3348795	133.487	85.0135	-0.650935	0.2754	0.995483	no
XLOC_001154	mfd	gi|110227054|gb|AE004091.2|:3360874-3364321	42.5976	32.7391	-0.379757	0.4958	0.995483	no
XLOC_001155	PA3003	gi|110227054|gb|AE004091.2|:3364331-3364961	76.4239	55.5442	-0.460386	0.47005	0.995483	no
XLOC_001156	PA3008	gi|110227054|gb|AE004091.2|:3366969-3369993	26.2643	111.352	2.08396	0.5525	0.995483	no
XLOC_001156	lexA	gi|110227054|gb|AE004091.2|:3366969-3369993	79.7391	135.809	0.768224	0.6898	0.995483	no
XLOC_000109	gpuP	gi|110227054|gb|AE004091.2|:322174-323560	7.01943	9.97393	0.506808	0.5007	0.995483	no
XLOC_001157	PA3015	gi|110227054|gb|AE004091.2|:3377034-3377853	78.97	72.4408	-0.124503	0.83985	0.995483	no
XLOC_001158	PA3017	gi|110227054|gb|AE004091.2|:3378511-3378949	484.955	1039.79	1.10036	0.0576	0.995483	no
XLOC_001159	PA3020	gi|110227054|gb|AE004091.2|:3381962-3383891	63.2283	44.4097	-0.509695	0.3702	0.995483	no
XLOC_001160	PA3021	gi|110227054|gb|AE004091.2|:3383947-3384334	106.479	76.6227	-0.474726	0.48185	0.995483	no
XLOC_001161	PA3027	gi|110227054|gb|AE004091.2|:3391207-3392239	27.1907	23.5339	-0.208371	0.7551	0.995483	no
XLOC_001162	mobA	gi|110227054|gb|AE004091.2|:3394087-3400515	57.2268	31.3326	-0.869027	0.76925	0.995483	no
XLOC_001163	PA3031	gi|110227054|gb|AE004091.2|:3394087-3400515	6634.54	4289.53	-0.629179	0.7699	0.995483	no
XLOC_001165	PA3036	gi|110227054|gb|AE004091.2|:3394087-3400515	7.18312	10.5005	0.547779	0.8347	0.995483	no
XLOC_001165	PA3035	gi|110227054|gb|AE004091.2|:3394087-3400515	31.5129	15.1504	-1.05659	0.5979	0.995483	no
XLOC_001165	PA3037	gi|110227054|gb|AE004091.2|:3394087-3400515	1.55076	0	#NAME?	1	1	no
XLOC_000110	gpuA	gi|110227054|gb|AE004091.2|:323615-324572	8.65413	8.47001	-0.0310251	0.95325	0.995483	no
XLOC_001166	PA3038	gi|110227054|gb|AE004091.2|:3400683-3406310	230.454	209.189	-0.13967	0.91485	0.995483	no
XLOC_001167	PA3042	gi|110227054|gb|AE004091.2|:3400683-3406310	14.4559	31.3112	1.11502	0.6847	0.995483	no
XLOC_001167	PA3041	gi|110227054|gb|AE004091.2|:3400683-3406310	0	0	0	1	1	no
XLOC_001167	PA3040	gi|110227054|gb|AE004091.2|:3400683-3406310	1614.11	962.454	-0.745949	0.55995	0.995483	no
XLOC_001168	PA3043	gi|110227054|gb|AE004091.2|:3400683-3406310	77.7553	58.5109	-0.410234	0.39835	0.995483	no
XLOC_001169	PA3047	gi|110227054|gb|AE004091.2|:3410263-3411694	63.2745	57.6616	-0.134014	0.81325	0.995483	no
XLOC_001170	rmf	gi|110227054|gb|AE004091.2|:3414400-3414613	29066.1	15205.1	-0.934782	0.12835	0.995483	no
XLOC_001171	PA3052	gi|110227054|gb|AE004091.2|:3415785-3417041	36.5982	46.6718	0.350778	0.63305	0.995483	no
XLOC_001172	PA3053	gi|110227054|gb|AE004091.2|:3417112-3418120	30.9491	35.5098	0.19832	0.76025	0.995483	no
XLOC_001173	PA3054	gi|110227054|gb|AE004091.2|:3418287-3420192	25.4389	26.7821	0.0742346	0.90165	0.995483	no
XLOC_000111	gpuR	gi|110227054|gb|AE004091.2|:324624-325587	64.0032	72.0947	0.171751	0.7807	0.995483	no
XLOC_001174	PA3057	gi|110227054|gb|AE004091.2|:3421424-3421655	33.4717	109.93	1.71557	0.2205	0.995483	no
XLOC_001175	PA3071	gi|110227054|gb|AE004091.2|:3442716-3468050	8.48255	4.83786	-0.81013	0.7663	0.995483	no
XLOC_001175	PA3070	gi|110227054|gb|AE004091.2|:3442716-3468050	88.2943	72.2226	-0.28987	0.8591	0.995483	no
XLOC_001175	PA3072	gi|110227054|gb|AE004091.2|:3442716-3468050	4.32731	0	#NAME?	1	1	no
XLOC_001175	PA3073	gi|110227054|gb|AE004091.2|:3442716-3468050	11.151	0	#NAME?	0.09495	0.995483	no
XLOC_001175	PA3074	gi|110227054|gb|AE004091.2|:3442716-3468050	0.745901	0	#NAME?	1	1	no
XLOC_001175	PA3075	gi|110227054|gb|AE004091.2|:3442716-3468050	0	0	0	1	1	no
XLOC_001175	PA3078	gi|110227054|gb|AE004091.2|:3442716-3468050	0	0	0	1	1	no
XLOC_001175	PA3076	gi|110227054|gb|AE004091.2|:3442716-3468050	11.9865	18.0628	0.591609	0.82145	0.995483	no
XLOC_001175	PA3077	gi|110227054|gb|AE004091.2|:3442716-3468050	0	4.06356	inf	1	1	no
XLOC_000112	PA0290	gi|110227054|gb|AE004091.2|:325699-326671	47.8261	56.3941	0.237746	0.69885	0.995483	no
XLOC_001176	PA3089	gi|110227054|gb|AE004091.2|:3442716-3468050	54.422	85.9123	0.658675	0.7167	0.995483	no
XLOC_001177	PA3094	gi|110227054|gb|AE004091.2|:3470763-3486330	0	0	0	1	1	no
XLOC_001177	PA3093	gi|110227054|gb|AE004091.2|:3470763-3486330	255.442	160.982	-0.666101	0.53275	0.995483	no
XLOC_001178	xcpQ	gi|110227054|gb|AE004091.2|:3470763-3486330	0	0	0	1	1	no
XLOC_001178	xcpP	gi|110227054|gb|AE004091.2|:3470763-3486330	210.609	184.094	-0.194125	0.9108	0.995483	no
XLOC_001179	PA3122	gi|110227054|gb|AE004091.2|:3504878-3505772	30.0471	38.8859	0.37202	0.5681	0.995483	no
XLOC_001180	PA3125	gi|110227054|gb|AE004091.2|:3507344-3508673	13.6961	39.2104	1.51747	0.02535	0.995483	no
XLOC_001181	PA3127	gi|110227054|gb|AE004091.2|:3509323-3510127	35.5354	33.4874	-0.0856373	0.8983	0.995483	no
XLOC_001182	PA3128	gi|110227054|gb|AE004091.2|:3510143-3510890	56.7091	59.1309	0.0603309	0.9189	0.995483	no
XLOC_001183	PA3136	gi|110227054|gb|AE004091.2|:3517927-3518995	6.85757	8.16879	0.252424	0.76575	0.995483	no
XLOC_000113	oprE	gi|110227054|gb|AE004091.2|:327283-328666	313.159	197.983	-0.661517	0.26575	0.995483	no
XLOC_001184	PA3137	gi|110227054|gb|AE004091.2|:3519044-3520544	19.2071	17.4227	-0.140667	0.8295	0.995483	no
XLOC_001185	PA3139	gi|110227054|gb|AE004091.2|:3522747-3524087	137.977	115.562	-0.255757	0.65905	0.995483	no
XLOC_001186	PA3170	gi|110227054|gb|AE004091.2|:3560620-3561955	56.066	34.2399	-0.711446	0.2317	0.995483	no
XLOC_001187	ubiG	gi|110227054|gb|AE004091.2|:3562105-3563481	26.0653	29.3962	0.173498	0.8997	0.995483	no
XLOC_001187	ubiG	gi|110227054|gb|AE004091.2|:3562105-3563481	126.791	140.363	0.146708	0.81435	0.995483	no
XLOC_001188	PA3173	gi|110227054|gb|AE004091.2|:3563545-3564286	104.759	103.997	-0.0105299	0.98835	0.996	no
XLOC_001189	PA3174	gi|110227054|gb|AE004091.2|:3564444-3565173	24.8137	19.1034	-0.377306	0.60285	0.995483	no
XLOC_001190	PA3175	gi|110227054|gb|AE004091.2|:3565188-3566124	16.1857	17.8797	0.143606	0.83375	0.995483	no
XLOC_001191	gltS	gi|110227054|gb|AE004091.2|:3566162-3567377	7.61964	6.65658	-0.19494	0.8115	0.995483	no
XLOC_001192	PA3177	gi|110227054|gb|AE004091.2|:3567605-3568529	39.4924	46.602	0.238818	0.7028	0.995483	no
XLOC_000114	spuA	gi|110227054|gb|AE004091.2|:330995-335486	332.227	193.758	-0.777913	0.54825	0.995483	no
XLOC_001193	PA3180	gi|110227054|gb|AE004091.2|:3570413-3570851	65.671	66.0404	0.00809403	0.97405	0.995483	no
XLOC_001194	PA3184	gi|110227054|gb|AE004091.2|:3573979-3574837	55.247	58.4295	0.0808012	0.8944	0.995483	no
XLOC_001195	gapA	gi|110227054|gb|AE004091.2|:3587432-3588437	85.0586	77.5729	-0.132904	0.81985	0.995483	no
XLOC_001196	PA3201	gi|110227054|gb|AE004091.2|:3593143-3593731	371.427	261.625	-0.505577	0.3669	0.995483	no
XLOC_001197	PA3202	gi|110227054|gb|AE004091.2|:3593732-3594032	488.895	547.675	0.163796	0.79205	0.995483	no
XLOC_001198	PA3203	gi|110227054|gb|AE004091.2|:3594207-3594570	141.019	126.431	-0.157545	0.80845	0.995483	no
XLOC_001199	PA3204	gi|110227054|gb|AE004091.2|:3594580-3595258	53.7091	51.4119	-0.0630627	0.9198	0.995483	no
XLOC_001200	PA3205	gi|110227054|gb|AE004091.2|:3595386-3595827	37.4091	20.8178	-0.845573	0.3479	0.995483	no
XLOC_001201	PA3206	gi|110227054|gb|AE004091.2|:3595941-3597279	18.8134	11.8782	-0.663445	0.32695	0.995483	no
XLOC_001202	PA3207	gi|110227054|gb|AE004091.2|:3597318-3598339	94.2719	59.8356	-0.655825	0.4842	0.995483	no
XLOC_000115	spuB	gi|110227054|gb|AE004091.2|:335526-336885	174.967	102.056	-0.777718	0.177	0.995483	no
XLOC_001203	trkH	gi|110227054|gb|AE004091.2|:3598932-3600387	40.2688	22.894	-0.814693	0.20015	0.995483	no
XLOC_001204	PA3212	gi|110227054|gb|AE004091.2|:3600453-3602390	48.101	41.356	-0.217971	0.83495	0.995483	no
XLOC_001204	PA3211	gi|110227054|gb|AE004091.2|:3600453-3602390	96.2405	62.1222	-0.631535	0.3548	0.995483	no
XLOC_001205	PA3214	gi|110227054|gb|AE004091.2|:3602391-3603971	138.262	95.2724	-0.537272	0.5252	0.995483	no
XLOC_001205	PA3213	gi|110227054|gb|AE004091.2|:3602391-3603971	103.166	62.0978	-0.732354	0.33265	0.995483	no
XLOC_001206	PA3216	gi|110227054|gb|AE004091.2|:3605149-3605467	139.365	117.392	-0.247527	0.71805	0.995483	no
XLOC_001207	cyaB	gi|110227054|gb|AE004091.2|:3605683-3607075	56.3709	39.979	-0.495709	0.39965	0.995483	no
XLOC_001208	PA3220	gi|110227054|gb|AE004091.2|:3609075-3609840	119.285	72.1684	-0.724971	0.22955	0.995483	no
XLOC_001209	csaA	gi|110227054|gb|AE004091.2|:3609904-3610240	272.329	165.54	-0.718172	0.2627	0.995483	no
XLOC_001210	PA3222	gi|110227054|gb|AE004091.2|:3610249-3611149	17.873	21.2048	0.246603	0.7216	0.995483	no
XLOC_000014	plcB	gi|110227054|gb|AE004091.2|:27645-30498	68.0964	57.4679	-0.244821	0.7627	0.995483	no
XLOC_000116	spuC	gi|110227054|gb|AE004091.2|:336950-338321	244.265	132.183	-0.885909	0.1336	0.995483	no
XLOC_001211	PA3225	gi|110227054|gb|AE004091.2|:3612558-3613488	85.6764	203.371	1.24714	0.03635	0.995483	no
XLOC_001212	ppiA	gi|110227054|gb|AE004091.2|:3613494-3614867	187.383	190.125	0.0209531	0.97535	0.995483	no
XLOC_001212	PA3226	gi|110227054|gb|AE004091.2|:3613494-3614867	62.6456	93.9577	0.584797	0.48865	0.995483	no
XLOC_001213	PA3228	gi|110227054|gb|AE004091.2|:3614929-3616762	50.5783	80.154	0.664254	0.24025	0.995483	no
XLOC_001214	PA3229	gi|110227054|gb|AE004091.2|:3617043-3617310	7185.14	5088.42	-0.4978	0.4099	0.995483	no
XLOC_001215	PA3237	gi|110227054|gb|AE004091.2|:3624836-3625058	20.5404	30.7126	0.580368	0.75515	0.995483	no
XLOC_001216	PA3238	gi|110227054|gb|AE004091.2|:3625200-3626562	64.4833	53.8052	-0.261179	0.65665	0.995483	no
XLOC_001217	PA3239	gi|110227054|gb|AE004091.2|:3626565-3627369	53.303	49.673	-0.101757	0.86975	0.995483	no
XLOC_001218	PA3240	gi|110227054|gb|AE004091.2|:3627508-3628366	27.1707	52.2791	0.944183	0.15795	0.995483	no
XLOC_001219	minC	gi|110227054|gb|AE004091.2|:3630764-3631556	160.147	116.153	-0.46337	0.4166	0.995483	no
XLOC_000117	spuD	gi|110227054|gb|AE004091.2|:338436-339540	352.218	192.007	-0.875313	0.15185	0.995483	no
XLOC_001220	minE	gi|110227054|gb|AE004091.2|:3631617-3632684	3036.05	1574.73	-0.947089	0.36785	0.995483	no
XLOC_001220	minD	gi|110227054|gb|AE004091.2|:3631617-3632684	397.751	244.099	-0.704401	0.3474	0.995483	no
XLOC_001221	rluA	gi|110227054|gb|AE004091.2|:3632787-3633423	15.0729	13.1176	-0.200447	0.82245	0.995483	no
XLOC_001222	PA3247	gi|110227054|gb|AE004091.2|:3633591-3634881	64.9356	50.2191	-0.370772	0.5358	0.995483	no
XLOC_001223	PA3250	gi|110227054|gb|AE004091.2|:3636620-3637679	18.0172	29.0857	0.690937	0.29875	0.995483	no
XLOC_001224	PA3253	gi|110227054|gb|AE004091.2|:3637733-3640163	15.9528	10.7102	-0.574828	0.61915	0.995483	no
XLOC_001224	PA3252	gi|110227054|gb|AE004091.2|:3637733-3640163	14.9006	11.5914	-0.362314	0.7402	0.995483	no
XLOC_001224	PA3251	gi|110227054|gb|AE004091.2|:3637733-3640163	11.728	9.94791	-0.23749	0.8434	0.995483	no
XLOC_001225	PA3254	gi|110227054|gb|AE004091.2|:3640165-3641161	14.9607	23.746	0.666502	0.32755	0.995483	no
XLOC_001226	PA3255	gi|110227054|gb|AE004091.2|:3641232-3641811	66.2803	43.4488	-0.609263	0.3555	0.995483	no
XLOC_000118	spuE	gi|110227054|gb|AE004091.2|:339958-341056	72.2415	44.3728	-0.703152	0.236	0.995483	no
XLOC_001227	prc	gi|110227054|gb|AE004091.2|:3642963-3645060	333.503	199.741	-0.739564	0.2395	0.995483	no
XLOC_001228	PA3258	gi|110227054|gb|AE004091.2|:3645098-3646904	14.4301	35.1688	1.28521	0.04885	0.995483	no
XLOC_001229	PA3261	gi|110227054|gb|AE004091.2|:3648169-3648916	161.403	263.009	0.704447	0.23195	0.995483	no
XLOC_001230	PA3263	gi|110227054|gb|AE004091.2|:3651055-3651976	58.66	47.2631	-0.311664	0.61425	0.995483	no
XLOC_001231	PA3264	gi|110227054|gb|AE004091.2|:3652062-3652998	15.3764	14.2121	-0.113599	0.88145	0.995483	no
XLOC_001232	PA3265	gi|110227054|gb|AE004091.2|:3653137-3653452	47.6943	48.7174	0.0306226	0.94505	0.995483	no
XLOC_001233	capB	gi|110227054|gb|AE004091.2|:3653666-3653876	13782.6	6191.56	-1.15447	0.06095	0.995483	no
XLOC_001234	PA3271	gi|110227054|gb|AE004091.2|:3660021-3663501	99.9015	55.6338	-0.844546	0.16495	0.995483	no
XLOC_001235	PA3274	gi|110227054|gb|AE004091.2|:3668473-3668761	62.5165	125.928	1.01029	0.20535	0.995483	no
XLOC_001236	PA3287	gi|110227054|gb|AE004091.2|:3677462-3680461	15.1676	31.852	1.07039	0.66815	0.995483	no
XLOC_000119	spuF	gi|110227054|gb|AE004091.2|:341110-342265	61.0613	37.1354	-0.717463	0.23175	0.995483	no
XLOC_001237	PA3289	gi|110227054|gb|AE004091.2|:3681047-3681461	73.148	87.3821	0.256519	0.70195	0.995483	no
XLOC_001238	phoA	gi|110227054|gb|AE004091.2|:3689520-3690951	3.38108	6.58989	0.962771	0.29885	0.995483	no
XLOC_001239	PA3301	gi|110227054|gb|AE004091.2|:3699368-3700786	35.6873	33.7002	-0.0826526	0.93925	0.995483	no
XLOC_001239	PA3302	gi|110227054|gb|AE004091.2|:3699368-3700786	270.175	143.375	-0.914098	0.18415	0.995483	no
XLOC_001240	PA3303	gi|110227054|gb|AE004091.2|:3700936-3702950	7.31549	24.226	1.72753	0.1764	0.995483	no
XLOC_001241	hepA	gi|110227054|gb|AE004091.2|:3707089-3709942	59.756	40.826	-0.549594	0.3251	0.995483	no
XLOC_001242	PA3309	gi|110227054|gb|AE004091.2|:3710224-3710680	18368.8	42509.1	1.21051	0.09175	0.995483	no
XLOC_001243	PA3311	gi|110227054|gb|AE004091.2|:3712559-3722759	28.6335	40.4872	0.499763	0.70195	0.995483	no
XLOC_001244	PA3315	gi|110227054|gb|AE004091.2|:3712559-3722759	0	0	0	1	1	no
XLOC_001244	PA3316	gi|110227054|gb|AE004091.2|:3712559-3722759	2.94302	5.0515	0.779413	0.7683	0.995483	no
XLOC_000120	spuG	gi|110227054|gb|AE004091.2|:342291-343173	101.345	94.9606	-0.0938774	0.87175	0.995483	no
XLOC_001244	PA3314	gi|110227054|gb|AE004091.2|:3712559-3722759	0	0	0	1	1	no
XLOC_001244	PA3313	gi|110227054|gb|AE004091.2|:3712559-3722759	51.3993	36.7173	-0.48529	0.5586	0.995483	no
XLOC_001244	PA3317	gi|110227054|gb|AE004091.2|:3712559-3722759	27.7908	4.32655	-2.68332	0.45215	0.995483	no
XLOC_001244	PA3318	gi|110227054|gb|AE004091.2|:3712559-3722759	0	0	0	1	1	no
XLOC_001245	PA3321	gi|110227054|gb|AE004091.2|:3723533-3724448	30.827	30.1991	-0.029689	0.9656	0.995483	no
XLOC_001246	PA3325	gi|110227054|gb|AE004091.2|:3725552-3743939	0	0	0	1	1	no
XLOC_001246	PA3323	gi|110227054|gb|AE004091.2|:3725552-3743939	0	0	0	1	1	no
XLOC_001246	PA3324	gi|110227054|gb|AE004091.2|:3725552-3743939	15.0544	21.6223	0.522336	0.66425	0.995483	no
XLOC_001247	PA3328	gi|110227054|gb|AE004091.2|:3725552-3743939	0	0	0	1	1	no
XLOC_001247	PA3327	gi|110227054|gb|AE004091.2|:3725552-3743939	12.1331	84.9915	2.80838	0.0002	0.274837	no
XLOC_000121	spuH	gi|110227054|gb|AE004091.2|:343255-344125	93.3859	97.1568	0.0571107	0.9213	0.995483	no
XLOC_001247	PA3329	gi|110227054|gb|AE004091.2|:3725552-3743939	0	5.29947	inf	0.1555	0.995483	no
XLOC_001247	PA3330	gi|110227054|gb|AE004091.2|:3725552-3743939	0	33.4527	inf	0.17195	0.995483	no
XLOC_001247	PA3331	gi|110227054|gb|AE004091.2|:3725552-3743939	0	0	0	1	1	no
XLOC_001247	PA3332	gi|110227054|gb|AE004091.2|:3725552-3743939	0	38.1462	inf	0.15315	0.995483	no
XLOC_001247	fabH2	gi|110227054|gb|AE004091.2|:3725552-3743939	0	0	0	1	1	no
XLOC_001247	PA3334	gi|110227054|gb|AE004091.2|:3725552-3743939	0	142.753	inf	0.15585	0.995483	no
XLOC_001248	PA3335	gi|110227054|gb|AE004091.2|:3744056-3744809	18.3372	105.409	2.52316	0.0022	0.632306	no
XLOC_001249	PA3336	gi|110227054|gb|AE004091.2|:3744900-3746067	42.4569	121.904	1.52168	0.0127	0.995483	no
XLOC_001250	plpD	gi|110227054|gb|AE004091.2|:3747524-3766433	15.246	16.1762	0.0854415	0.96985	0.995483	no
XLOC_001251	PA3353	gi|110227054|gb|AE004091.2|:3747524-3766433	0	0	0	1	1	no
XLOC_000122	PA0306	gi|110227054|gb|AE004091.2|:346800-350069	18.8423	18.207	-0.0494761	0.56175	0.995483	no
XLOC_001251	PA3352	gi|110227054|gb|AE004091.2|:3747524-3766433	0	0	0	1	1	no
XLOC_001251	flgM	gi|110227054|gb|AE004091.2|:3747524-3766433	1511.71	2430.86	0.685279	0.7302	0.995483	no
XLOC_001251	PA3350	gi|110227054|gb|AE004091.2|:3747524-3766433	537.108	744.536	0.47113	0.6588	0.995483	no
XLOC_001252	dsdA	gi|110227054|gb|AE004091.2|:3768183-3769530	18.6654	28.2847	0.599653	0.3529	0.995483	no
XLOC_001253	PA3358	gi|110227054|gb|AE004091.2|:3769586-3770465	5.26527	11.4255	1.11768	0.2475	0.995483	no
XLOC_001254	lecB	gi|110227054|gb|AE004091.2|:3773028-3779369	122.854	112.072	-0.132515	0.93755	0.995483	no
XLOC_001255	PA3368	gi|110227054|gb|AE004091.2|:3773028-3779369	0	0	0	1	1	no
XLOC_001255	PA3367	gi|110227054|gb|AE004091.2|:3773028-3779369	61.7504	36.5743	-0.75562	0.7097	0.995483	no
XLOC_001256	PA3369	gi|110227054|gb|AE004091.2|:3779561-3779840	54.0145	118.692	1.1358	0.20955	0.995483	no
XLOC_001257	PA3370	gi|110227054|gb|AE004091.2|:3779929-3780076	0	0	0	1	1	no
XLOC_000123	PA0308	gi|110227054|gb|AE004091.2|:346800-350069	66.7972	43.6373	-0.614227	0.7745	0.995483	no
XLOC_001258	PA3371	gi|110227054|gb|AE004091.2|:3780127-3780313	64.3294	87.6223	0.44582	0.75605	0.995483	no
XLOC_001259	amrZ	gi|110227054|gb|AE004091.2|:3791346-3791673	3332.44	3632.91	0.124547	0.83615	0.995483	no
XLOC_001260	PA3386	gi|110227054|gb|AE004091.2|:3791826-3792192	21.8562	34.0521	0.639701	0.51765	0.995483	no
XLOC_001261	rhlG	gi|110227054|gb|AE004091.2|:3792289-3793060	8.35571	15.3452	0.876956	0.3319	0.995483	no
XLOC_001262	PA3388	gi|110227054|gb|AE004091.2|:3793112-3793808	19.2548	23.0818	0.26154	0.7332	0.995483	no
XLOC_001263	PA3389	gi|110227054|gb|AE004091.2|:3794177-3794591	33.7606	14.0436	-1.26543	0.2047	0.995483	no
XLOC_001264	nosL	gi|110227054|gb|AE004091.2|:3794818-3818542	3.46405	3.25642	-0.0891742	1	1	no
XLOC_001264	nosY	gi|110227054|gb|AE004091.2|:3794818-3818542	0	1.18758	inf	1	1	no
XLOC_001264	nosF	gi|110227054|gb|AE004091.2|:3794818-3818542	2.90269	9.7334	1.74555	0.59265	0.995483	no
XLOC_001264	nosD	gi|110227054|gb|AE004091.2|:3794818-3818542	5.58197	3.84244	-0.538752	0.83495	0.995483	no
XLOC_000124	PA0310	gi|110227054|gb|AE004091.2|:350889-351588	100.476	70.1814	-0.517689	0.40245	0.995483	no
XLOC_001264	nosR	gi|110227054|gb|AE004091.2|:3794818-3818542	6.70447	9.37481	0.483666	0.84875	0.995483	no
XLOC_001264	nosZ	gi|110227054|gb|AE004091.2|:3794818-3818542	3.46596	3.64989	0.0745949	1	1	no
XLOC_001265	PA3398	gi|110227054|gb|AE004091.2|:3794818-3818542	46.9088	52.5834	0.164749	0.9347	0.995483	no
XLOC_001266	PA3403a	gi|110227054|gb|AE004091.2|:3794818-3818542	34.7314	37.0377	0.0927548	0.91995	0.995483	no
XLOC_001267	PA3413	gi|110227054|gb|AE004091.2|:3820005-3826831	275.539	429.321	0.639801	0.7592	0.995483	no
XLOC_001267	PA3414	gi|110227054|gb|AE004091.2|:3820005-3826831	0	4.44568	inf	1	1	no
XLOC_001268	PA3419	gi|110227054|gb|AE004091.2|:3820005-3826831	28.2032	25.8486	-0.125771	0.9061	0.995483	no
XLOC_001269	PA3423	gi|110227054|gb|AE004091.2|:3832939-3833683	59.2169	49.5459	-0.257244	0.6857	0.995483	no
XLOC_001270	PA3425	gi|110227054|gb|AE004091.2|:3833773-3835559	39.1202	23.9345	-0.70882	0.5424	0.995483	no
XLOC_001270	PA3424	gi|110227054|gb|AE004091.2|:3833773-3835559	11.3416	48.1795	2.08679	0.0077	0.995483	no
XLOC_000125	PA0312	gi|110227054|gb|AE004091.2|:352429-352924	174.787	164.794	-0.084932	0.89185	0.995483	no
XLOC_001271	PA3433	gi|110227054|gb|AE004091.2|:3840843-3841737	18.8868	15.5544	-0.280057	0.69515	0.995483	no
XLOC_001272	PA3436	gi|110227054|gb|AE004091.2|:3844384-3844942	10.0291	6.56787	-0.610689	0.59335	0.995483	no
XLOC_001273	folM	gi|110227054|gb|AE004091.2|:3845052-3845757	78.0015	76.6882	-0.0244963	0.96775	0.995483	no
XLOC_001274	folE1	gi|110227054|gb|AE004091.2|:3845774-3846335	72.9298	42.8047	-0.768737	0.252	0.995483	no
XLOC_001275	folX	gi|110227054|gb|AE004091.2|:3846336-3846708	129.991	106.396	-0.288968	0.65255	0.995483	no
XLOC_001276	PA3440	gi|110227054|gb|AE004091.2|:3846836-3847148	81.6673	35.2804	-1.21089	0.19445	0.995483	no
XLOC_001277	PA3440a	gi|110227054|gb|AE004091.2|:3847199-3847538	109.15	81.0259	-0.429854	0.54	0.995483	no
XLOC_001278	PA3451	gi|110227054|gb|AE004091.2|:3856336-3856546	254.187	96.3131	-1.40009	0.22565	0.995483	no
XLOC_001279	mqoA	gi|110227054|gb|AE004091.2|:3856748-3858320	38.993	20.6998	-0.913603	0.14535	0.995483	no
XLOC_001280	PA3456	gi|110227054|gb|AE004091.2|:3862308-3864273	29.2851	24.7234	-0.244289	0.68715	0.995483	no
XLOC_000015	PA0032	gi|110227054|gb|AE004091.2|:34623-35538	39.9918	39.1644	-0.0301587	0.9575	0.995483	no
XLOC_000126	PA0315	gi|110227054|gb|AE004091.2|:353690-362857	529.522	345.639	-0.615424	0.6665	0.995483	no
XLOC_001281	PA3457	gi|110227054|gb|AE004091.2|:3864373-3875979	74.4275	73.7255	-0.0136721	0.7744	0.995483	no
XLOC_001282	PA3460	gi|110227054|gb|AE004091.2|:3864373-3875979	0	6.43178	inf	0.10925	0.995483	no
XLOC_001282	PA3463	gi|110227054|gb|AE004091.2|:3864373-3875979	43.3388	5.71991	-2.92159	0.41595	0.995483	no
XLOC_001282	PA3462	gi|110227054|gb|AE004091.2|:3864373-3875979	0	0	0	1	1	no
XLOC_001282	PA3461	gi|110227054|gb|AE004091.2|:3864373-3875979	0	0	0	1	1	no
XLOC_001282	PA3459	gi|110227054|gb|AE004091.2|:3864373-3875979	157.007	206.173	0.393031	0.7563	0.995483	no
XLOC_001283	PA3465	gi|110227054|gb|AE004091.2|:3875993-3879373	150.701	217.091	0.526611	0.4299	0.995483	no
XLOC_001284	PA3467	gi|110227054|gb|AE004091.2|:3879558-3880926	9.16445	13.8888	0.599798	0.40975	0.995483	no
XLOC_001285	PA3470	gi|110227054|gb|AE004091.2|:3881092-3888084	19.3698	5.27065	-1.87776	0.5795	0.995483	no
XLOC_001285	PA3469	gi|110227054|gb|AE004091.2|:3881092-3888084	2.91709	0.0237886	-6.93811	1	1	no
XLOC_000127	PA0320	gi|110227054|gb|AE004091.2|:353690-362857	0	0	0	1	1	no
XLOC_001285	PA3468	gi|110227054|gb|AE004091.2|:3881092-3888084	26.5614	23.6357	-0.168368	0.9117	0.995483	no
XLOC_001286	PA3472	gi|110227054|gb|AE004091.2|:3881092-3888084	155.981	107.623	-0.535384	0.5954	0.995483	no
XLOC_001287	metG	gi|110227054|gb|AE004091.2|:3892120-3897357	125.682	87.8012	-0.517472	0.5687	0.995483	no
XLOC_001288	PA3483	gi|110227054|gb|AE004091.2|:3897390-3898191	47.6183	55.5286	0.221715	0.7306	0.995483	no
XLOC_001289	PA3485	gi|110227054|gb|AE004091.2|:3898277-3899938	60.6193	71.6609	0.241408	0.79525	0.995483	no
XLOC_001289	PA3484	gi|110227054|gb|AE004091.2|:3898277-3899938	14.4814	20.395	0.494018	0.5634	0.995483	no
XLOC_001290	PA3486	gi|110227054|gb|AE004091.2|:3900232-3902659	10.4005	16.8666	0.697523	0.2796	0.995483	no
XLOC_001291	pldA	gi|110227054|gb|AE004091.2|:3902662-3905962	19.15	41.3882	1.11187	0.0634	0.995483	no
XLOC_001292	PA3488	gi|110227054|gb|AE004091.2|:3906054-3907089	19.25	48.5166	1.33362	0.04635	0.995483	no
XLOC_001293	PA3489	gi|110227054|gb|AE004091.2|:3907267-3910736	40.3859	19.2061	-1.07229	0.49225	0.995483	no
XLOC_000127	PA0319	gi|110227054|gb|AE004091.2|:353690-362857	0	0	0	1	1	no
XLOC_001293	PA3490	gi|110227054|gb|AE004091.2|:3907267-3910736	19.5619	13.7318	-0.510522	0.79075	0.995483	no
XLOC_001293	PA3491	gi|110227054|gb|AE004091.2|:3907267-3910736	22.0804	21.0189	-0.0710754	0.91605	0.995483	no
XLOC_001294	PA3494	gi|110227054|gb|AE004091.2|:3910738-3930230	14.8319	20.6093	0.474593	0.7836	0.995483	no
XLOC_001294	PA3493	gi|110227054|gb|AE004091.2|:3910738-3930230	18.7929	21.9278	0.222572	0.83135	0.995483	no
XLOC_001294	PA3492	gi|110227054|gb|AE004091.2|:3910738-3930230	9.26855	8.0861	-0.196899	0.8672	0.995483	no
XLOC_001294	nth	gi|110227054|gb|AE004091.2|:3910738-3930230	58.5157	35.2539	-0.731038	0.36015	0.995483	no
XLOC_001295	PA3496	gi|110227054|gb|AE004091.2|:3910738-3930230	1853.74	1193.98	-0.634654	0.7205	0.995483	no
XLOC_001296	gloA1	gi|110227054|gb|AE004091.2|:3944183-3946982	1529.43	910.563	-0.748161	0.495	0.995483	no
XLOC_001297	rnt	gi|110227054|gb|AE004091.2|:3947094-3948812	115.643	87.8777	-0.39611	0.55815	0.995483	no
XLOC_001297	pyrC	gi|110227054|gb|AE004091.2|:3947094-3948812	32.3299	23.1187	-0.483809	0.6391	0.995483	no
XLOC_000127	PA0318	gi|110227054|gb|AE004091.2|:353690-362857	109.94	180.279	0.713512	0.677	0.995483	no
XLOC_001298	PA3530	gi|110227054|gb|AE004091.2|:3949852-3950074	595.671	225.226	-1.40314	0.07195	0.995483	no
XLOC_001299	bfrB	gi|110227054|gb|AE004091.2|:3950283-3950760	8872.02	4901	-0.856187	0.2137	0.995483	no
XLOC_001300	PA3535	gi|110227054|gb|AE004091.2|:3954906-3957894	8.73118	10.3199	0.241181	0.7037	0.995483	no
XLOC_001301	argF	gi|110227054|gb|AE004091.2|:3959032-3959950	33.1866	43.2306	0.381452	0.55045	0.995483	no
XLOC_001302	PA3538	gi|110227054|gb|AE004091.2|:3959954-3961037	56.6215	57.3609	0.0187164	0.97605	0.995483	no
XLOC_001303	PA3539	gi|110227054|gb|AE004091.2|:3961143-3961923	28.7886	22.6626	-0.345187	0.61125	0.995483	no
XLOC_001304	algD	gi|110227054|gb|AE004091.2|:3962824-3964135	11.7773	14.9034	0.339634	0.61275	0.995483	no
XLOC_001305	alg8	gi|110227054|gb|AE004091.2|:3964274-3965759	12.0292	16.8364	0.485038	0.45775	0.995483	no
XLOC_001306	alg44	gi|110227054|gb|AE004091.2|:3965841-3967011	4.90726	5.57151	0.183151	0.843	0.995483	no
XLOC_001307	algE	gi|110227054|gb|AE004091.2|:3967024-3969921	1.86814	8.23181	2.13961	0.10425	0.995483	no
XLOC_000127	PA0317	gi|110227054|gb|AE004091.2|:353690-362857	150.376	96.3596	-0.642075	0.5201	0.995483	no
XLOC_001307	algK	gi|110227054|gb|AE004091.2|:3967024-3969921	5.32614	7.70694	0.533069	0.5535	0.995483	no
XLOC_001308	algG	gi|110227054|gb|AE004091.2|:3969941-3971573	47.3171	79.5736	0.749929	0.18975	0.995483	no
XLOC_001309	algX	gi|110227054|gb|AE004091.2|:3971585-3973010	2.9123	9.38129	1.68763	0.082	0.995483	no
XLOC_001310	algL	gi|110227054|gb|AE004091.2|:3973013-3974117	1.3167	10.8331	3.04044	0.1004	0.995483	no
XLOC_001311	algI	gi|110227054|gb|AE004091.2|:3974358-3975921	13.0837	10.6661	-0.294738	0.663	0.995483	no
XLOC_001312	algJ	gi|110227054|gb|AE004091.2|:3975935-3977111	0.609624	3.11477	2.35313	1	1	no
XLOC_001313	algF	gi|110227054|gb|AE004091.2|:3977183-3977834	6.6218	5.22299	-0.342349	0.7715	0.995483	no
XLOC_001314	algA	gi|110227054|gb|AE004091.2|:3978030-3979476	7.15772	6.23948	-0.198075	0.80935	0.995483	no
XLOC_001315	arnA	gi|110227054|gb|AE004091.2|:3979859-3988684	11.623	16.8288	0.533948	0.6204	0.995483	no
XLOC_001315	arnC	gi|110227054|gb|AE004091.2|:3979859-3988684	12.343	11.1152	-0.151162	0.93415	0.995483	no
XLOC_000128	PA0327	gi|110227054|gb|AE004091.2|:367456-368422	25.6561	25.1127	-0.0308821	0.9679	0.995483	no
XLOC_001315	arnB	gi|110227054|gb|AE004091.2|:3979859-3988684	25.0811	16.7273	-0.584399	0.65415	0.995483	no
XLOC_001315	arnD	gi|110227054|gb|AE004091.2|:3979859-3988684	6.92809	14.7088	1.08615	0.46895	0.995483	no
XLOC_001315	arnT	gi|110227054|gb|AE004091.2|:3979859-3988684	9.83755	8.62835	-0.189215	0.91075	0.995483	no
XLOC_001315	arnE	gi|110227054|gb|AE004091.2|:3979859-3988684	8.19013	13.4484	0.715475	0.726	0.995483	no
XLOC_001315	arnF	gi|110227054|gb|AE004091.2|:3979859-3988684	2.81339	6.24158	1.1496	0.62695	0.995483	no
XLOC_001315	arnF	gi|110227054|gb|AE004091.2|:3979859-3988684	9.95203	12.4445	0.322442	0.8471	0.995483	no
XLOC_001316	fruR	gi|110227054|gb|AE004091.2|:3994738-3995728	48.9932	34.6067	-0.501531	0.42105	0.995483	no
XLOC_001317	PA3564	gi|110227054|gb|AE004091.2|:3995840-3996518	37.4714	26.7624	-0.485586	0.48165	0.995483	no
XLOC_001318	PA3567	gi|110227054|gb|AE004091.2|:3997821-4006145	8.56093	18.0023	1.07234	0.68855	0.995483	no
XLOC_001318	PA3566	gi|110227054|gb|AE004091.2|:3997821-4006145	30.9392	47.0736	0.605482	0.792	0.995483	no
XLOC_000129	ilvA1	gi|110227054|gb|AE004091.2|:372090-373605	74.5935	59.3858	-0.328932	0.5643	0.995483	no
XLOC_001319	PA3572	gi|110227054|gb|AE004091.2|:3997821-4006145	13800.3	13506	-0.031096	0.69295	0.995483	no
XLOC_001319	mmsR	gi|110227054|gb|AE004091.2|:3997821-4006145	528.519	580.699	0.135836	0.89195	0.995483	no
XLOC_001320	nalD	gi|110227054|gb|AE004091.2|:4006509-4007324	104.784	74.3398	-0.495208	0.4651	0.995483	no
XLOC_001321	PA3575	gi|110227054|gb|AE004091.2|:4007506-4008037	115.788	64.9008	-0.83518	0.1916	0.995483	no
XLOC_001322	PA3576	gi|110227054|gb|AE004091.2|:4008135-4008558	110.626	143.837	0.378752	0.5408	0.995483	no
XLOC_001323	glpF	gi|110227054|gb|AE004091.2|:4012805-4013645	30.7326	32.1399	0.0645981	0.9221	0.995483	no
XLOC_001324	glpK	gi|110227054|gb|AE004091.2|:4013684-4015202	30.2204	27.1888	-0.152511	0.8045	0.995483	no
XLOC_001325	glpR	gi|110227054|gb|AE004091.2|:4015407-4016163	24.6745	19.3931	-0.347481	0.63325	0.995483	no
XLOC_001326	glpD	gi|110227054|gb|AE004091.2|:4016440-4017979	27.0815	28.5307	0.0752088	0.8988	0.995483	no
XLOC_001327	glpM	gi|110227054|gb|AE004091.2|:4018072-4019444	45.6501	24.6297	-0.89022	0.30605	0.995483	no
XLOC_000130	PA0332	gi|110227054|gb|AE004091.2|:373724-374192	132.139	211.194	0.676514	0.264	0.995483	no
XLOC_001328	metR	gi|110227054|gb|AE004091.2|:4019445-4021919	52.729	43.0286	-0.293301	0.68125	0.995483	no
XLOC_001329	PA3594	gi|110227054|gb|AE004091.2|:4028652-4029540	20.7843	24.0244	0.209006	0.76165	0.995483	no
XLOC_001330	PA3595	gi|110227054|gb|AE004091.2|:4029758-4032238	8.8455	15.6426	0.822464	0.30915	0.995483	no
XLOC_001331	PA3602	gi|110227054|gb|AE004091.2|:4033849-4040100	0	0	0	1	1	no
XLOC_001331	PA3599	gi|110227054|gb|AE004091.2|:4033849-4040100	83.9263	74.5681	-0.170564	0.8715	0.995483	no
XLOC_001332	PA3605	gi|110227054|gb|AE004091.2|:4033849-4040100	24.5805	16.2437	-0.597629	0.64155	0.995483	no
XLOC_001333	potA	gi|110227054|gb|AE004091.2|:4041078-4042170	20.0172	21.578	0.10832	0.87425	0.995483	no
XLOC_001334	potC	gi|110227054|gb|AE004091.2|:4042174-4043831	7.31124	8.26281	0.176516	0.8898	0.995483	no
XLOC_001334	potB	gi|110227054|gb|AE004091.2|:4042174-4043831	16.3113	13.124	-0.313665	0.7085	0.995483	no
XLOC_001335	potD	gi|110227054|gb|AE004091.2|:4043919-4044984	16.5155	26.9331	0.70556	0.299	0.995483	no
XLOC_000131	PA0333	gi|110227054|gb|AE004091.2|:374242-375514	38.8407	52.951	0.447088	0.46775	0.995483	no
XLOC_001336	PA3611	gi|110227054|gb|AE004091.2|:4045159-4045570	85.6201	99.6819	0.219382	0.7428	0.995483	no
XLOC_001337	PA3612	gi|110227054|gb|AE004091.2|:4045588-4045810	41.0808	81.9003	0.995405	0.5539	0.995483	no
XLOC_001338	PA3614	gi|110227054|gb|AE004091.2|:4048518-4049922	318.053	328.443	0.0463719	0.93835	0.995483	no
XLOC_001339	PA3615	gi|110227054|gb|AE004091.2|:4050004-4051075	346.477	415.566	0.262319	0.65875	0.995483	no
XLOC_001340	PA3619	gi|110227054|gb|AE004091.2|:4053391-4054399	19.159	20.4704	0.0955171	0.8895	0.995483	no
XLOC_001341	mutS	gi|110227054|gb|AE004091.2|:4054524-4057092	53.1649	40.5881	-0.389417	0.4887	0.995483	no
XLOC_001342	fdxA	gi|110227054|gb|AE004091.2|:4057158-4057482	230.603	221.079	-0.0608491	0.92285	0.995483	no
XLOC_001343	PA3630	gi|110227054|gb|AE004091.2|:4065118-4066027	17.6451	26.6468	0.594693	0.39	0.995483	no
XLOC_001344	PA3632	gi|110227054|gb|AE004091.2|:4066102-4067543	344.98	83.6565	-2.04396	0.2438	0.995483	no
XLOC_001344	PA3631	gi|110227054|gb|AE004091.2|:4066102-4067543	38.7917	32.5179	-0.254513	0.695	0.995483	no
XLOC_000132	ygdP	gi|110227054|gb|AE004091.2|:378095-378575	1141.98	836.501	-0.449092	0.45405	0.995483	no
XLOC_001345	map	gi|110227054|gb|AE004091.2|:4095171-4095957	722.482	427.93	-0.755588	0.2048	0.995483	no
XLOC_001346	glnD	gi|110227054|gb|AE004091.2|:4096123-4098826	47.2097	33.2635	-0.505144	0.37155	0.995483	no
XLOC_001347	PA3659	gi|110227054|gb|AE004091.2|:4098843-4100052	30.0707	30.1322	0.00294536	0.9853	0.995483	no
XLOC_001348	PA3662	gi|110227054|gb|AE004091.2|:4102013-4112001	421.315	609.394	0.532475	0.369	0.995483	no
XLOC_001348	PA3661	gi|110227054|gb|AE004091.2|:4102013-4112001	106.84	170.053	0.670526	0.68635	0.995483	no
XLOC_001349	PA3668	gi|110227054|gb|AE004091.2|:4102013-4112001	21.7717	56.1307	1.36634	0.66025	0.995483	no
XLOC_001349	PA3667	gi|110227054|gb|AE004091.2|:4102013-4112001	0	0	0	1	1	no
XLOC_001349	dapD	gi|110227054|gb|AE004091.2|:4102013-4112001	31.5767	2.35708	-3.74379	0.4537	0.995483	no
XLOC_001349	PA3665	gi|110227054|gb|AE004091.2|:4102013-4112001	10.5115	0	#NAME?	0.13175	0.995483	no
XLOC_001349	PA3664	gi|110227054|gb|AE004091.2|:4102013-4112001	190.418	201.676	0.08287	0.96075	0.995483	no
XLOC_000016	PA0032a	gi|110227054|gb|AE004091.2|:35548-36270	179.815	102.874	-0.805639	0.2382	0.995483	no
XLOC_000133	ptsP	gi|110227054|gb|AE004091.2|:378597-380877	263.567	243.035	-0.117005	0.84405	0.995483	no
XLOC_001350	PA3675	gi|110227054|gb|AE004091.2|:4112082-4123205	40.3726	26.3736	-0.614282	0.7715	0.995483	no
XLOC_001350	PA3674	gi|110227054|gb|AE004091.2|:4112082-4123205	96.0851	33.0933	-1.53778	0.6502	0.995483	no
XLOC_001350	plsB	gi|110227054|gb|AE004091.2|:4112082-4123205	50.528	38.4008	-0.395949	0.68035	0.995483	no
XLOC_001351	PA3678	gi|110227054|gb|AE004091.2|:4112082-4123205	132.301	132.621	0.00348168	0.9975	0.998154	no
XLOC_001352	PA3688	gi|110227054|gb|AE004091.2|:4130598-4130943	133.81	139.491	0.0599785	0.92735	0.995483	no
XLOC_001353	PA3690	gi|110227054|gb|AE004091.2|:4131535-4133758	24.0763	29.6033	0.298146	0.6308	0.995483	no
XLOC_001354	lptF	gi|110227054|gb|AE004091.2|:4134137-4157089	0	0	0	1	1	no
XLOC_001354	PA3691	gi|110227054|gb|AE004091.2|:4134137-4157089	423.951	704.332	0.732357	0.75815	0.995483	no
XLOC_001355	PA3711	gi|110227054|gb|AE004091.2|:4134137-4157089	35.4409	29.1488	-0.28198	0.91025	0.995483	no
XLOC_001356	PA3715	gi|110227054|gb|AE004091.2|:4158142-4163679	8.8774	1.17811	-2.91367	0.51795	0.995483	no
XLOC_000134	PA0338	gi|110227054|gb|AE004091.2|:380902-382033	84.3734	59.1294	-0.512913	0.39235	0.995483	no
XLOC_001356	PA3714	gi|110227054|gb|AE004091.2|:4158142-4163679	0	0	0	1	1	no
XLOC_001356	spdH	gi|110227054|gb|AE004091.2|:4158142-4163679	21.5269	22.5424	0.0664991	0.94305	0.995483	no
XLOC_001357	PA3717	gi|110227054|gb|AE004091.2|:4163889-4164231	89.7079	93.3573	0.0575286	0.9326	0.995483	no
XLOC_001358	nalC	gi|110227054|gb|AE004091.2|:4166517-4167159	52.7095	35.7776	-0.559005	0.3965	0.995483	no
XLOC_001359	PA3733	gi|110227054|gb|AE004091.2|:4183709-4184939	94.1428	76.4233	-0.300838	0.5991	0.995483	no
XLOC_001360	PA3734	gi|110227054|gb|AE004091.2|:4185521-4186727	13.6019	19.4763	0.517909	0.45235	0.995483	no
XLOC_001361	PA3739	gi|110227054|gb|AE004091.2|:4191726-4193562	17.0706	21.7074	0.346672	0.57845	0.995483	no
XLOC_001362	PA3740	gi|110227054|gb|AE004091.2|:4193674-4194361	263.55	147.256	-0.83975	0.14565	0.995483	no
XLOC_001363	PA3747	gi|110227054|gb|AE004091.2|:4198842-4199643	117.062	62.8202	-0.897967	0.1326	0.995483	no
XLOC_001364	PA3748	gi|110227054|gb|AE004091.2|:4199655-4200948	38.6364	23.186	-0.736709	0.2417	0.995483	no
XLOC_000135	PA0340	gi|110227054|gb|AE004091.2|:382913-383717	52.3159	33.4874	-0.643633	0.31905	0.995483	no
XLOC_001365	PA3749	gi|110227054|gb|AE004091.2|:4201251-4202565	8.54219	13.0434	0.610643	0.40315	0.995483	no
XLOC_001367	PA3755	gi|110227054|gb|AE004091.2|:4206047-4206602	104.517	195.848	0.905992	0.1283	0.995483	no
XLOC_001368	PA3756	gi|110227054|gb|AE004091.2|:4206664-4207165	201.137	152.63	-0.398133	0.5162	0.995483	no
XLOC_001369	PA3761	gi|110227054|gb|AE004091.2|:4207407-4230027	0.529935	1.27969	1.2719	1	1	no
XLOC_001369	PA3760	gi|110227054|gb|AE004091.2|:4207407-4230027	4.0182	5.91139	0.556949	0.8341	0.995483	no
XLOC_001369	PA3759	gi|110227054|gb|AE004091.2|:4207407-4230027	0.135161	0	#NAME?	1	1	no
XLOC_001369	PA3758	gi|110227054|gb|AE004091.2|:4207407-4230027	0	1.22042	inf	1	1	no
XLOC_001369	PA3757	gi|110227054|gb|AE004091.2|:4207407-4230027	11.7592	10.3965	-0.177689	0.89345	0.995483	no
XLOC_001370	PA3764	gi|110227054|gb|AE004091.2|:4207407-4230027	92.8712	42.8638	-1.11547	0.5987	0.995483	no
XLOC_001371	PA3771	gi|110227054|gb|AE004091.2|:4207407-4230027	33.6784	54.226	0.687161	0.78965	0.995483	no
XLOC_000136	lgt	gi|110227054|gb|AE004091.2|:383726-384527	71.4274	56.6503	-0.334393	0.58775	0.995483	no
XLOC_001372	PA3772	gi|110227054|gb|AE004091.2|:4230161-4231058	9.40255	11.6158	0.304963	0.71835	0.995483	no
XLOC_001373	PA3773	gi|110227054|gb|AE004091.2|:4231070-4232228	2.48447	4.2308	0.767994	1	1	no
XLOC_001374	PA3774	gi|110227054|gb|AE004091.2|:4232257-4234167	4.41721	3.22341	-0.454551	1	1	no
XLOC_001375	PA3776	gi|110227054|gb|AE004091.2|:4234274-4235183	6.72195	5.23419	-0.360913	0.72455	0.995483	no
XLOC_001376	xseA	gi|110227054|gb|AE004091.2|:4235219-4236599	55.9378	52.9867	-0.0781941	0.89335	0.995483	no
XLOC_001377	PA3778	gi|110227054|gb|AE004091.2|:4236605-4237541	38.0364	39.4271	0.0518078	0.93445	0.995483	no
XLOC_001378	PA3779	gi|110227054|gb|AE004091.2|:4237692-4238733	14.865	12.0429	-0.303733	0.6835	0.995483	no
XLOC_001379	PA3781	gi|110227054|gb|AE004091.2|:4238807-4240579	12.1051	13.1279	0.117011	0.8736	0.995483	no
XLOC_001379	PA3780	gi|110227054|gb|AE004091.2|:4238807-4240579	12.1944	6.81906	-0.838576	0.68465	0.995483	no
XLOC_001380	PA3783	gi|110227054|gb|AE004091.2|:4242415-4243045	31.9591	54.7619	0.776948	0.25565	0.995483	no
XLOC_000137	thyA	gi|110227054|gb|AE004091.2|:384732-385527	198.417	142.197	-0.480647	0.397	0.995483	no
XLOC_001381	PA3787	gi|110227054|gb|AE004091.2|:4244875-4245724	67.0367	102.883	0.617986	0.3036	0.995483	no
XLOC_001382	PA3788	gi|110227054|gb|AE004091.2|:4245809-4246205	27.6843	34.0282	0.297662	0.73715	0.995483	no
XLOC_001383	leuA	gi|110227054|gb|AE004091.2|:4250827-4252606	134.731	110.52	-0.285776	0.62815	0.995483	no
XLOC_001384	PA3795	gi|110227054|gb|AE004091.2|:4253698-4254649	40.4456	50.775	0.328135	0.59655	0.995483	no
XLOC_001385	PA3818	gi|110227054|gb|AE004091.2|:4274501-4275317	173.23	101.799	-0.766963	0.18195	0.995483	no
XLOC_001387	PA3826	gi|110227054|gb|AE004091.2|:4283787-4284285	82.4805	56.2594	-0.551958	0.40715	0.995483	no
XLOC_001388	holC	gi|110227054|gb|AE004091.2|:4288942-4290855	23.6384	36.4896	0.626355	0.70915	0.995483	no
XLOC_001388	pepA	gi|110227054|gb|AE004091.2|:4288942-4290855	119.088	73.2256	-0.701611	0.23635	0.995483	no
XLOC_001389	PA3833	gi|110227054|gb|AE004091.2|:4290866-4291235	14.3073	23.6181	0.723142	0.53395	0.995483	no
XLOC_001390	valS	gi|110227054|gb|AE004091.2|:4291355-4294208	68.932	47.843	-0.526866	0.36095	0.995483	no
XLOC_000138	PA0346	gi|110227054|gb|AE004091.2|:389333-389696	33.3994	104	1.63869	0.05435	0.995483	no
XLOC_001391	PA3836	gi|110227054|gb|AE004091.2|:4297249-4298227	223.501	167.883	-0.412827	0.46795	0.995483	no
XLOC_001392	PA3837	gi|110227054|gb|AE004091.2|:4298310-4299201	50.0096	47.8411	-0.0639542	0.91805	0.995483	no
XLOC_001393	PA3838	gi|110227054|gb|AE004091.2|:4299203-4299998	73.1537	93.4759	0.353664	0.564	0.995483	no
XLOC_001394	PA3839	gi|110227054|gb|AE004091.2|:4300116-4301949	87.6934	69.3839	-0.337867	0.5474	0.995483	no
XLOC_001395	PA3840	gi|110227054|gb|AE004091.2|:4302040-4303051	33.7707	26.6383	-0.342273	0.58535	0.995483	no
XLOC_001396	PA3842	gi|110227054|gb|AE004091.2|:4304689-4305040	4.01205	24.1761	2.59117	0.2354	0.995483	no
XLOC_001397	PA3845	gi|110227054|gb|AE004091.2|:4306379-4307808	64.9631	60.9829	-0.0912159	0.9217	0.995483	no
XLOC_001398	PA3847	gi|110227054|gb|AE004091.2|:4307911-4308382	66.4365	58.0917	-0.193644	0.76975	0.995483	no
XLOC_001399	PA3848	gi|110227054|gb|AE004091.2|:4308455-4309811	29.8373	31.5732	0.0815848	0.8935	0.995483	no
XLOC_001400	PA3849	gi|110227054|gb|AE004091.2|:4309903-4318906	82.1001	65.8322	-0.31859	0.47555	0.995483	no
XLOC_000139	PA0349	gi|110227054|gb|AE004091.2|:391093-393225	19.1122	24.0859	0.333697	0.709	0.995483	no
XLOC_001401	PA3859	gi|110227054|gb|AE004091.2|:4309903-4318906	145.329	89.3812	-0.701279	0.5509	0.995483	no
XLOC_001402	rhl	gi|110227054|gb|AE004091.2|:4321433-4322627	237.025	148.509	-0.674487	0.25165	0.995483	no
XLOC_001403	dauB	gi|110227054|gb|AE004091.2|:4322787-4323735	20.7024	10.8271	-0.935145	0.2178	0.995483	no
XLOC_001404	dauA	gi|110227054|gb|AE004091.2|:4323757-4324885	26.9332	14.557	-0.887668	0.18605	0.995483	no
XLOC_001405	dauR	gi|110227054|gb|AE004091.2|:4324947-4325580	56.5729	37.2928	-0.601215	0.365	0.995483	no
XLOC_001406	PA3865a	gi|110227054|gb|AE004091.2|:4325603-4329991	342.648	162.427	-1.07694	0.39515	0.995483	no
XLOC_001407	PA3867	gi|110227054|gb|AE004091.2|:4330320-4330896	41.3609	22.3432	-0.888433	0.2397	0.995483	no
XLOC_001408	PA3868	gi|110227054|gb|AE004091.2|:4331451-4332462	11.0122	18.73	0.766252	0.30465	0.995483	no
XLOC_001409	PA3869	gi|110227054|gb|AE004091.2|:4332652-4333036	32.8017	27.1572	-0.272435	0.76995	0.995483	no
XLOC_001410	narL	gi|110227054|gb|AE004091.2|:4345009-4347534	154.494	182.179	0.237808	0.7548	0.995483	no
XLOC_000139	PA0348	gi|110227054|gb|AE004091.2|:391093-393225	13.2999	27.5427	1.05025	0.24565	0.995483	no
XLOC_001410	narX	gi|110227054|gb|AE004091.2|:4345009-4347534	35.2449	37.6942	0.0969293	0.9074	0.995483	no
XLOC_001411	PA3880	gi|110227054|gb|AE004091.2|:4347618-4348014	126.118	44.2367	-1.51145	0.04975	0.995483	no
XLOC_001412	PA3881	gi|110227054|gb|AE004091.2|:4348185-4348650	58.8979	37.9094	-0.635661	0.38325	0.995483	no
XLOC_001413	PA3882	gi|110227054|gb|AE004091.2|:4348665-4349415	22.7761	21.4412	-0.0871345	0.90385	0.995483	no
XLOC_001414	PA3883	gi|110227054|gb|AE004091.2|:4349501-4350332	20.7821	20.8401	0.00402018	0.96905	0.995483	no
XLOC_001415	PA3884	gi|110227054|gb|AE004091.2|:4350352-4350739	16.1332	17.8192	0.143403	0.90495	0.995483	no
XLOC_001416	tpbA	gi|110227054|gb|AE004091.2|:4350833-4351490	16.989	8.83695	-0.942985	0.30675	0.995483	no
XLOC_001417	PA3886	gi|110227054|gb|AE004091.2|:4351594-4352494	43.406	34.2168	-0.34319	0.5915	0.995483	no
XLOC_001418	PA3886a	gi|110227054|gb|AE004091.2|:4352523-4352769	37.5477	64.5115	0.780833	0.5385	0.995483	no
XLOC_001419	PA3889	gi|110227054|gb|AE004091.2|:4354543-4356863	8.90214	16.9628	0.930154	0.4065	0.995483	no
XLOC_000140	folA	gi|110227054|gb|AE004091.2|:393307-393814	93.7018	83.0331	-0.174391	0.78105	0.995483	no
XLOC_001419	PA3888	gi|110227054|gb|AE004091.2|:4354543-4356863	12.5501	9.66062	-0.377506	0.79685	0.995483	no
XLOC_001419	PA3890	gi|110227054|gb|AE004091.2|:4354543-4356863	20.6367	14.5387	-0.505319	0.65755	0.995483	no
XLOC_001420	PA3891	gi|110227054|gb|AE004091.2|:4356875-4358039	22.2206	38.1914	0.781351	0.23245	0.995483	no
XLOC_001421	PA3895	gi|110227054|gb|AE004091.2|:4363229-4364183	21.3268	27.7485	0.379739	0.5646	0.995483	no
XLOC_001422	PA3896	gi|110227054|gb|AE004091.2|:4364277-4365255	30.6166	31.234	0.0288043	0.9635	0.995483	no
XLOC_001423	PA3898	gi|110227054|gb|AE004091.2|:4366300-4367182	61.1566	43.5236	-0.49071	0.4305	0.995483	no
XLOC_001424	PA3900	gi|110227054|gb|AE004091.2|:4367282-4368742	5.52918	6.71334	0.279966	0.7902	0.995483	no
XLOC_001424	PA3899	gi|110227054|gb|AE004091.2|:4367282-4368742	0	10.8207	inf	0.10515	0.995483	no
XLOC_001425	fecA	gi|110227054|gb|AE004091.2|:4368836-4371191	7.16564	9.89231	0.465212	0.4916	0.995483	no
XLOC_001426	prfC	gi|110227054|gb|AE004091.2|:4371968-4373552	73.0134	49.836	-0.550975	0.3392	0.995483	no
XLOC_000141	PA0356	gi|110227054|gb|AE004091.2|:400247-401072	76.3005	52.8676	-0.529309	0.3954	0.995483	no
XLOC_001427	PA3908	gi|110227054|gb|AE004091.2|:4373937-4401298	0	2.28698	inf	1	1	no
XLOC_001427	PA3906	gi|110227054|gb|AE004091.2|:4373937-4401298	0.593899	0	#NAME?	1	1	no
XLOC_001427	PA3905	gi|110227054|gb|AE004091.2|:4373937-4401298	9.16807	0	#NAME?	0.10725	0.995483	no
XLOC_001427	PA3907	gi|110227054|gb|AE004091.2|:4373937-4401298	24.3674	24.1728	-0.0115676	0.9804	0.995483	no
XLOC_001427	PA3904	gi|110227054|gb|AE004091.2|:4373937-4401298	134.154	62.7991	-1.09507	0.7072	0.995483	no
XLOC_001428	PA3920	gi|110227054|gb|AE004091.2|:4373937-4401298	13.3558	16.3059	0.287922	0.87975	0.995483	no
XLOC_001429	PA3925	gi|110227054|gb|AE004091.2|:4373937-4401298	61.5727	40.8381	-0.592375	0.76955	0.995483	no
XLOC_001430	PA3927	gi|110227054|gb|AE004091.2|:4402637-4403426	29.3587	25.7517	-0.189119	0.77375	0.995483	no
XLOC_001431	PA3933	gi|110227054|gb|AE004091.2|:4406737-4413029	2.76266	4.38935	0.667952	1	1	no
XLOC_001431	PA3932	gi|110227054|gb|AE004091.2|:4406737-4413029	0	0.336343	inf	1	1	no
XLOC_000002	dnaN	gi|110227054|gb|AE004091.2|:2055-3159	304.158	212.178	-0.519545	0.3658	0.995483	no
XLOC_000017	trpI	gi|110227054|gb|AE004091.2|:39201-40089	38.9705	30.8885	-0.335314	0.6114	0.995483	no
XLOC_000142	mutM	gi|110227054|gb|AE004091.2|:401130-401943	279.115	185.34	-0.590681	0.30355	0.995483	no
XLOC_001431	PA3931	gi|110227054|gb|AE004091.2|:4406737-4413029	14.6144	14.4665	-0.0146699	0.98515	0.995483	no
XLOC_001432	PA3940	gi|110227054|gb|AE004091.2|:4417013-4420170	4330.36	1791.36	-1.27343	0.17535	0.995483	no
XLOC_001433	rocA1	gi|110227054|gb|AE004091.2|:4428411-4429041	294.579	153.333	-0.941984	0.10545	0.995483	no
XLOC_001434	PA3949	gi|110227054|gb|AE004091.2|:4429400-4430576	44.5026	47.7598	0.101909	0.86525	0.995483	no
XLOC_001435	PA3953	gi|110227054|gb|AE004091.2|:4433410-4433992	9.39362	11.4375	0.284012	0.78485	0.995483	no
XLOC_001436	PA3954	gi|110227054|gb|AE004091.2|:4434149-4435244	7.31495	10.9416	0.580904	0.49165	0.995483	no
XLOC_001437	PA3955	gi|110227054|gb|AE004091.2|:4435327-4435984	43.126	33.875	-0.34834	0.6009	0.995483	no
XLOC_001438	PA3956	gi|110227054|gb|AE004091.2|:4436050-4436485	79.3134	123.785	0.642198	0.3257	0.995483	no
XLOC_001439	PA3958	gi|110227054|gb|AE004091.2|:4437389-4438529	131.675	103.836	-0.342666	0.54695	0.995483	no
XLOC_001440	PA3959	gi|110227054|gb|AE004091.2|:4438618-4439353	16.7275	18.8904	0.17543	0.8272	0.995483	no
XLOC_000143	PA0358	gi|110227054|gb|AE004091.2|:402019-402598	39.4526	55.8628	0.501768	0.46385	0.995483	no
XLOC_001441	PA3960	gi|110227054|gb|AE004091.2|:4439376-4439784	28.9581	44.9324	0.633791	0.44845	0.995483	no
XLOC_001442	PA3962	gi|110227054|gb|AE004091.2|:4442452-4442869	152.565	87.7306	-0.798271	0.2194	0.995483	no
XLOC_001443	PA3963	gi|110227054|gb|AE004091.2|:4442957-4444530	19.6599	16.9397	-0.214847	0.7817	0.995483	no
XLOC_001444	PA3965	gi|110227054|gb|AE004091.2|:4444977-4445487	69.5891	77.9094	0.162935	0.8028	0.995483	no
XLOC_001445	PA3966	gi|110227054|gb|AE004091.2|:4445688-4445898	338.917	316.457	-0.0989188	0.90915	0.995483	no
XLOC_001446	PA3967	gi|110227054|gb|AE004091.2|:4445998-4446391	124.986	55.2777	-1.177	0.10155	0.995483	no
XLOC_001447	PA3969	gi|110227054|gb|AE004091.2|:4447132-4448742	34.9323	38.4927	0.140022	0.84475	0.995483	no
XLOC_001448	hemL	gi|110227054|gb|AE004091.2|:4455886-4458645	11.4909	24.7361	1.10613	0.6067	0.995483	no
XLOC_001448	thiE	gi|110227054|gb|AE004091.2|:4455886-4458645	14.424	30.5372	1.0821	0.5648	0.995483	no
XLOC_001448	thiD	gi|110227054|gb|AE004091.2|:4455886-4458645	187.106	127.452	-0.553895	0.51165	0.995483	no
XLOC_000144	PA0359	gi|110227054|gb|AE004091.2|:402680-403025	443.247	466.493	0.073746	0.89775	0.995483	no
XLOC_001449	PA3978	gi|110227054|gb|AE004091.2|:4458853-4459402	118.336	71.2061	-0.732816	0.2437	0.995483	no
XLOC_001450	PA3980	gi|110227054|gb|AE004091.2|:4459878-4461219	98.5102	74.9328	-0.394675	0.4857	0.995483	no
XLOC_001451	PA3983	gi|110227054|gb|AE004091.2|:4461387-4463718	298.013	204.958	-0.540047	0.49695	0.995483	no
XLOC_001451	PA3982	gi|110227054|gb|AE004091.2|:4461387-4463718	65.7067	49.735	-0.401779	0.5664	0.995483	no
XLOC_001451	PA3981	gi|110227054|gb|AE004091.2|:4461387-4463718	196.765	149.305	-0.398213	0.6597	0.995483	no
XLOC_001452	lnt	gi|110227054|gb|AE004091.2|:4463903-4465439	55.1749	53.1405	-0.0541991	0.9237	0.995483	no
XLOC_001453	leuS	gi|110227054|gb|AE004091.2|:4466924-4469546	196.879	136.24	-0.531155	0.3745	0.995483	no
XLOC_001454	PA3988	gi|110227054|gb|AE004091.2|:4469612-4470236	307.236	236.404	-0.378092	0.5052	0.995483	no
XLOC_001455	holA	gi|110227054|gb|AE004091.2|:4470273-4471311	51.8593	36.6605	-0.500375	0.42355	0.995483	no
XLOC_001456	PA3990	gi|110227054|gb|AE004091.2|:4471402-4471555	0	0	0	1	1	no
XLOC_000145	PA0360	gi|110227054|gb|AE004091.2|:403294-404281	51.4506	48.0329	-0.0991651	0.87555	0.995483	no
XLOC_001457	PA3992	gi|110227054|gb|AE004091.2|:4472130-4474639	61.6995	57.1586	-0.110289	0.8647	0.995483	no
XLOC_001458	PA3993	gi|110227054|gb|AE004091.2|:4472130-4474639	0	0	0	1	1	no
XLOC_001459	PA3995	gi|110227054|gb|AE004091.2|:4475954-4489633	36.0567	56.3849	0.645039	0.8124	0.995483	no
XLOC_001460	PA4008	gi|110227054|gb|AE004091.2|:4475954-4489633	13.9431	19.795	0.505583	0.8469	0.995483	no
XLOC_001461	PA4010	gi|110227054|gb|AE004091.2|:4490561-4492591	74.5899	62.8302	-0.247521	0.7636	0.995483	no
XLOC_001461	PA4011	gi|110227054|gb|AE004091.2|:4490561-4492591	37.906	36.4002	-0.0584786	0.93795	0.995483	no
XLOC_001462	PA4015	gi|110227054|gb|AE004091.2|:4494480-4494936	384.737	256.276	-0.586176	0.31035	0.995483	no
XLOC_001463	PA4017	gi|110227054|gb|AE004091.2|:4495125-4525154	42.8803	96.6055	1.17179	0.6995	0.995483	no
XLOC_001463	PA4016	gi|110227054|gb|AE004091.2|:4495125-4525154	41.9224	53.0222	0.338877	0.55185	0.995483	no
XLOC_001464	PA4027	gi|110227054|gb|AE004091.2|:4495125-4525154	0	23.3291	inf	0.08895	0.995483	no
XLOC_000146	PA0367	gi|110227054|gb|AE004091.2|:411223-412266	111.997	87.879	-0.349866	0.68995	0.995483	no
XLOC_001464	PA4026	gi|110227054|gb|AE004091.2|:4495125-4525154	186.312	116.619	-0.675915	0.80275	0.995483	no
XLOC_001464	PA4025	gi|110227054|gb|AE004091.2|:4495125-4525154	0	0	0	1	1	no
XLOC_001464	eutB	gi|110227054|gb|AE004091.2|:4495125-4525154	0	0	0	1	1	no
XLOC_001464	PA4023	gi|110227054|gb|AE004091.2|:4495125-4525154	0	0	0	1	1	no
XLOC_001464	PA4022	gi|110227054|gb|AE004091.2|:4495125-4525154	30.0012	27.8295	-0.108403	0.94895	0.995483	no
XLOC_001465	PA4029	gi|110227054|gb|AE004091.2|:4495125-4525154	108.135	64.4195	-0.747265	0.7253	0.995483	no
XLOC_001465	ppa	gi|110227054|gb|AE004091.2|:4495125-4525154	666.404	341.013	-0.966569	0.50125	0.995483	no
XLOC_001465	PA4030	gi|110227054|gb|AE004091.2|:4495125-4525154	0	0	0	1	1	no
XLOC_001466	PA4040	gi|110227054|gb|AE004091.2|:4495125-4525154	15.5475	38.0475	1.29112	0.66105	0.995483	no
XLOC_001466	aqpZ	gi|110227054|gb|AE004091.2|:4495125-4525154	4.49908	6.71581	0.577932	0.8344	0.995483	no
XLOC_000147	ftsX	gi|110227054|gb|AE004091.2|:417526-420569	148.85	190.5	0.355926	0.6843	0.995483	no
XLOC_001466	PA4038	gi|110227054|gb|AE004091.2|:4495125-4525154	0	0	0	1	1	no
XLOC_001466	PA4037	gi|110227054|gb|AE004091.2|:4495125-4525154	0	0	0	1	1	no
XLOC_001466	PA4036	gi|110227054|gb|AE004091.2|:4495125-4525154	0	0	0	1	1	no
XLOC_001466	PA4035	gi|110227054|gb|AE004091.2|:4495125-4525154	37.0166	43.1035	0.219632	0.90415	0.995483	no
XLOC_001466	PA4039	gi|110227054|gb|AE004091.2|:4495125-4525154	0	0	0	1	1	no
XLOC_001466	PA4033	gi|110227054|gb|AE004091.2|:4495125-4525154	27.6738	26.1757	-0.0802928	0.9685	0.995483	no
XLOC_001467	ispA	gi|110227054|gb|AE004091.2|:4525311-4526438	54.5587	51.4808	-0.0837756	0.90765	0.995483	no
XLOC_001467	xseB	gi|110227054|gb|AE004091.2|:4525311-4526438	620.664	400.145	-0.633288	0.53055	0.995483	no
XLOC_001468	dxs	gi|110227054|gb|AE004091.2|:4526546-4540758	113.259	75.1201	-0.592356	0.4138	0.995483	no
XLOC_001469	PA4061	gi|110227054|gb|AE004091.2|:4526546-4540758	69.4244	66.2511	-0.0674978	0.89315	0.995483	no
XLOC_000147	ftsE	gi|110227054|gb|AE004091.2|:417526-420569	179.635	134.788	-0.414372	0.77505	0.995483	no
XLOC_001469	PA4060	gi|110227054|gb|AE004091.2|:4526546-4540758	38.0273	39.8365	0.0670532	0.8718	0.995483	no
XLOC_001470	PA4063	gi|110227054|gb|AE004091.2|:4541271-4541862	22.939	19.7735	-0.214239	0.79225	0.995483	no
XLOC_001471	PA4064	gi|110227054|gb|AE004091.2|:4541950-4542655	9.45472	11.3365	0.261871	0.78955	0.995483	no
XLOC_001472	PA4065	gi|110227054|gb|AE004091.2|:4542657-4543923	27.9	21.2359	-0.393761	0.53655	0.995483	no
XLOC_001473	PA4066	gi|110227054|gb|AE004091.2|:4543940-4544459	22.5353	26.2962	0.222667	0.77505	0.995483	no
XLOC_001474	oprG	gi|110227054|gb|AE004091.2|:4544606-4545305	3259.49	1811.22	-0.847683	0.1808	0.995483	no
XLOC_001475	PA4074	gi|110227054|gb|AE004091.2|:4552858-4554360	14.005	15.7893	0.173008	0.915	0.995483	no
XLOC_001476	PA4079	gi|110227054|gb|AE004091.2|:4554397-4564596	157.573	108.511	-0.538178	0.6597	0.995483	no
XLOC_001476	PA4078	gi|110227054|gb|AE004091.2|:4554397-4564596	0	0	0	1	1	no
XLOC_001476	PA4077	gi|110227054|gb|AE004091.2|:4554397-4564596	19.7885	25.5135	0.3666	0.55015	0.995483	no
XLOC_000147	ftsY	gi|110227054|gb|AE004091.2|:417526-420569	127.284	78.9923	-0.688267	0.50265	0.995483	no
XLOC_001476	PA4076	gi|110227054|gb|AE004091.2|:4554397-4564596	97.5587	49.468	-0.979774	0.52435	0.995483	no
XLOC_001478	hpaC	gi|110227054|gb|AE004091.2|:4568276-4588689	0	4.22648	inf	1	1	no
XLOC_001478	hpaA	gi|110227054|gb|AE004091.2|:4568276-4588689	0	0	0	1	1	no
XLOC_001478	PA4090	gi|110227054|gb|AE004091.2|:4568276-4588689	205.275	155.27	-0.40278	0.39205	0.995483	no
XLOC_001478	PA4089	gi|110227054|gb|AE004091.2|:4568276-4588689	0	0	0	1	1	no
XLOC_001478	PA4088	gi|110227054|gb|AE004091.2|:4568276-4588689	0	0	0	1	1	no
XLOC_001478	PA4087	gi|110227054|gb|AE004091.2|:4568276-4588689	13.1881	12.4981	-0.0775341	0.93695	0.995483	no
XLOC_001479	bfmR	gi|110227054|gb|AE004091.2|:4568276-4588689	35.6615	25.1322	-0.504831	0.62235	0.995483	no
XLOC_001479	PA4095	gi|110227054|gb|AE004091.2|:4568276-4588689	5.20824	8.66914	0.735091	0.48845	0.995483	no
XLOC_001479	bfmS	gi|110227054|gb|AE004091.2|:4568276-4588689	8.23533	2.40168	-1.77778	0.61015	0.995483	no
XLOC_000148	rpoH	gi|110227054|gb|AE004091.2|:420682-421537	2403.84	2271.12	-0.0819403	0.8993	0.995483	no
XLOC_001479	PA4100	gi|110227054|gb|AE004091.2|:4568276-4588689	0	0	0	1	1	no
XLOC_001479	PA4099	gi|110227054|gb|AE004091.2|:4568276-4588689	0.163	0.181558	0.155557	1	1	no
XLOC_001479	PA4098	gi|110227054|gb|AE004091.2|:4568276-4588689	3.7112	6.0702	0.709858	0.7817	0.995483	no
XLOC_001479	PA4097	gi|110227054|gb|AE004091.2|:4568276-4588689	0	0	0	1	1	no
XLOC_001479	PA4096	gi|110227054|gb|AE004091.2|:4568276-4588689	0	0	0	1	1	no
XLOC_001479	PA4104	gi|110227054|gb|AE004091.2|:4568276-4588689	0	0	0	1	1	no
XLOC_001479	PA4103	gi|110227054|gb|AE004091.2|:4568276-4588689	0	0.0448556	inf	1	1	no
XLOC_001480	PA4108	gi|110227054|gb|AE004091.2|:4591186-4593923	70.0174	145.81	1.0583	0.13905	0.995483	no
XLOC_001481	PA4108a	gi|110227054|gb|AE004091.2|:4591186-4593923	41.0808	20.4753	-1.00458	0.6356	0.995483	no
XLOC_001482	ampC	gi|110227054|gb|AE004091.2|:4594028-4595222	11.3724	28.2066	1.31049	0.0656	0.995483	no
XLOC_000149	PA0377	gi|110227054|gb|AE004091.2|:421601-422207	51.5312	52.1766	0.0179572	0.9801	0.995483	no
XLOC_001483	PA4111	gi|110227054|gb|AE004091.2|:4595286-4608384	106.012	150.855	0.508934	0.8076	0.995483	no
XLOC_001484	PA4118	gi|110227054|gb|AE004091.2|:4595286-4608384	0	0.0296821	inf	1	1	no
XLOC_001484	bphP	gi|110227054|gb|AE004091.2|:4595286-4608384	0	0	0	1	1	no
XLOC_001484	bphO	gi|110227054|gb|AE004091.2|:4595286-4608384	0	0	0	1	1	no
XLOC_001484	PA4115	gi|110227054|gb|AE004091.2|:4595286-4608384	100.885	79.0263	-0.352305	0.70915	0.995483	no
XLOC_001485	PA4121	gi|110227054|gb|AE004091.2|:4609566-4610226	5.19307	10.243	0.979978	0.40915	0.995483	no
XLOC_001486	hpcC	gi|110227054|gb|AE004091.2|:4610236-4612473	12.2588	16.888	0.462182	0.51175	0.995483	no
XLOC_001486	PA4122	gi|110227054|gb|AE004091.2|:4610236-4612473	3.0845	12.2029	1.98412	0.2869	0.995483	no
XLOC_001487	hpcB	gi|110227054|gb|AE004091.2|:4612604-4613528	9.8731	16.7767	0.764887	0.32235	0.995483	no
XLOC_001488	hpcD	gi|110227054|gb|AE004091.2|:4613538-4613931	21.8726	13.8194	-0.662425	0.54725	0.995483	no
XLOC_000018	PA0038	gi|110227054|gb|AE004091.2|:40189-40405	1507.06	2477.59	0.7172	0.22635	0.995483	no
XLOC_000150	PA0379	gi|110227054|gb|AE004091.2|:422979-423357	105.175	80.4285	-0.387009	0.57055	0.995483	no
XLOC_001489	PA4128	gi|110227054|gb|AE004091.2|:4614023-4626416	4.0968	113.848	4.79647	0.334	0.995483	no
XLOC_001489	hpcG	gi|110227054|gb|AE004091.2|:4614023-4626416	5.1812	12.9749	1.32436	0.6273	0.995483	no
XLOC_001489	PA4126	gi|110227054|gb|AE004091.2|:4614023-4626416	5.3623	20.0729	1.90433	0.46615	0.995483	no
XLOC_001490	PA4134	gi|110227054|gb|AE004091.2|:4614023-4626416	63.7933	816.678	3.67829	0.33715	0.995483	no
XLOC_001490	PA4133	gi|110227054|gb|AE004091.2|:4614023-4626416	0	99.0739	inf	0.18145	0.995483	no
XLOC_001490	PA4132	gi|110227054|gb|AE004091.2|:4614023-4626416	28.347	6.1853	-2.19628	0.4031	0.995483	no
XLOC_001490	PA4131	gi|110227054|gb|AE004091.2|:4614023-4626416	55.835	387.474	2.79486	0.0104	0.995483	no
XLOC_001491	PA4137	gi|110227054|gb|AE004091.2|:4626661-4627918	6.75318	10.8679	0.686432	0.36765	0.995483	no
XLOC_001492	PA4140	gi|110227054|gb|AE004091.2|:4627946-4632168	0	0	0	1	1	no
XLOC_001492	PA4139	gi|110227054|gb|AE004091.2|:4627946-4632168	139.811	334.167	1.25709	0.32945	0.995483	no
XLOC_000151	PA0380	gi|110227054|gb|AE004091.2|:423459-423660	185.393	194.483	0.0690562	0.917	0.995483	no
XLOC_001494	PA4142	gi|110227054|gb|AE004091.2|:4632872-4634129	2.81383	14.7036	2.38557	0.03365	0.995483	no
XLOC_001495	PA4144	gi|110227054|gb|AE004091.2|:4634138-4637713	2.44493	6.11506	1.32257	0.29535	0.995483	no
XLOC_001495	PA4143	gi|110227054|gb|AE004091.2|:4634138-4637713	4.84906	7.9404	0.711508	0.3623	0.995483	no
XLOC_001496	PA4145	gi|110227054|gb|AE004091.2|:4637808-4650306	27.5919	38.0776	0.464701	0.6789	0.995483	no
XLOC_001497	PA4153	gi|110227054|gb|AE004091.2|:4637808-4650306	3.95413	3.16261	-0.322245	1	1	no
XLOC_001497	acoB	gi|110227054|gb|AE004091.2|:4637808-4650306	0	0	0	1	1	no
XLOC_001497	acoB	gi|110227054|gb|AE004091.2|:4637808-4650306	2.0613	7.2815	1.82068	0.58905	0.995483	no
XLOC_001497	PA4150	gi|110227054|gb|AE004091.2|:4637808-4650306	19.1039	23.3092	0.287034	0.58075	0.995483	no
XLOC_001497	PA4149	gi|110227054|gb|AE004091.2|:4637808-4650306	9.32373	12.1293	0.37952	0.83765	0.995483	no
XLOC_000152	thiG	gi|110227054|gb|AE004091.2|:423718-424516	95.7169	62.57	-0.613303	0.31895	0.995483	no
XLOC_001497	PA4148	gi|110227054|gb|AE004091.2|:4637808-4650306	8.54217	7.65463	-0.158271	0.8984	0.995483	no
XLOC_001499	PA4157	gi|110227054|gb|AE004091.2|:4652713-4653502	47.5814	49.2144	0.0486847	0.9382	0.995483	no
XLOC_001500	fepB	gi|110227054|gb|AE004091.2|:4654431-4657418	5.92115	6.55972	0.147757	0.8588	0.995483	no
XLOC_001500	fepG	gi|110227054|gb|AE004091.2|:4654431-4657418	8.95956	5.27224	-0.765011	0.6009	0.995483	no
XLOC_001500	fepD	gi|110227054|gb|AE004091.2|:4654431-4657418	3.217	0	#NAME?	1	1	no
XLOC_001501	PA4164	gi|110227054|gb|AE004091.2|:4657428-4662643	27.3286	21.8393	-0.32348	0.77905	0.995483	no
XLOC_001501	PA4163	gi|110227054|gb|AE004091.2|:4657428-4662643	24.0639	35.2499	0.55075	0.48915	0.995483	no
XLOC_001502	PA4166	gi|110227054|gb|AE004091.2|:4657428-4662643	9.274	20.6811	1.15705	0.6397	0.995483	no
XLOC_001503	fpvB	gi|110227054|gb|AE004091.2|:4663853-4666262	16.9378	18.2294	0.106014	0.8603	0.995483	no
XLOC_001504	PA4172	gi|110227054|gb|AE004091.2|:4666777-4669290	0	0	0	1	1	no
XLOC_000153	micA	gi|110227054|gb|AE004091.2|:424669-425341	94.8776	69.8902	-0.440976	0.47205	0.995483	no
XLOC_001504	PA4171	gi|110227054|gb|AE004091.2|:4666777-4669290	1.73508	0.683289	-1.34443	1	1	no
XLOC_001504	PA4170	gi|110227054|gb|AE004091.2|:4666777-4669290	61.8517	51.635	-0.260464	0.68295	0.995483	no
XLOC_001505	piv	gi|110227054|gb|AE004091.2|:4669321-4673329	0	0	0	1	1	no
XLOC_001505	PA4174	gi|110227054|gb|AE004091.2|:4669321-4673329	19.4779	23.4135	0.265505	0.75905	0.995483	no
XLOC_001506	PA4177	gi|110227054|gb|AE004091.2|:4673461-4673863	8.94962	6.60663	-0.437911	0.7535	0.995483	no
XLOC_001507	PA4179	gi|110227054|gb|AE004091.2|:4673946-4678206	2.13258	3.15691	0.565913	1	1	no
XLOC_001507	PA4178	gi|110227054|gb|AE004091.2|:4673946-4678206	10.318	8.03403	-0.360964	0.80185	0.995483	no
XLOC_001508	PA4182	gi|110227054|gb|AE004091.2|:4678209-4679595	8.81427	56.4954	2.68022	0.1161	0.995483	no
XLOC_001508	PA4181	gi|110227054|gb|AE004091.2|:4678209-4679595	14.301	29.7177	1.0552	0.1521	0.995483	no
XLOC_001509	PA4185	gi|110227054|gb|AE004091.2|:4681420-4682149	41.7321	20.377	-1.03422	0.1423	0.995483	no
XLOC_000154	PA0383	gi|110227054|gb|AE004091.2|:425503-426850	13.9991	21.2135	0.599653	0.361	0.995483	no
XLOC_001510	PA4186	gi|110227054|gb|AE004091.2|:4682241-4683561	23.3648	26.5509	0.184422	0.7706	0.995483	no
XLOC_001511	PA4187	gi|110227054|gb|AE004091.2|:4683696-4685025	3.68741	9.87744	1.42153	0.11625	0.995483	no
XLOC_001512	PA4189	gi|110227054|gb|AE004091.2|:4685089-4687484	1.84203	8.11732	2.13971	0.0724	0.995483	no
XLOC_001512	PA4188	gi|110227054|gb|AE004091.2|:4685089-4687484	0.836688	4.26456	2.34964	1	1	no
XLOC_001513	pqsL	gi|110227054|gb|AE004091.2|:4687651-4688848	44.7557	30.8325	-0.537616	0.3838	0.995483	no
XLOC_001514	PA4198	gi|110227054|gb|AE004091.2|:4692125-4697903	33.8331	29.2265	-0.211162	0.913	0.995483	no
XLOC_001515	PA4199	gi|110227054|gb|AE004091.2|:4698020-4699802	40.1921	35.0599	-0.197091	0.74045	0.995483	no
XLOC_001516	PA4200	gi|110227054|gb|AE004091.2|:4699999-4703133	16.9748	18.2037	0.100833	0.40445	0.995483	no
XLOC_001517	PA4203	gi|110227054|gb|AE004091.2|:4703204-4704059	35.4844	37.5859	0.0830067	0.8953	0.995483	no
XLOC_001518	ppgL	gi|110227054|gb|AE004091.2|:4704138-4705305	24.6127	32.1352	0.384755	0.547	0.995483	no
XLOC_000155	pilT	gi|110227054|gb|AE004091.2|:436569-437604	193.926	209.834	0.113743	0.84145	0.995483	no
XLOC_001519	mexG	gi|110227054|gb|AE004091.2|:4705955-4706402	24.3256	104.302	2.10021	0.01585	0.995483	no
XLOC_001520	mexH	gi|110227054|gb|AE004091.2|:4706409-4707522	2.60735	44.756	4.10142	0.01995	0.995483	no
XLOC_001521	mexI	gi|110227054|gb|AE004091.2|:4707534-4712084	10.0661	30.6881	1.60817	0.0284	0.995483	no
XLOC_001521	opmD	gi|110227054|gb|AE004091.2|:4707534-4712084	8.46664	43.8582	2.37299	0.0443	0.995483	no
XLOC_001522	phzA1	gi|110227054|gb|AE004091.2|:4713795-4714284	2.07507	13.9182	2.74574	0.23435	0.995483	no
XLOC_001523	phzB1	gi|110227054|gb|AE004091.2|:4714313-4714802	12.4504	247.048	4.31052	0.00385	0.85505	no
XLOC_001524	phzD1	gi|110227054|gb|AE004091.2|:4714825-4718543	0	0	0	1	1	no
XLOC_001524	phzE1	gi|110227054|gb|AE004091.2|:4714825-4718543	0	0	0	1	1	no
XLOC_001524	phzC1	gi|110227054|gb|AE004091.2|:4714825-4718543	1.75318	20.9066	3.57592	0.03975	0.995483	no
XLOC_001525	phzF1	gi|110227054|gb|AE004091.2|:4718556-4719393	0	0	0	1	1	no
XLOC_000156	pilU	gi|110227054|gb|AE004091.2|:437781-438930	144.843	177.95	0.296976	0.59965	0.995483	no
XLOC_001526	phzG1	gi|110227054|gb|AE004091.2|:4719418-4720063	0	0	0	1	1	no
XLOC_001527	phzS	gi|110227054|gb|AE004091.2|:4720300-4721509	9.43396	64.9516	2.78343	0.0007	0.34202	no
XLOC_001528	pchC	gi|110227054|gb|AE004091.2|:4742423-4746551	2.14561	4.24223	0.983436	1	1	no
XLOC_001528	pchB	gi|110227054|gb|AE004091.2|:4742423-4746551	17.2779	40.3083	1.22215	0.59245	0.995483	no
XLOC_001528	pchD	gi|110227054|gb|AE004091.2|:4742423-4746551	2.88124	6.32247	1.1338	0.3919	0.995483	no
XLOC_001528	pchA	gi|110227054|gb|AE004091.2|:4742423-4746551	8.6942	14.5527	0.743159	0.3899	0.995483	no
XLOC_001529	uvrA	gi|110227054|gb|AE004091.2|:4748755-4751593	69.0993	44.0089	-0.650876	0.26035	0.995483	no
XLOC_001531	sbcD	gi|110227054|gb|AE004091.2|:4794403-4795633	42.1621	32.7997	-0.362265	0.558	0.995483	no
XLOC_001532	PA4282	gi|110227054|gb|AE004091.2|:4795641-4799277	42.3253	43.4538	0.0379617	0.9486	0.995483	no
XLOC_001533	PA4288	gi|110227054|gb|AE004091.2|:4810537-4811341	14.8064	18.9762	0.357969	0.6344	0.995483	no
XLOC_000157	PA0398	gi|110227054|gb|AE004091.2|:439990-440395	561.322	252.318	-1.15359	0.0542	0.995483	no
XLOC_001534	PA4289	gi|110227054|gb|AE004091.2|:4811395-4814899	40.8057	28.207	-0.532717	0.79225	0.995483	no
XLOC_001535	PA4291	gi|110227054|gb|AE004091.2|:4811395-4814899	106.646	60.1467	-0.826266	0.70795	0.995483	no
XLOC_001536	PA4292	gi|110227054|gb|AE004091.2|:4815042-4816512	72.0937	40.9899	-0.814607	0.17185	0.995483	no
XLOC_001537	fppA	gi|110227054|gb|AE004091.2|:4819927-4820410	38.1523	34.3408	-0.151844	0.84575	0.995483	no
XLOC_001538	pprB	gi|110227054|gb|AE004091.2|:4820531-4821359	412.892	433.279	0.0695331	0.90455	0.995483	no
XLOC_001539	flp	gi|110227054|gb|AE004091.2|:4830963-4831182	7545.89	4334.54	-0.799814	0.16335	0.995483	no
XLOC_001540	pctC	gi|110227054|gb|AE004091.2|:4831371-4833270	49.659	22.8948	-1.11703	0.06565	0.995483	no
XLOC_001541	pctA	gi|110227054|gb|AE004091.2|:4835263-4837153	97.3868	93.0668	-0.0654596	0.9085	0.995483	no
XLOC_001542	pctB	gi|110227054|gb|AE004091.2|:4837389-4839279	53.7913	79.8573	0.570053	0.31765	0.995483	no
XLOC_001543	PA4311	gi|110227054|gb|AE004091.2|:4839596-4842651	55.2242	110.972	1.00682	0.2913	0.995483	no
XLOC_000158	PA0400	gi|110227054|gb|AE004091.2|:440637-443192	27.1816	32.5787	0.261298	0.76635	0.995483	no
XLOC_001543	PA4312	gi|110227054|gb|AE004091.2|:4839596-4842651	107.19	146.902	0.454684	0.63185	0.995483	no
XLOC_001543	PA4313	gi|110227054|gb|AE004091.2|:4839596-4842651	48.2572	55.9764	0.214076	0.87255	0.995483	no
XLOC_001544	mvaT	gi|110227054|gb|AE004091.2|:4843811-4844186	9927.83	6384.73	-0.636852	0.33125	0.995483	no
XLOC_001545	PA4317	gi|110227054|gb|AE004091.2|:4845937-4846675	168.555	140.893	-0.25862	0.64775	0.995483	no
XLOC_001546	PA4321	gi|110227054|gb|AE004091.2|:4846712-4853645	47.7186	37.8221	-0.33532	0.879	0.995483	no
XLOC_001546	PA4320	gi|110227054|gb|AE004091.2|:4846712-4853645	61.5224	57.6636	-0.0934498	0.9354	0.995483	no
XLOC_001546	PA4319	gi|110227054|gb|AE004091.2|:4846712-4853645	70.9091	46.6718	-0.603418	0.69855	0.995483	no
XLOC_001546	PA4322	gi|110227054|gb|AE004091.2|:4846712-4853645	44.9499	50.1315	0.1574	0.93825	0.995483	no
XLOC_001546	PA4323	gi|110227054|gb|AE004091.2|:4846712-4853645	53.5881	52.839	-0.0203104	0.9874	0.995903	no
XLOC_001546	PA4318	gi|110227054|gb|AE004091.2|:4846712-4853645	56.8319	36.0764	-0.655646	0.3757	0.995483	no
XLOC_000158	PA0399	gi|110227054|gb|AE004091.2|:440637-443192	26.3394	37.1358	0.495588	0.52775	0.995483	no
XLOC_001547	PA4327	gi|110227054|gb|AE004091.2|:4855071-4855878	18.6616	17.2168	-0.116259	0.8764	0.995483	no
XLOC_001548	PA4328	gi|110227054|gb|AE004091.2|:4855962-4856877	100.813	103.337	0.0356882	0.9504	0.995483	no
XLOC_001549	pykA	gi|110227054|gb|AE004091.2|:4856959-4858411	98.7769	76.1358	-0.375599	0.50525	0.995483	no
XLOC_001550	PA4333	gi|110227054|gb|AE004091.2|:4861652-4863176	108.209	75.0694	-0.527528	0.34645	0.995483	no
XLOC_001551	PA4350	gi|110227054|gb|AE004091.2|:4878789-4881178	140.537	188.476	0.423428	0.803	0.995483	no
XLOC_001551	PA4351	gi|110227054|gb|AE004091.2|:4878789-4881178	665.601	706.757	0.086558	0.96395	0.995483	no
XLOC_001552	PA4354	gi|110227054|gb|AE004091.2|:4882052-4882355	302.446	360.199	0.252116	0.6866	0.995483	no
XLOC_001553	PA4355	gi|110227054|gb|AE004091.2|:4882403-4883570	46.1488	44.7099	-0.0456975	0.93955	0.995483	no
XLOC_001554	xenB	gi|110227054|gb|AE004091.2|:4883606-4884659	168.185	132.199	-0.347337	0.539	0.995483	no
XLOC_001555	PA4360a	gi|110227054|gb|AE004091.2|:4888847-4889111	37.611	19.737	-0.930254	0.56295	0.995483	no
XLOC_000019	PA0039	gi|110227054|gb|AE004091.2|:40588-40816	12364.7	12412.9	0.00561756	0.993	0.996764	no
XLOC_000159	pilG	gi|110227054|gb|AE004091.2|:449638-450046	2163.17	1901.6	-0.185929	0.7642	0.995483	no
XLOC_001556	PA4362	gi|110227054|gb|AE004091.2|:4890285-4891344	41.5782	51.0966	0.297401	0.62375	0.995483	no
XLOC_001557	PA4364	gi|110227054|gb|AE004091.2|:4892344-4892746	14.916	41.2914	1.46898	0.1497	0.995483	no
XLOC_001558	PA4365	gi|110227054|gb|AE004091.2|:4892747-4893350	7.41683	18.355	1.30729	0.19695	0.995483	no
XLOC_001559	sodB	gi|110227054|gb|AE004091.2|:4893696-4894278	2447.04	1455.2	-0.749824	0.233	0.995483	no
XLOC_001560	bifA	gi|110227054|gb|AE004091.2|:4894458-4896522	67.246	79.1307	0.234789	0.6896	0.995483	no
XLOC_001561	icmP	gi|110227054|gb|AE004091.2|:4898192-4899533	71.9281	66.6398	-0.11017	0.84825	0.995483	no
XLOC_001562	PA4371	gi|110227054|gb|AE004091.2|:4899695-4901117	14.1108	15.766	0.160018	0.8089	0.995483	no
XLOC_001563	PA4372	gi|110227054|gb|AE004091.2|:4901126-4902191	37.848	29.6654	-0.351434	0.57525	0.995483	no
XLOC_001564	PA4373	gi|110227054|gb|AE004091.2|:4902201-4903296	28.5948	30.1837	0.0780183	0.90045	0.995483	no
XLOC_001565	PA4374	gi|110227054|gb|AE004091.2|:4903465-4904596	58.8057	40.9915	-0.52063	0.3932	0.995483	no
XLOC_000160	pilH	gi|110227054|gb|AE004091.2|:450092-450458	1158.38	1011.55	-0.195543	0.73655	0.995483	no
XLOC_001566	PA4375	gi|110227054|gb|AE004091.2|:4904646-4907703	30.3398	33.7673	0.154415	0.78675	0.995483	no
XLOC_001567	pncB2	gi|110227054|gb|AE004091.2|:4907840-4909037	77.5765	53.8722	-0.526077	0.3767	0.995483	no
XLOC_001568	PA4382	gi|110227054|gb|AE004091.2|:4913040-4913835	35.0737	64.5833	0.880773	0.1737	0.995483	no
XLOC_001569	PA4384	gi|110227054|gb|AE004091.2|:4914738-4915425	4.90325	20.7403	2.08062	0.07875	0.995483	no
XLOC_001570	speA	gi|110227054|gb|AE004091.2|:4919041-4919800	529.239	339.376	-0.641036	0.28745	0.995483	no
XLOC_001571	PA4392	gi|110227054|gb|AE004091.2|:4920980-4922364	19.681	28.9677	0.55764	0.68325	0.995483	no
XLOC_001572	ampG	gi|110227054|gb|AE004091.2|:4922406-4924191	56.9871	34.7803	-0.712365	0.23365	0.995483	no
XLOC_001573	PA4396	gi|110227054|gb|AE004091.2|:4924244-4926999	29.725	39.7281	0.418485	0.59375	0.995483	no
XLOC_001574	panE	gi|110227054|gb|AE004091.2|:4927035-4927947	14.2237	15.1629	0.0922472	0.90245	0.995483	no
XLOC_001575	PA4398	gi|110227054|gb|AE004091.2|:4927997-4930094	30.3754	20.8658	-0.541758	0.36655	0.995483	no
XLOC_000161	pilI	gi|110227054|gb|AE004091.2|:450508-451045	117.26	153.413	0.387708	0.5303	0.995483	no
XLOC_001576	PA4399	gi|110227054|gb|AE004091.2|:4930098-4930677	94.6861	91.3312	-0.0520459	0.9344	0.995483	no
XLOC_001577	PA4405	gi|110227054|gb|AE004091.2|:4937819-4938215	147.65	125.904	-0.229851	0.71815	0.995483	no
XLOC_001579	PA4423	gi|110227054|gb|AE004091.2|:4957708-4959897	56.6622	36.6485	-0.628633	0.32	0.995483	no
XLOC_001579	PA4424	gi|110227054|gb|AE004091.2|:4957708-4959897	125.531	102.874	-0.287172	0.8204	0.995483	no
XLOC_001580	PA4426	gi|110227054|gb|AE004091.2|:4959925-4961094	214.622	131.233	-0.709665	0.4346	0.995483	no
XLOC_001580	PA4425	gi|110227054|gb|AE004091.2|:4959925-4961094	283.778	201.36	-0.494982	0.5028	0.995483	no
XLOC_001581	PA4434	gi|110227054|gb|AE004091.2|:4966189-4967227	68.1986	52.7751	-0.369884	0.54245	0.995483	no
XLOC_001582	PA4436	gi|110227054|gb|AE004091.2|:4968711-4969611	31.4906	38.5541	0.291963	0.64225	0.995483	no
XLOC_001583	PA4437	gi|110227054|gb|AE004091.2|:4969769-4970732	25.7574	20.7881	-0.309231	0.63845	0.995483	no
XLOC_001584	PA4441	gi|110227054|gb|AE004091.2|:4974173-4974620	352.721	234.34	-0.589926	0.32135	0.995483	no
XLOC_000162	pilJ	gi|110227054|gb|AE004091.2|:451129-453178	211.089	196.868	-0.100623	0.869	0.995483	no
XLOC_001585	mltB1	gi|110227054|gb|AE004091.2|:4977868-4979717	69.1269	46.3206	-0.577592	0.4871	0.995483	no
XLOC_001586	algW	gi|110227054|gb|AE004091.2|:4979833-4981003	125.749	73.1261	-0.782084	0.1658	0.995483	no
XLOC_001587	PA4458	gi|110227054|gb|AE004091.2|:4989304-4990824	251.801	208.358	-0.273216	0.8124	0.995483	no
XLOC_001587	PA4457	gi|110227054|gb|AE004091.2|:4989304-4990824	279.824	232.495	-0.267321	0.67825	0.995483	no
XLOC_001588	PA4460	gi|110227054|gb|AE004091.2|:4990832-4992644	529.512	306.978	-0.786525	0.4219	0.995483	no
XLOC_001588	PA4461	gi|110227054|gb|AE004091.2|:4990832-4992644	374.341	246.55	-0.602472	0.5242	0.995483	no
XLOC_001588	PA4459	gi|110227054|gb|AE004091.2|:4990832-4992644	290.271	214.403	-0.437075	0.72225	0.995483	no
XLOC_001589	rpoN	gi|110227054|gb|AE004091.2|:4992869-4994363	112.103	63.7434	-0.814472	0.1639	0.995483	no
XLOC_001590	PA4463	gi|110227054|gb|AE004091.2|:4994440-4994749	25821.7	25905.5	0.00467353	0.99375	0.99681	no
XLOC_001591	ptsN	gi|110227054|gb|AE004091.2|:4994762-4995227	448.53	612.869	0.450373	0.4347	0.995483	no
XLOC_000163	pilK	gi|110227054|gb|AE004091.2|:453238-454114	106.656	125.238	0.231702	0.6847	0.995483	no
XLOC_001592	PA4465	gi|110227054|gb|AE004091.2|:4995228-4996089	321.856	257.153	-0.323788	0.58225	0.995483	no
XLOC_001593	PA4466	gi|110227054|gb|AE004091.2|:4996118-4996391	640.644	496.721	-0.367086	0.54825	0.995483	no
XLOC_001594	PA4473	gi|110227054|gb|AE004091.2|:5001821-5002424	474.677	385.454	-0.300388	0.598	0.995483	no
XLOC_001595	gatC	gi|110227054|gb|AE004091.2|:5013670-5013961	80.6308	39.4745	-1.03041	0.2617	0.995483	no
XLOC_001596	gatA	gi|110227054|gb|AE004091.2|:5013973-5015428	87.1701	76.4929	-0.188508	0.73375	0.995483	no
XLOC_001597	gatB	gi|110227054|gb|AE004091.2|:5015534-5016980	61.5564	38.7933	-0.666102	0.2609	0.995483	no
XLOC_001598	PA4485	gi|110227054|gb|AE004091.2|:5017039-5017417	10.1782	18.7043	0.877888	0.4988	0.995483	no
XLOC_001599	PA4486	gi|110227054|gb|AE004091.2|:5017448-5017835	67.7595	58.8035	-0.20452	0.7784	0.995483	no
XLOC_001600	PA4495	gi|110227054|gb|AE004091.2|:5030524-5031235	381.895	452.124	0.24354	0.6751	0.995483	no
XLOC_001601	PA4496	gi|110227054|gb|AE004091.2|:5031487-5033101	95.8416	71.4976	-0.422756	0.4526	0.995483	no
XLOC_000164	chpA	gi|110227054|gb|AE004091.2|:454125-463071	121.553	160.285	0.399055	0.5447	0.995483	no
XLOC_001602	PA4497	gi|110227054|gb|AE004091.2|:5033193-5034792	19.1194	20.5428	0.1036	0.87475	0.995483	no
XLOC_001603	PA4499	gi|110227054|gb|AE004091.2|:5036244-5036808	110.129	81.2183	-0.439315	0.4767	0.995483	no
XLOC_001604	PA4500	gi|110227054|gb|AE004091.2|:5037073-5038675	48.7558	58.3618	0.259449	0.6485	0.995483	no
XLOC_001605	opdP	gi|110227054|gb|AE004091.2|:5038900-5040355	14.2125	39.0545	1.45833	0.03025	0.995483	no
XLOC_001606	PA4502	gi|110227054|gb|AE004091.2|:5040404-5042000	32.7859	40.6894	0.311579	0.6122	0.995483	no
XLOC_001607	PA4503	gi|110227054|gb|AE004091.2|:5042067-5043078	113.059	94.0664	-0.265318	0.63625	0.995483	no
XLOC_001608	PA4504	gi|110227054|gb|AE004091.2|:5043089-5044001	9.20357	6.15992	-0.579282	0.5558	0.995483	no
XLOC_001609	PA4506	gi|110227054|gb|AE004091.2|:5044053-5045999	34.7125	38.9076	0.164596	0.83035	0.995483	no
XLOC_001609	PA4505	gi|110227054|gb|AE004091.2|:5044053-5045999	27.6621	24.8223	-0.156273	0.8633	0.995483	no
XLOC_001610	PA4508	gi|110227054|gb|AE004091.2|:5046805-5047279	39.4203	22.0071	-0.84097	0.31265	0.995483	no
XLOC_000164	chpB	gi|110227054|gb|AE004091.2|:454125-463071	65.1146	84.3975	0.374221	0.65135	0.995483	no
XLOC_001611	lpxO1	gi|110227054|gb|AE004091.2|:5049768-5050668	155.751	85.3009	-0.868606	0.1402	0.995483	no
XLOC_001612	PA4515	gi|110227054|gb|AE004091.2|:5056094-5056775	22.3417	21.6972	-0.042231	0.9618	0.995483	no
XLOC_001613	PA4516	gi|110227054|gb|AE004091.2|:5056777-5057593	28.0651	25.1761	-0.156725	0.8134	0.995483	no
XLOC_001614	PA4517	gi|110227054|gb|AE004091.2|:5057715-5059518	19.6469	19.1996	-0.0332259	0.9556	0.995483	no
XLOC_001615	nadC	gi|110227054|gb|AE004091.2|:5068031-5068880	126.727	98.2068	-0.367828	0.5157	0.995483	no
XLOC_001616	pilB	gi|110227054|gb|AE004091.2|:5069762-5071463	296.56	177.755	-0.738431	0.2137	0.995483	no
XLOC_001618	coaE	gi|110227054|gb|AE004091.2|:5072694-5074372	190.043	184.468	-0.0429533	0.95925	0.995483	no
XLOC_001618	pilD	gi|110227054|gb|AE004091.2|:5072694-5074372	84.1135	106.248	0.337025	0.6922	0.995483	no
XLOC_001618	coaE	gi|110227054|gb|AE004091.2|:5072694-5074372	185.393	141.442	-0.390375	0.806	0.995483	no
XLOC_001619	PA4536	gi|110227054|gb|AE004091.2|:5076434-5077510	132.165	175.346	0.407866	0.6937	0.995483	no
XLOC_000164	chpC	gi|110227054|gb|AE004091.2|:454125-463071	126.888	145.308	0.195559	0.8212	0.995483	no
XLOC_001619	PA4535	gi|110227054|gb|AE004091.2|:5076434-5077510	155.627	180.714	0.215621	0.75475	0.995483	no
XLOC_001620	PA4537	gi|110227054|gb|AE004091.2|:5077535-5077706	403.136	404.197	0.00379005	0.8895	0.995483	no
XLOC_001621	ndh	gi|110227054|gb|AE004091.2|:5077769-5079077	108.431	70.4488	-0.622129	0.2717	0.995483	no
XLOC_001622	PA4540	gi|110227054|gb|AE004091.2|:5080756-5082394	7.8532	9.64075	0.295865	0.6781	0.995483	no
XLOC_001623	PA4541	gi|110227054|gb|AE004091.2|:5082442-5086696	18.1536	28.0646	0.628494	0.2647	0.995483	no
XLOC_001624	comL	gi|110227054|gb|AE004091.2|:5091960-5092986	265.241	158.573	-0.742154	0.1944	0.995483	no
XLOC_001625	pilS	gi|110227054|gb|AE004091.2|:5093377-5094970	46.938	48.3011	0.0412987	0.9426	0.995483	no
XLOC_001626	pilR	gi|110227054|gb|AE004091.2|:5094984-5096322	50.6918	42.7616	-0.245436	0.67675	0.995483	no
XLOC_001627	fimT	gi|110227054|gb|AE004091.2|:5097596-5098106	7.73213	27.0519	1.80679	0.1203	0.995483	no
XLOC_001628	pilW	gi|110227054|gb|AE004091.2|:5098211-5104939	88.8517	90.8438	0.0319885	0.965	0.995483	no
XLOC_000165	chpD	gi|110227054|gb|AE004091.2|:463078-463873	18.0379	44.7551	1.31102	0.07035	0.995483	no
XLOC_001628	pilY1	gi|110227054|gb|AE004091.2|:5098211-5104939	31.5913	20.4347	-0.628503	0.7154	0.995483	no
XLOC_001628	pilE	gi|110227054|gb|AE004091.2|:5098211-5104939	158.939	97.5193	-0.704713	0.73	0.995483	no
XLOC_001628	pilY2	gi|110227054|gb|AE004091.2|:5098211-5104939	40.8541	32.5769	-0.326632	0.88815	0.995483	no
XLOC_001628	fimU	gi|110227054|gb|AE004091.2|:5098211-5104939	107.098	143.506	0.422174	0.6241	0.995483	no
XLOC_001628	pilV	gi|110227054|gb|AE004091.2|:5098211-5104939	0	0	0	1	1	no
XLOC_001628	pilX	gi|110227054|gb|AE004091.2|:5098211-5104939	0	0	0	1	1	no
XLOC_001629	rpsT	gi|110227054|gb|AE004091.2|:5112662-5112938	11779.6	5133.86	-1.19817	0.05325	0.995483	no
XLOC_001630	ispB	gi|110227054|gb|AE004091.2|:5116864-5117833	243.165	154.479	-0.65452	0.259	0.995483	no
XLOC_001631	PA4570	gi|110227054|gb|AE004091.2|:5117970-5118195	0	38.3165	inf	0.0398	0.995483	no
XLOC_001632	PA4571	gi|110227054|gb|AE004091.2|:5118537-5120565	192.393	129.913	-0.566519	0.3415	0.995483	no
XLOC_000166	chpE	gi|110227054|gb|AE004091.2|:463948-464560	34.817	34.2817	-0.0223544	0.9734	0.995483	no
XLOC_001633	PA4578	gi|110227054|gb|AE004091.2|:5126165-5126654	1485.75	767.82	-0.952353	0.1085	0.995483	no
XLOC_001634	PA4579	gi|110227054|gb|AE004091.2|:5126712-5129117	30.8389	28.5771	-0.109895	0.87995	0.995483	no
XLOC_001636	PA4582	gi|110227054|gb|AE004091.2|:5131427-5132573	13.2095	15.7091	0.250024	0.7182	0.995483	no
XLOC_001637	PA4583	gi|110227054|gb|AE004091.2|:5132628-5133843	11.7225	17.3071	0.562083	0.4166	0.995483	no
XLOC_001638	PA4584	gi|110227054|gb|AE004091.2|:5133879-5135714	34.0384	34.6482	0.0256179	0.9784	0.995483	no
XLOC_001638	rtcA	gi|110227054|gb|AE004091.2|:5133879-5135714	26.6682	34.3303	0.364359	0.6618	0.995483	no
XLOC_001639	PA4586	gi|110227054|gb|AE004091.2|:5135815-5136193	10.1782	9.35215	-0.122112	0.87295	0.995483	no
XLOC_001640	ccpR	gi|110227054|gb|AE004091.2|:5136316-5137357	619.376	342.02	-0.856735	0.1605	0.995483	no
XLOC_001641	PA4596	gi|110227054|gb|AE004091.2|:5149063-5149582	69.4838	67.3182	-0.0456805	0.93965	0.995483	no
XLOC_001642	nfxB	gi|110227054|gb|AE004091.2|:5155560-5156124	88.7605	54.4532	-0.704902	0.2738	0.995483	no
XLOC_000020	PA0040	gi|110227054|gb|AE004091.2|:41112-42801	9.57933	10.4468	0.125059	0.85725	0.995483	no
XLOC_000167	PA0421	gi|110227054|gb|AE004091.2|:468409-469900	125.718	120.712	-0.0586228	0.9159	0.995483	no
XLOC_001643	morA	gi|110227054|gb|AE004091.2|:5156367-5160615	42.6657	26.7678	-0.672577	0.24525	0.995483	no
XLOC_001644	glyA3	gi|110227054|gb|AE004091.2|:5160737-5161991	208.253	133.029	-0.646602	0.26345	0.995483	no
XLOC_001645	PA4608	gi|110227054|gb|AE004091.2|:5166899-5167277	434.27	624.723	0.524626	0.35655	0.995483	no
XLOC_001646	PA4610	gi|110227054|gb|AE004091.2|:5168754-5169189	368.424	692.91	0.911304	0.1254	0.995483	no
XLOC_001647	mscL	gi|110227054|gb|AE004091.2|:5172252-5172666	3623.64	2470.11	-0.552867	0.3711	0.995483	no
XLOC_001648	PA4617	gi|110227054|gb|AE004091.2|:5174979-5176104	30.8809	36.5102	0.241582	0.69935	0.995483	no
XLOC_001649	PA4622	gi|110227054|gb|AE004091.2|:5182578-5183790	10.5816	12.0173	0.183545	0.80335	0.995483	no
XLOC_001650	hprA	gi|110227054|gb|AE004091.2|:5193195-5194167	10.0281	16.6122	0.728203	0.33885	0.995483	no
XLOC_001651	PA4627	gi|110227054|gb|AE004091.2|:5194276-5195275	18.6304	25.7694	0.468	0.4895	0.995483	no
XLOC_001652	lysP	gi|110227054|gb|AE004091.2|:5195369-5196833	32.4555	36.9051	0.185359	0.7616	0.995483	no
XLOC_000168	PA0422	gi|110227054|gb|AE004091.2|:470080-470650	124.495	74.4638	-0.741482	0.2441	0.995483	no
XLOC_001653	PA4629	gi|110227054|gb|AE004091.2|:5197185-5197764	7.89051	13.3007	0.753307	0.4677	0.995483	no
XLOC_001654	PA4630	gi|110227054|gb|AE004091.2|:5197880-5198324	145.309	159.037	0.130235	0.83445	0.995483	no
XLOC_001655	PA4633	gi|110227054|gb|AE004091.2|:5200486-5202625	104.773	184.604	0.817167	0.16935	0.995483	no
XLOC_001656	PA4635	gi|110227054|gb|AE004091.2|:5203667-5204372	17.7276	48.6803	1.45734	0.0541	0.995483	no
XLOC_001657	PA4636	gi|110227054|gb|AE004091.2|:5204927-5206088	71.8239	54.1263	-0.408133	0.48935	0.995483	no
XLOC_001658	mqoB	gi|110227054|gb|AE004091.2|:5208463-5209987	165.232	97.5392	-0.760444	0.1863	0.995483	no
XLOC_001659	upp	gi|110227054|gb|AE004091.2|:5212832-5213471	84.3714	45.217	-0.899888	0.15935	0.995483	no
XLOC_001660	uraA	gi|110227054|gb|AE004091.2|:5213473-5214757	60.9064	58.6006	-0.0556779	0.92155	0.995483	no
XLOC_001661	PA4648	gi|110227054|gb|AE004091.2|:5215090-5215639	164.641	77.9418	-1.07886	0.0889	0.995483	no
XLOC_001662	PA4649	gi|110227054|gb|AE004091.2|:5215669-5216745	14.3423	27.1364	0.919957	0.35235	0.995483	no
XLOC_000169	pasP	gi|110227054|gb|AE004091.2|:470661-471237	1434.9	534.448	-1.42483	0.01605	0.995483	no
XLOC_001662	PA4650	gi|110227054|gb|AE004091.2|:5215669-5216745	12.2171	30.3466	1.31263	0.2061	0.995483	no
XLOC_001663	PA4651	gi|110227054|gb|AE004091.2|:5216763-5217552	88.0761	29.7576	-1.5655	0.0199	0.995483	no
XLOC_001664	PA4653	gi|110227054|gb|AE004091.2|:5217568-5220885	26.2761	20.3009	-0.372208	0.69925	0.995483	no
XLOC_001664	PA4652	gi|110227054|gb|AE004091.2|:5217568-5220885	12.2992	8.40899	-0.548559	0.4915	0.995483	no
XLOC_001665	PA4657	gi|110227054|gb|AE004091.2|:5224889-5225873	176.212	390.033	1.14628	0.0568	0.995483	no
XLOC_001666	PA4658	gi|110227054|gb|AE004091.2|:5226025-5226982	62.1524	70.4348	0.180479	0.76525	0.995483	no
XLOC_001667	phr	gi|110227054|gb|AE004091.2|:5226991-5229333	43.4235	46.3892	0.0953116	0.887	0.995483	no
XLOC_001667	PA4659	gi|110227054|gb|AE004091.2|:5226991-5229333	26.384	33.2529	0.333816	0.78215	0.995483	no
XLOC_001668	PA4667	gi|110227054|gb|AE004091.2|:5234996-5236769	124.29	82.3452	-0.593953	0.3004	0.995483	no
XLOC_001669	PA4668	gi|110227054|gb|AE004091.2|:5236773-5237391	61.4781	45.8624	-0.422763	0.51655	0.995483	no
XLOC_000170	mexA	gi|110227054|gb|AE004091.2|:472023-473175	166.887	119.561	-0.48112	0.38555	0.995483	no
XLOC_001670	ipk	gi|110227054|gb|AE004091.2|:5237392-5238241	698.834	391.268	-0.836792	0.15975	0.995483	no
XLOC_001672	prs	gi|110227054|gb|AE004091.2|:5238407-5239349	468.784	236.477	-0.987224	0.09805	0.995483	no
XLOC_001673	PA4671	gi|110227054|gb|AE004091.2|:5239465-5240080	4563.8	2455.44	-0.894258	0.1775	0.995483	no
XLOC_001674	PA4672	gi|110227054|gb|AE004091.2|:5240121-5240706	55.9189	25.3171	-1.14322	0.11825	0.995483	no
XLOC_001675	PA4673	gi|110227054|gb|AE004091.2|:5240746-5241847	134.092	79.8309	-0.748203	0.1939	0.995483	no
XLOC_001677	PA4675	gi|110227054|gb|AE004091.2|:5243177-5245406	18.7356	15.5084	-0.272735	0.6623	0.995483	no
XLOC_001678	PA4685	gi|110227054|gb|AE004091.2|:5252757-5257584	0	0	0	1	1	no
XLOC_001678	PA4684	gi|110227054|gb|AE004091.2|:5252757-5257584	35.7189	23.3672	-0.612202	0.55075	0.995483	no
XLOC_001678	PA4686	gi|110227054|gb|AE004091.2|:5252757-5257584	27.5905	20.8428	-0.40462	0.58	0.995483	no
XLOC_001679	hitA	gi|110227054|gb|AE004091.2|:5257695-5258703	145.166	122.822	-0.241133	0.66935	0.995483	no
XLOC_000171	mexB	gi|110227054|gb|AE004091.2|:473190-476331	92.8579	59.9678	-0.630837	0.27725	0.995483	no
XLOC_001680	hitB	gi|110227054|gb|AE004091.2|:5258723-5260262	14.2067	9.34193	-0.604779	0.3802	0.995483	no
XLOC_001681	PA4697	gi|110227054|gb|AE004091.2|:5276282-5276735	59.3533	30.4253	-0.964054	0.20715	0.995483	no
XLOC_001682	PA4701	gi|110227054|gb|AE004091.2|:5280504-5282067	73.7049	58.7876	-0.326248	0.5604	0.995483	no
XLOC_001683	PA4702	gi|110227054|gb|AE004091.2|:5282158-5282506	233.419	428.107	0.875052	0.14785	0.995483	no
XLOC_001684	PA4703	gi|110227054|gb|AE004091.2|:5282731-5283004	99.8406	149.456	0.582022	0.44965	0.995483	no
XLOC_001685	cbpA	gi|110227054|gb|AE004091.2|:5283108-5283906	46.8614	45.6592	-0.0374947	0.95235	0.995483	no
XLOC_001688	phuR	gi|110227054|gb|AE004091.2|:5289216-5291511	11.9073	11.6288	-0.0341433	0.9537	0.995483	no
XLOC_001689	PA4711	gi|110227054|gb|AE004091.2|:5291613-5291961	257.989	179.312	-0.524839	0.4009	0.995483	no
XLOC_001690	PA4712	gi|110227054|gb|AE004091.2|:5292041-5292554	24.8861	34.2978	0.46278	0.55065	0.995483	no
XLOC_001691	PA4714	gi|110227054|gb|AE004091.2|:5293256-5293706	937.167	670.596	-0.482861	0.40545	0.995483	no
XLOC_000172	oprM	gi|110227054|gb|AE004091.2|:476332-477790	164.944	163.37	-0.0138314	0.982	0.995483	no
XLOC_001692	PA4716	gi|110227054|gb|AE004091.2|:5295169-5296024	35.4844	36.0413	0.0224652	0.97865	0.995483	no
XLOC_001693	PA4717	gi|110227054|gb|AE004091.2|:5296091-5296985	129.632	145.336	0.164972	0.76845	0.995483	no
XLOC_001694	trmA	gi|110227054|gb|AE004091.2|:5297896-5300280	52.0447	33.6919	-0.627348	0.4592	0.995483	no
XLOC_001694	PA4719	gi|110227054|gb|AE004091.2|:5297896-5300280	53.7254	45.9371	-0.225946	0.7685	0.995483	no
XLOC_001695	dksA	gi|110227054|gb|AE004091.2|:5302385-5302832	2031.19	1312.58	-0.629924	0.3018	0.995483	no
XLOC_001696	PA4724	gi|110227054|gb|AE004091.2|:5302899-5303781	23.589	34.1265	0.532778	0.41675	0.995483	no
XLOC_001697	cbrA	gi|110227054|gb|AE004091.2|:5303850-5306962	42.0702	31.6102	-0.412407	0.4761	0.995483	no
XLOC_001697	PA4724.1	gi|110227054|gb|AE004091.2|:5303850-5306962	292.642	299.052	0.031259	0.7861	0.995483	no
XLOC_001698	cbrB	gi|110227054|gb|AE004091.2|:5306988-5308425	203.801	177.066	-0.20287	0.7218	0.995483	no
XLOC_001701	folK	gi|110227054|gb|AE004091.2|:5309325-5311214	47.7266	38.275	-0.318392	0.8557	0.995483	no
XLOC_000173	PA0433	gi|110227054|gb|AE004091.2|:484403-484838	20.468	19.9194	-0.0391943	0.94	0.995483	no
XLOC_001701	pcnB	gi|110227054|gb|AE004091.2|:5309325-5311214	133.345	81.4088	-0.711911	0.23705	0.995483	no
XLOC_001702	panC	gi|110227054|gb|AE004091.2|:5311463-5313112	59.4142	47.0682	-0.336053	0.6863	0.995483	no
XLOC_001702	panB	gi|110227054|gb|AE004091.2|:5311463-5313112	77.3797	57.7721	-0.421581	0.58335	0.995483	no
XLOC_001703	panD	gi|110227054|gb|AE004091.2|:5313205-5313586	103.401	91.9984	-0.168564	0.8028	0.995483	no
XLOC_001704	pgi	gi|110227054|gb|AE004091.2|:5313675-5315340	170.796	140.336	-0.28339	0.62435	0.995483	no
XLOC_001705	acsB	gi|110227054|gb|AE004091.2|:5315533-5317471	46.1496	43.207	-0.0950536	0.8652	0.995483	no
XLOC_001706	PA4734	gi|110227054|gb|AE004091.2|:5317568-5318450	163.376	107.82	-0.599569	0.2898	0.995483	no
XLOC_001707	PA4736	gi|110227054|gb|AE004091.2|:5318574-5351605	21.0793	0	#NAME?	0.0808	0.995483	no
XLOC_001707	PA4735	gi|110227054|gb|AE004091.2|:5318574-5351605	115.185	90.745	-0.34406	0.8872	0.995483	no
XLOC_001707	PA4737	gi|110227054|gb|AE004091.2|:5318574-5351605	39.3704	66.7481	0.761615	0.75925	0.995483	no
XLOC_000174	PA0434	gi|110227054|gb|AE004091.2|:484963-487156	8.94119	13.0718	0.54792	0.40925	0.995483	no
XLOC_001708	PA4753	gi|110227054|gb|AE004091.2|:5318574-5351605	1361.94	627.595	-1.11775	0.6716	0.995483	no
XLOC_001709	recN	gi|110227054|gb|AE004091.2|:5318574-5351605	65.9918	89.7464	0.443568	0.86045	0.995483	no
XLOC_001710	omlA	gi|110227054|gb|AE004091.2|:5352176-5352707	995.055	540.502	-0.880476	0.1449	0.995483	no
XLOC_001711	smpB	gi|110227054|gb|AE004091.2|:5352774-5372267	348.581	291.572	-0.257641	0.80215	0.995483	no
XLOC_001712	PA4772	gi|110227054|gb|AE004091.2|:5352774-5372267	0	0	0	1	1	no
XLOC_001712	lldD	gi|110227054|gb|AE004091.2|:5352774-5372267	0.473951	0	#NAME?	1	1	no
XLOC_001712	lldP	gi|110227054|gb|AE004091.2|:5352774-5372267	18.3841	33.8507	0.880725	0.52955	0.995483	no
XLOC_001712	PA4773	gi|110227054|gb|AE004091.2|:5352774-5372267	0	0	0	1	1	no
XLOC_001712	PA4774	gi|110227054|gb|AE004091.2|:5352774-5372267	0	0	0	1	1	no
XLOC_001712	PA4775	gi|110227054|gb|AE004091.2|:5352774-5372267	9.96382	7.72219	-0.367688	0.88045	0.995483	no
XLOC_000175	PA0435	gi|110227054|gb|AE004091.2|:487166-488645	2.78903	3.96449	0.507373	1	1	no
XLOC_001712	cueR	gi|110227054|gb|AE004091.2|:5352774-5372267	195.889	104.398	-0.907945	0.73275	0.995483	no
XLOC_001712	pmrA	gi|110227054|gb|AE004091.2|:5352774-5372267	0	6.16167	inf	0.14195	0.995483	no
XLOC_001712	pmrB	gi|110227054|gb|AE004091.2|:5352774-5372267	0	0	0	1	1	no
XLOC_001713	PA4784	gi|110227054|gb|AE004091.2|:5352774-5372267	22.3964	7.5002	-1.57827	0.59035	0.995483	no
XLOC_001714	PA4786	gi|110227054|gb|AE004091.2|:5374122-5375478	21.6063	35.9584	0.734875	0.2461	0.995483	no
XLOC_001715	PA4788	gi|110227054|gb|AE004091.2|:5376851-5377709	5.43413	6.66302	0.294126	0.7729	0.995483	no
XLOC_001716	PA4790	gi|110227054|gb|AE004091.2|:5377790-5378842	19.5224	14.7026	-0.409063	0.5951	0.995483	no
XLOC_001716	PA4789	gi|110227054|gb|AE004091.2|:5377790-5378842	17.2779	3.10064	-2.47829	0.38245	0.995483	no
XLOC_001717	PA4791	gi|110227054|gb|AE004091.2|:5378907-5383812	69.5534	112.647	0.69561	0.4548	0.995483	no
XLOC_001718	PA4796	gi|110227054|gb|AE004091.2|:5378907-5383812	0	0	0	1	1	no
XLOC_000176	PA0436	gi|110227054|gb|AE004091.2|:488729-489350	258.341	155.788	-0.729696	0.20405	0.995483	no
XLOC_001718	PA4795	gi|110227054|gb|AE004091.2|:5378907-5383812	0	0	0	1	1	no
XLOC_001718	PA4794	gi|110227054|gb|AE004091.2|:5378907-5383812	0	0	0	1	1	no
XLOC_001718	PA4793	gi|110227054|gb|AE004091.2|:5378907-5383812	392.012	308.045	-0.347758	0.71935	0.995483	no
XLOC_001719	PA4798	gi|110227054|gb|AE004091.2|:5383946-5384675	13.5347	15.2827	0.175235	0.8346	0.995483	no
XLOC_001720	PA4802	gi|110227054|gb|AE004091.2|:5386999-5387722	6.84548	3.22021	-1.088	0.3746	0.995483	no
XLOC_001721	PA4806	gi|110227054|gb|AE004091.2|:5391835-5392519	27.1361	25.7372	-0.0763619	0.90935	0.995483	no
XLOC_001722	fadH2	gi|110227054|gb|AE004091.2|:5403304-5405350	2.2527	5.31452	1.23828	0.1708	0.995483	no
XLOC_001723	PA4815	gi|110227054|gb|AE004091.2|:5405558-5406008	19.2239	24.0933	0.325728	0.71605	0.995483	no
XLOC_001724	PA4817	gi|110227054|gb|AE004091.2|:5406164-5407870	8.12961	5.68255	-0.516648	0.80485	0.995483	no
XLOC_001724	PA4816	gi|110227054|gb|AE004091.2|:5406164-5407870	19.5231	17.6096	-0.14882	0.82525	0.995483	no
XLOC_000021	PA0041	gi|110227054|gb|AE004091.2|:42913-53521	21.5447	22.7521	0.0786665	0.88915	0.995483	no
XLOC_000177	PA0443	gi|110227054|gb|AE004091.2|:496870-498361	5.52609	10.474	0.922477	0.2274	0.995483	no
XLOC_001725	PA4821	gi|110227054|gb|AE004091.2|:5410875-5420318	16.3767	17.7412	0.115458	0.9439	0.995483	no
XLOC_001727	PA4828	gi|110227054|gb|AE004091.2|:5410875-5420318	16.4217	33.9958	1.04975	0.6699	0.995483	no
XLOC_001728	PA4831	gi|110227054|gb|AE004091.2|:5420322-5423868	54.8109	85.3338	0.638655	0.6219	0.995483	no
XLOC_001728	PA4830	gi|110227054|gb|AE004091.2|:5420322-5423868	33.2498	32.8056	-0.0194033	0.9835	0.995483	no
XLOC_001729	PA4833	gi|110227054|gb|AE004091.2|:5424098-5424716	148.691	143.219	-0.0540947	0.9282	0.995483	no
XLOC_001730	PA4838	gi|110227054|gb|AE004091.2|:5429983-5431138	13.7076	11.6711	-0.232036	0.74155	0.995483	no
XLOC_001731	PA4849	gi|110227054|gb|AE004091.2|:5434655-5456133	0	0	0	1	1	no
XLOC_001731	prmA	gi|110227054|gb|AE004091.2|:5434655-5456133	0	0	0	1	1	no
XLOC_001731	accC	gi|110227054|gb|AE004091.2|:5434655-5456133	142.409	98.9106	-0.525839	0.69085	0.995483	no
XLOC_001731	accB	gi|110227054|gb|AE004091.2|:5434655-5456133	38.7471	40.709	0.0712601	0.9696	0.995483	no
XLOC_000178	PA0444	gi|110227054|gb|AE004091.2|:498419-499703	32.9224	28.6769	-0.19918	0.7524	0.995483	no
XLOC_001731	aroQ1	gi|110227054|gb|AE004091.2|:5434655-5456133	160.13	94.3917	-0.762509	0.7866	0.995483	no
XLOC_001731	dipZ	gi|110227054|gb|AE004091.2|:5434655-5456133	0	0	0	1	1	no
XLOC_001731	PA4844	gi|110227054|gb|AE004091.2|:5434655-5456133	0	0	0	1	1	no
XLOC_001731	PA4843	gi|110227054|gb|AE004091.2|:5434655-5456133	398.727	387.74	-0.0403146	0.97745	0.995483	no
XLOC_001731	PA4851	gi|110227054|gb|AE004091.2|:5434655-5456133	13.986	4.14545	-1.75439	0.52575	0.995483	no
XLOC_001731	PA4852	gi|110227054|gb|AE004091.2|:5434655-5456133	63.9163	102.251	0.677865	0.80015	0.995483	no
XLOC_001731	fis	gi|110227054|gb|AE004091.2|:5434655-5456133	143.131	62.1841	-1.20272	0.65285	0.995483	no
XLOC_001731	purH	gi|110227054|gb|AE004091.2|:5434655-5456133	0	0	0	1	1	no
XLOC_001731	purD	gi|110227054|gb|AE004091.2|:5434655-5456133	0	0	0	1	1	no
XLOC_001731	retS	gi|110227054|gb|AE004091.2|:5434655-5456133	0	0	0	1	1	no
XLOC_000179	PA0448	gi|110227054|gb|AE004091.2|:504120-505029	35.2903	33.7843	-0.0629149	0.9222	0.995483	no
XLOC_001731	PA4857	gi|110227054|gb|AE004091.2|:5434655-5456133	0	0	0	1	1	no
XLOC_001732	PA4858	gi|110227054|gb|AE004091.2|:5456451-5457717	10.044	8.24078	-0.28548	0.7221	0.995483	no
XLOC_001733	PA4861	gi|110227054|gb|AE004091.2|:5457863-5461383	3.62275	6.66302	0.879088	0.5482	0.995483	no
XLOC_001733	PA4860	gi|110227054|gb|AE004091.2|:5457863-5461383	2.70549	7.67409	1.50411	0.236	0.995483	no
XLOC_001733	PA4859	gi|110227054|gb|AE004091.2|:5457863-5461383	2.13816	2.67566	0.323523	1	1	no
XLOC_001734	PA4862	gi|110227054|gb|AE004091.2|:5461519-5462218	3.58843	17.5454	2.28967	0.0868	0.995483	no
XLOC_001735	PA4863	gi|110227054|gb|AE004091.2|:5462301-5462754	71.2239	75.4019	0.0822392	0.9055	0.995483	no
XLOC_001736	ureD	gi|110227054|gb|AE004091.2|:5462762-5463605	18.5385	18.8798	0.0263189	0.9668	0.995483	no
XLOC_001737	ureA	gi|110227054|gb|AE004091.2|:5463606-5463909	83.0245	98.8157	0.251204	0.7519	0.995483	no
XLOC_001738	PA4866	gi|110227054|gb|AE004091.2|:5463917-5464436	7.51176	17.8814	1.25124	0.26	0.995483	no
XLOC_000180	PA0449	gi|110227054|gb|AE004091.2|:505046-505586	665.599	603.351	-0.141657	0.807	0.995483	no
XLOC_001739	ureB	gi|110227054|gb|AE004091.2|:5464452-5464758	23.0372	24.8051	0.10667	0.9054	0.995483	no
XLOC_001740	ureC	gi|110227054|gb|AE004091.2|:5464820-5466521	28.1118	36.272	0.367679	0.5479	0.995483	no
XLOC_001741	PA4869	gi|110227054|gb|AE004091.2|:5466789-5468007	11.6879	20.5748	0.815867	0.23085	0.995483	no
XLOC_001742	PA4871	gi|110227054|gb|AE004091.2|:5468408-5469023	38.8838	34.8461	-0.15817	0.81105	0.995483	no
XLOC_001743	PA4873	gi|110227054|gb|AE004091.2|:5470185-5471451	41.292	25.0393	-0.721667	0.2551	0.995483	no
XLOC_001745	osmE	gi|110227054|gb|AE004091.2|:5472823-5473168	581.239	459.633	-0.338648	0.5562	0.995483	no
XLOC_001746	PA4878	gi|110227054|gb|AE004091.2|:5473765-5474578	111.84	78.6459	-0.507998	0.3929	0.995483	no
XLOC_001747	PA4881	gi|110227054|gb|AE004091.2|:5474579-5479587	622.425	759.437	0.28703	0.828	0.995483	no
XLOC_001747	PA4880	gi|110227054|gb|AE004091.2|:5474579-5479587	318.492	286.146	-0.154503	0.87955	0.995483	no
XLOC_001748	irlR	gi|110227054|gb|AE004091.2|:5480401-5483768	23.9451	21.8325	-0.133257	0.8951	0.995483	no
XLOC_000181	PA0451	gi|110227054|gb|AE004091.2|:507630-509753	61.4687	212.848	1.7919	0.0054	0.960352	no
XLOC_001748	irlR	gi|110227054|gb|AE004091.2|:5480401-5483768	36.5477	32.9825	-0.148079	0.9099	0.995483	no
XLOC_001749	PA4894	gi|110227054|gb|AE004091.2|:5486283-5500326	0	0	0	1	1	no
XLOC_001749	ureG	gi|110227054|gb|AE004091.2|:5486283-5500326	0	0	0	1	1	no
XLOC_001749	ureF	gi|110227054|gb|AE004091.2|:5486283-5500326	0	2.67019	inf	1	1	no
XLOC_001749	ureE	gi|110227054|gb|AE004091.2|:5486283-5500326	17.448	1.98588	-3.13522	0.52085	0.995483	no
XLOC_001749	desT	gi|110227054|gb|AE004091.2|:5486283-5500326	61.0758	54.9323	-0.152945	0.8952	0.995483	no
XLOC_001750	PA4897	gi|110227054|gb|AE004091.2|:5486283-5500326	8.01078	10.519	0.392982	0.8329	0.995483	no
XLOC_001751	PA4902	gi|110227054|gb|AE004091.2|:5500426-5501323	7.693	18.3917	1.25743	0.13075	0.995483	no
XLOC_001752	vanB	gi|110227054|gb|AE004091.2|:5503050-5505784	0.0526974	2.85878	5.76153	1	1	no
XLOC_001752	vanA	gi|110227054|gb|AE004091.2|:5503050-5505784	8.77225	27.6997	1.65885	0.0937	0.995483	no
XLOC_000181	PA0452	gi|110227054|gb|AE004091.2|:507630-509753	24.0505	90.0768	1.90509	0.1773	0.995483	no
XLOC_001755	PA4914	gi|110227054|gb|AE004091.2|:5513731-5514670	17.7317	23.7433	0.421191	0.5356	0.995483	no
XLOC_001756	PA4915	gi|110227054|gb|AE004091.2|:5514726-5516352	77.9439	134.207	0.783951	0.17385	0.995483	no
XLOC_001757	PA4918	gi|110227054|gb|AE004091.2|:5517820-5518480	172.67	99.5034	-0.795196	0.1827	0.995483	no
XLOC_001758	pncB1	gi|110227054|gb|AE004091.2|:5518482-5519682	68.4188	48.9818	-0.482146	0.41785	0.995483	no
XLOC_001759	nadE	gi|110227054|gb|AE004091.2|:5519710-5520538	133.834	66.5757	-1.00738	0.0961	0.995483	no
XLOC_001760	PA4921	gi|110227054|gb|AE004091.2|:5520671-5522973	57.5931	54.9904	-0.0667155	0.97235	0.995483	no
XLOC_001761	PA4923	gi|110227054|gb|AE004091.2|:5520671-5522973	69.3536	49.3796	-0.490055	0.84285	0.995483	no
XLOC_001762	PA4929	gi|110227054|gb|AE004091.2|:5530972-5556247	43.5158	27.7171	-0.650764	0.8038	0.995483	no
XLOC_001765	PA4950	gi|110227054|gb|AE004091.2|:5530972-5556247	73.8953	61.7407	-0.259261	0.9131	0.995483	no
XLOC_001766	PA4952	gi|110227054|gb|AE004091.2|:5556934-5557954	151.02	119.385	-0.339117	0.5519	0.995483	no
XLOC_000182	PA0451a	gi|110227054|gb|AE004091.2|:509860-517462	37.0097	53.2053	0.523666	0.83225	0.995483	no
XLOC_001767	PA4955	gi|110227054|gb|AE004091.2|:5560012-5561524	44.8587	38.6502	-0.214912	0.72445	0.995483	no
XLOC_001768	rhdA	gi|110227054|gb|AE004091.2|:5561598-5562414	67.7435	48.7103	-0.475855	0.4459	0.995483	no
XLOC_001769	psd	gi|110227054|gb|AE004091.2|:5562417-5563287	104.948	77.5241	-0.436957	0.45765	0.995483	no
XLOC_001770	PA4958	gi|110227054|gb|AE004091.2|:5563964-5565428	55.5035	67.1245	0.27426	0.63245	0.995483	no
XLOC_001771	fimX	gi|110227054|gb|AE004091.2|:5565492-5567568	143.447	117.397	-0.289118	0.6181	0.995483	no
XLOC_001772	PA4962	gi|110227054|gb|AE004091.2|:5569089-5571161	17.7667	13.9466	-0.349258	0.73255	0.995483	no
XLOC_001772	PA4961	gi|110227054|gb|AE004091.2|:5569089-5571161	147.838	94.6817	-0.642864	0.2694	0.995483	no
XLOC_001773	PA4972	gi|110227054|gb|AE004091.2|:5580961-5581708	104.694	59.1309	-0.824192	0.18325	0.995483	no
XLOC_001774	PA4974	gi|110227054|gb|AE004091.2|:5584100-5585549	101.395	89.8498	-0.174399	0.75745	0.995483	no
XLOC_001775	PA4986	gi|110227054|gb|AE004091.2|:5601148-5603095	39.7899	93.5211	1.23289	0.0416	0.995483	no
XLOC_000183	PA0457	gi|110227054|gb|AE004091.2|:509860-517462	0	0	0	1	1	no
XLOC_001776	PA4987	gi|110227054|gb|AE004091.2|:5603172-5603772	20.9241	24.3752	0.220246	0.77865	0.995483	no
XLOC_001777	PA4990	gi|110227054|gb|AE004091.2|:5606102-5606435	18.2693	17.4156	-0.0690408	0.9004	0.995483	no
XLOC_001778	PA4992	gi|110227054|gb|AE004091.2|:5606495-5608480	38.901	24.7487	-0.652454	0.54235	0.995483	no
XLOC_001778	PA4991	gi|110227054|gb|AE004091.2|:5606495-5608480	48.7699	26.6486	-0.871933	0.22775	0.995483	no
XLOC_001779	PA4993	gi|110227054|gb|AE004091.2|:5608648-5609569	16.5239	21.5257	0.381505	0.5813	0.995483	no
XLOC_001780	waaL	gi|110227054|gb|AE004091.2|:5615651-5617515	19.1384	0.35713	-5.74388	0.2355	0.995483	no
XLOC_001780	PA4998	gi|110227054|gb|AE004091.2|:5615651-5617515	140.382	103.165	-0.444405	0.5406	0.995483	no
XLOC_001781	aceE	gi|110227054|gb|AE004091.2|:5636155-5638804	154.455	107.516	-0.522639	0.38105	0.995483	no
XLOC_001782	aceF	gi|110227054|gb|AE004091.2|:5638948-5640592	115.661	86.6412	-0.416778	0.46575	0.995483	no
XLOC_001783	PA5017	gi|110227054|gb|AE004091.2|:5641009-5643709	62.4677	62.6807	0.00491067	0.9907	0.996	no
XLOC_000183	PA0456	gi|110227054|gb|AE004091.2|:509860-517462	23917.3	9702.09	-1.30169	0.26775	0.995483	no
XLOC_001784	msrA	gi|110227054|gb|AE004091.2|:5643802-5644450	169.328	181.016	0.0962918	0.8661	0.995483	no
XLOC_001785	PA5020	gi|110227054|gb|AE004091.2|:5645592-5647395	15.5693	18.5667	0.254014	0.6875	0.995483	no
XLOC_001786	PA5021	gi|110227054|gb|AE004091.2|:5647813-5649430	37.7519	24.1003	-0.647496	0.29835	0.995483	no
XLOC_001787	PA5022	gi|110227054|gb|AE004091.2|:5649521-5652878	36.8557	27.8808	-0.402614	0.47415	0.995483	no
XLOC_001788	PA5023	gi|110227054|gb|AE004091.2|:5652944-5654405	19.8026	23.8576	0.268758	0.67035	0.995483	no
XLOC_001789	PA5024	gi|110227054|gb|AE004091.2|:5654555-5655527	23.9131	33.2244	0.474447	0.4657	0.995483	no
XLOC_001790	metY	gi|110227054|gb|AE004091.2|:5655647-5656925	32.0026	24.1345	-0.407093	0.5213	0.995483	no
XLOC_001791	PA5026	gi|110227054|gb|AE004091.2|:5657015-5657468	68.8498	46.2994	-0.572458	0.4015	0.995483	no
XLOC_001792	PA5027	gi|110227054|gb|AE004091.2|:5657580-5661673	231.295	380.378	0.717697	0.4914	0.995483	no
XLOC_001793	PA5030	gi|110227054|gb|AE004091.2|:5657580-5661673	42.0635	28.4371	-0.564792	0.6675	0.995483	no
XLOC_000184	PA0459	gi|110227054|gb|AE004091.2|:518082-520635	78.9945	59.2562	-0.414787	0.4714	0.995483	no
XLOC_001794	PA5032	gi|110227054|gb|AE004091.2|:5662741-5663815	8.85342	10.0446	0.182108	0.821	0.995483	no
XLOC_001795	PA5033	gi|110227054|gb|AE004091.2|:5663888-5689715	18.2991	23.7681	0.37725	0.8752	0.995483	no
XLOC_001796	ponA	gi|110227054|gb|AE004091.2|:5663888-5689715	136.102	154.064	0.178843	0.7948	0.995483	no
XLOC_001797	priA	gi|110227054|gb|AE004091.2|:5663888-5689715	21.1716	17.5873	-0.267594	0.91085	0.995483	no
XLOC_001798	argS	gi|110227054|gb|AE004091.2|:5689963-5691727	178.961	152.662	-0.229302	0.6865	0.995483	no
XLOC_001799	PA5052	gi|110227054|gb|AE004091.2|:5691761-5692457	71.002	55.6679	-0.351014	0.57635	0.995483	no
XLOC_001800	hslV	gi|110227054|gb|AE004091.2|:5692575-5693109	311.944	337.698	0.114444	0.8342	0.995483	no
XLOC_001801	hslU	gi|110227054|gb|AE004091.2|:5693137-5694481	116.446	123.183	0.0811434	0.8851	0.995483	no
XLOC_001802	PA5055	gi|110227054|gb|AE004091.2|:5694575-5694947	154.584	131.545	-0.232844	0.71445	0.995483	no
XLOC_001803	phaC1	gi|110227054|gb|AE004091.2|:5695365-5697045	41.3618	50.7229	0.294338	0.61135	0.995483	no
XLOC_000022	PA0041a	gi|110227054|gb|AE004091.2|:54120-54822	8.32264	10.0622	0.273834	0.77935	0.995483	no
XLOC_000185	PA0460	gi|110227054|gb|AE004091.2|:520736-521315	201.997	172.909	-0.224326	0.69575	0.995483	no
XLOC_001804	phaD	gi|110227054|gb|AE004091.2|:5697197-5698055	54.3413	58.4295	0.104648	0.86685	0.995483	no
XLOC_001805	phaC2	gi|110227054|gb|AE004091.2|:5698358-5700041	26.45	27.3625	0.0489315	0.936	0.995483	no
XLOC_001806	PA5059	gi|110227054|gb|AE004091.2|:5700096-5700714	24.3053	24.1381	-0.00996062	0.9655	0.995483	no
XLOC_001807	ubiE	gi|110227054|gb|AE004091.2|:5702668-5703439	315.428	190.045	-0.730972	0.2014	0.995483	no
XLOC_001808	PA5064	gi|110227054|gb|AE004091.2|:5703453-5705678	69.9681	67.7481	-0.0465154	0.96315	0.995483	no
XLOC_001808	ubiB	gi|110227054|gb|AE004091.2|:5703453-5705678	55.5393	36.1747	-0.618528	0.39295	0.995483	no
XLOC_001809	hisE	gi|110227054|gb|AE004091.2|:5705793-5706526	397.332	296.998	-0.419893	0.70655	0.995483	no
XLOC_001809	hisI	gi|110227054|gb|AE004091.2|:5705793-5706526	640.671	410.22	-0.643187	0.34265	0.995483	no
XLOC_001810	tatA	gi|110227054|gb|AE004091.2|:5706551-5706800	1188.21	712.901	-0.73701	0.23435	0.995483	no
XLOC_001811	tatC	gi|110227054|gb|AE004091.2|:5706813-5708743	110.554	77.021	-0.521433	0.4709	0.995483	no
XLOC_000186	creB	gi|110227054|gb|AE004091.2|:522637-527944	64.5698	34.3295	-0.911411	0.57855	0.995483	no
XLOC_001811	tatB	gi|110227054|gb|AE004091.2|:5706813-5708743	87.8411	66.541	-0.400651	0.77755	0.995483	no
XLOC_001811	tatC	gi|110227054|gb|AE004091.2|:5706813-5708743	48.1675	33.147	-0.53918	0.68225	0.995483	no
XLOC_001812	PA5072	gi|110227054|gb|AE004091.2|:5708954-5710898	16.0115	20.3656	0.347021	0.5783	0.995483	no
XLOC_001813	PA5073	gi|110227054|gb|AE004091.2|:5711007-5720945	203.949	115.016	-0.82637	0.7204	0.995483	no
XLOC_001814	PA5081	gi|110227054|gb|AE004091.2|:5711007-5720945	25.9922	26.611	0.033943	0.95985	0.995483	no
XLOC_001815	PA5085	gi|110227054|gb|AE004091.2|:5723581-5750814	81.8209	83.3627	0.0269338	0.87025	0.995483	no
XLOC_001816	PA5106	gi|110227054|gb|AE004091.2|:5723581-5750814	33.2652	273.68	3.0404	0.2547	0.995483	no
XLOC_001817	PA5116	gi|110227054|gb|AE004091.2|:5762149-5762575	85.1792	109.423	0.361343	0.584	0.995483	no
XLOC_001818	glnA	gi|110227054|gb|AE004091.2|:5766483-5767893	680.612	135.755	-2.32582	0.00065	0.34202	no
XLOC_001819	PA5120	gi|110227054|gb|AE004091.2|:5768040-5776547	70.5326	86.2764	0.290676	0.5895	0.995483	no
XLOC_000186	PA0462	gi|110227054|gb|AE004091.2|:522637-527944	337.799	305.953	-0.142853	0.8883	0.995483	no
XLOC_001820	ntrB	gi|110227054|gb|AE004091.2|:5768040-5776547	58.6993	11.5936	-2.34001	0.4123	0.995483	no
XLOC_001820	PA5122	gi|110227054|gb|AE004091.2|:5768040-5776547	55.3827	40.8306	-0.439786	0.66645	0.995483	no
XLOC_001820	PA5123	gi|110227054|gb|AE004091.2|:5768040-5776547	57.2686	49.7777	-0.202246	0.80945	0.995483	no
XLOC_001820	ntrC	gi|110227054|gb|AE004091.2|:5768040-5776547	6.75986	0	#NAME?	0.2063	0.995483	no
XLOC_001821	PA5127	gi|110227054|gb|AE004091.2|:5768040-5776547	107.704	74.1208	-0.539117	0.3104	0.995483	no
XLOC_001822	pgm	gi|110227054|gb|AE004091.2|:5778133-5779681	66.5892	58.9386	-0.176075	0.7602	0.995483	no
XLOC_001823	PA5132	gi|110227054|gb|AE004091.2|:5779994-5780813	17.3349	14.1614	-0.291719	0.71575	0.995483	no
XLOC_001824	PA5133	gi|110227054|gb|AE004091.2|:5780962-5782249	151.571	80.5096	-0.912761	0.1194	0.995483	no
XLOC_001825	PA5135	gi|110227054|gb|AE004091.2|:5782277-5784361	59.2215	31.7052	-0.901402	0.53165	0.995483	no
XLOC_001825	PA5134	gi|110227054|gb|AE004091.2|:5782277-5784361	106.531	86.9874	-0.292398	0.6403	0.995483	no
XLOC_000186	creC	gi|110227054|gb|AE004091.2|:522637-527944	8.23602	0	#NAME?	0.22995	0.995483	no
XLOC_001826	PA5136	gi|110227054|gb|AE004091.2|:5784429-5785911	85.3297	70.4033	-0.277405	0.6241	0.995483	no
XLOC_001827	PA5144	gi|110227054|gb|AE004091.2|:5791836-5792235	15.1446	26.8186	0.824437	0.41065	0.995483	no
XLOC_001828	PA5145	gi|110227054|gb|AE004091.2|:5792504-5793611	20.3411	26.4349	0.378042	0.566	0.995483	no
XLOC_001829	mutY	gi|110227054|gb|AE004091.2|:5793704-5797021	77.4906	61.4604	-0.334363	0.73775	0.995483	no
XLOC_001829	PA5146	gi|110227054|gb|AE004091.2|:5793704-5797021	65.3854	50.9263	-0.360557	0.62245	0.995483	no
XLOC_001830	PA5148	gi|110227054|gb|AE004091.2|:5797064-5797337	133.121	79.1237	-0.750553	0.367	0.995483	no
XLOC_001831	PA5149	gi|110227054|gb|AE004091.2|:5797364-5798447	31.6811	30.9749	-0.0325237	0.9569	0.995483	no
XLOC_001833	PA5151	gi|110227054|gb|AE004091.2|:5799588-5800278	21.9286	27.4855	0.325852	0.64805	0.995483	no
XLOC_001834	PA5152	gi|110227054|gb|AE004091.2|:5800526-5801300	398.966	156.177	-1.35308	0.0236	0.995483	no
XLOC_001835	PA5153	gi|110227054|gb|AE004091.2|:5801314-5802067	1566.21	671.451	-1.22193	0.05055	0.995483	no
XLOC_000186	creD	gi|110227054|gb|AE004091.2|:522637-527944	0	0	0	1	1	no
XLOC_001836	PA5155	gi|110227054|gb|AE004091.2|:5802128-5803513	128.344	61.4684	-1.0621	0.1778	0.995483	no
XLOC_001836	PA5154	gi|110227054|gb|AE004091.2|:5802128-5803513	96.274	52.2735	-0.881065	0.3242	0.995483	no
XLOC_001837	PA5156	gi|110227054|gb|AE004091.2|:5803581-5804802	22.1415	19.8528	-0.157412	0.816	0.995483	no
XLOC_001838	PA5157	gi|110227054|gb|AE004091.2|:5805205-5805676	15.5019	23.4839	0.599231	0.51905	0.995483	no
XLOC_001839	PA5158	gi|110227054|gb|AE004091.2|:5805679-5807158	13.4803	22.4655	0.736854	0.2682	0.995483	no
XLOC_001840	PA5159	gi|110227054|gb|AE004091.2|:5807172-5808357	25.9735	17.8325	-0.54253	0.4105	0.995483	no
XLOC_001841	PA5160	gi|110227054|gb|AE004091.2|:5808367-5809897	10.2803	16.7765	0.706553	0.30365	0.995483	no
XLOC_001843	rmlC	gi|110227054|gb|AE004091.2|:5810280-5813667	188.573	154.311	-0.289275	0.83065	0.995483	no
XLOC_001843	rmlA	gi|110227054|gb|AE004091.2|:5810280-5813667	140.66	85.0689	-0.725511	0.5693	0.995483	no
XLOC_001843	rmlD	gi|110227054|gb|AE004091.2|:5810280-5813667	96.6281	91.3605	-0.0808722	0.94685	0.995483	no
XLOC_000186	PA0466	gi|110227054|gb|AE004091.2|:522637-527944	0	0	0	1	1	no
XLOC_001843	rmlB	gi|110227054|gb|AE004091.2|:5810280-5813667	152.453	86.4711	-0.818076	0.4573	0.995483	no
XLOC_001844	PA5166	gi|110227054|gb|AE004091.2|:5813726-5816950	34.0081	38.374	0.174252	0.8555	0.995483	no
XLOC_001844	PA5165	gi|110227054|gb|AE004091.2|:5813726-5816950	53.6557	42.3037	-0.342947	0.62215	0.995483	no
XLOC_001845	PA5167	gi|110227054|gb|AE004091.2|:5817190-5818186	158.584	61.9092	-1.35702	0.026	0.995483	no
XLOC_001846	PA5169	gi|110227054|gb|AE004091.2|:5818201-5820114	35.1172	26.1833	-0.423533	0.57495	0.995483	no
XLOC_001846	PA5168	gi|110227054|gb|AE004091.2|:5818201-5820114	59.3325	55.1622	-0.105143	0.902	0.995483	no
XLOC_001847	arcD	gi|110227054|gb|AE004091.2|:5820909-5822358	2147.38	657.365	-1.70781	0.01285	0.995483	no
XLOC_001848	arcA	gi|110227054|gb|AE004091.2|:5822379-5823636	1054.62	453.894	-1.2163	0.0575	0.995483	no
XLOC_001849	arcB	gi|110227054|gb|AE004091.2|:5823715-5824726	963.934	391.666	-1.29931	0.03975	0.995483	no
XLOC_001850	arcC	gi|110227054|gb|AE004091.2|:5824786-5825719	862.181	379.306	-1.18463	0.0533	0.995483	no
XLOC_000187	PA0469	gi|110227054|gb|AE004091.2|:528998-529856	89.6632	94.3073	0.0728538	0.90245	0.995483	no
XLOC_001851	PA5174	gi|110227054|gb|AE004091.2|:5826134-5828039	125.801	128.951	0.0356845	0.9497	0.995483	no
XLOC_001852	PA5177	gi|110227054|gb|AE004091.2|:5829595-5830261	30.7544	23.1132	-0.412081	0.5766	0.995483	no
XLOC_001853	PA5179	gi|110227054|gb|AE004091.2|:5830923-5831805	20.968	12.3647	-0.761965	0.31275	0.995483	no
XLOC_001854	PA5181	gi|110227054|gb|AE004091.2|:5831901-5835070	8.30448	9.87222	0.249485	0.80955	0.995483	no
XLOC_001854	PA5180	gi|110227054|gb|AE004091.2|:5831901-5835070	15.8218	34.2603	1.11462	0.26205	0.995483	no
XLOC_001855	PA5182	gi|110227054|gb|AE004091.2|:5835081-5835895	235.098	215.532	-0.125362	0.83695	0.995483	no
XLOC_001856	PA5183	gi|110227054|gb|AE004091.2|:5835993-5836401	37.6455	48.1419	0.354815	0.64845	0.995483	no
XLOC_001857	PA5184	gi|110227054|gb|AE004091.2|:5836909-5837892	185.538	151.061	-0.29658	0.63745	0.995483	no
XLOC_001858	PA5189	gi|110227054|gb|AE004091.2|:5842274-5843183	26.8878	23.7918	-0.176488	0.7946	0.995483	no
XLOC_001859	PA5191	gi|110227054|gb|AE004091.2|:5844053-5844410	300.744	177.706	-0.759041	0.22255	0.995483	no
XLOC_000188	PA0473	gi|110227054|gb|AE004091.2|:534195-534945	93.2736	68.6119	-0.44301	0.46675	0.995483	no
XLOC_001860	PA5194	gi|110227054|gb|AE004091.2|:5847130-5847934	110.554	53.0217	-1.0601	0.08515	0.995483	no
XLOC_001861	PA5196	gi|110227054|gb|AE004091.2|:5848576-5849011	84.4304	62.6038	-0.431512	0.5236	0.995483	no
XLOC_001862	rimK	gi|110227054|gb|AE004091.2|:5849142-5850048	30.3779	23.8924	-0.346469	0.609	0.995483	no
XLOC_001863	PA5198	gi|110227054|gb|AE004091.2|:5850238-5851162	83.0986	56.8545	-0.54755	0.3762	0.995483	no
XLOC_001864	PA5201	gi|110227054|gb|AE004091.2|:5853584-5855924	44.9609	35.4188	-0.344154	0.5478	0.995483	no
XLOC_001865	PA5202	gi|110227054|gb|AE004091.2|:5855935-5856325	53.9721	40.3478	-0.419723	0.58925	0.995483	no
XLOC_001866	gshA	gi|110227054|gb|AE004091.2|:5856531-5858115	107.373	82.5713	-0.378914	0.51465	0.995483	no
XLOC_001867	PA5205	gi|110227054|gb|AE004091.2|:5859792-5861621	23.779	33.5407	0.496227	0.7981	0.995483	no
XLOC_001868	PA5209	gi|110227054|gb|AE004091.2|:5863824-5865189	18.3762	23.2074	0.336743	0.60745	0.995483	no
XLOC_001869	PA5210	gi|110227054|gb|AE004091.2|:5865226-5867011	126.721	133.36	0.0736676	0.90045	0.995483	no
XLOC_000189	PA0474	gi|110227054|gb|AE004091.2|:535084-535489	5.87772	4.88357	-0.26732	0.8226	0.995483	no
XLOC_001870	PA5211	gi|110227054|gb|AE004091.2|:5867232-5878717	30.8637	35.7171	0.210702	0.9153	0.995483	no
XLOC_001871	PA5212	gi|110227054|gb|AE004091.2|:5867232-5878717	135.577	368.863	1.44397	0.52385	0.995483	no
XLOC_001872	PA5220	gi|110227054|gb|AE004091.2|:5867232-5878717	3.21882	22.5747	2.8101	0.4768	0.995483	no
XLOC_001872	PA5219	gi|110227054|gb|AE004091.2|:5867232-5878717	16.2583	31.2665	0.94344	0.57945	0.995483	no
XLOC_001873	PA5227	gi|110227054|gb|AE004091.2|:5883663-5884286	726.013	452.786	-0.681167	0.3538	0.995483	no
XLOC_001873	PA5226	gi|110227054|gb|AE004091.2|:5883663-5884286	473.67	426.305	-0.151998	0.86015	0.995483	no
XLOC_001875	PA5228	gi|110227054|gb|AE004091.2|:5884507-5885119	84.1411	111.007	0.399773	0.5157	0.995483	no
XLOC_001876	PA5229	gi|110227054|gb|AE004091.2|:5885485-5885944	178.52	312.801	0.80916	0.1758	0.995483	no
XLOC_001877	PA5234	gi|110227054|gb|AE004091.2|:5891682-5892660	45.9249	36.0059	-0.351044	0.5667	0.995483	no
XLOC_001878	glpT	gi|110227054|gb|AE004091.2|:5892909-5894256	36.8123	24.4545	-0.590092	0.3424	0.995483	no
XLOC_000190	PA0475	gi|110227054|gb|AE004091.2|:535538-536108	16.1682	29.9672	0.890219	0.2815	0.995483	no
XLOC_001879	ppx	gi|110227054|gb|AE004091.2|:5900878-5904596	198.46	136.915	-0.535566	0.6408	0.995483	no
XLOC_001880	PA5244	gi|110227054|gb|AE004091.2|:5905870-5906461	227.861	132.396	-0.783292	0.18765	0.995483	no
XLOC_001881	PA5245	gi|110227054|gb|AE004091.2|:5906625-5907294	416.331	271.289	-0.617897	0.28495	0.995483	no
XLOC_001882	PA5246	gi|110227054|gb|AE004091.2|:5907389-5908330	39.4203	47.682	0.274508	0.8216	0.995483	no
XLOC_001883	PA5252a	gi|110227054|gb|AE004091.2|:5914593-5916101	223.168	394.207	0.820819	0.58565	0.995483	no
XLOC_001884	PA5254	gi|110227054|gb|AE004091.2|:5916226-5916856	44.4648	35.9864	-0.305211	0.65225	0.995483	no
XLOC_001885	argH	gi|110227054|gb|AE004091.2|:5924595-5925990	89.0707	84.283	-0.0797089	0.8864	0.995483	no
XLOC_001886	cyaA	gi|110227054|gb|AE004091.2|:5933687-5947132	0	0	0	1	1	no
XLOC_001886	PA5271	gi|110227054|gb|AE004091.2|:5933687-5947132	1294.48	949.296	-0.447445	0.85655	0.995483	no
XLOC_001886	PA5273	gi|110227054|gb|AE004091.2|:5933687-5947132	0	0	0	1	1	no
XLOC_000023	PA0042	gi|110227054|gb|AE004091.2|:56545-56941	110.737	117.397	0.0842579	0.8956	0.995483	no
XLOC_000191	PA0478	gi|110227054|gb|AE004091.2|:537972-540838	40.9949	24.4074	-0.748128	0.5773	0.995483	no
XLOC_001886	PA5270	gi|110227054|gb|AE004091.2|:5933687-5947132	25.7639	0	#NAME?	0.05265	0.995483	no
XLOC_001886	PA5269	gi|110227054|gb|AE004091.2|:5933687-5947132	382.797	404.234	0.0786111	0.9615	0.995483	no
XLOC_001887	PA5279	gi|110227054|gb|AE004091.2|:5933687-5947132	111.561	80.2926	-0.474495	0.84555	0.995483	no
XLOC_001887	dapF	gi|110227054|gb|AE004091.2|:5933687-5947132	67.7195	55.8795	-0.277253	0.8986	0.995483	no
XLOC_001887	lysA	gi|110227054|gb|AE004091.2|:5933687-5947132	131.394	105.475	-0.316991	0.57895	0.995483	no
XLOC_001887	lppL	gi|110227054|gb|AE004091.2|:5933687-5947132	3329.23	861.701	-1.94993	0.5819	0.995483	no
XLOC_001887	sss	gi|110227054|gb|AE004091.2|:5933687-5947132	0	0	0	1	1	no
XLOC_001887	sss	gi|110227054|gb|AE004091.2|:5933687-5947132	0	0	0	1	1	no
XLOC_001888	PA5283	gi|110227054|gb|AE004091.2|:5947294-5948671	49.5127	41.9228	-0.240065	0.68485	0.995483	no
XLOC_001890	PA5289	gi|110227054|gb|AE004091.2|:5953260-5953521	225.878	143.936	-0.650119	0.3811	0.995483	no
XLOC_000192	PA0481	gi|110227054|gb|AE004091.2|:540838-542122	39.567	30.9056	-0.356429	0.7334	0.995483	no
XLOC_001891	PA5290	gi|110227054|gb|AE004091.2|:5953561-5955055	18.3775	21.422	0.221152	0.7326	0.995483	no
XLOC_001892	PA5291	gi|110227054|gb|AE004091.2|:5955179-5957165	53.2232	44.3207	-0.264075	0.64305	0.995483	no
XLOC_001893	PA5294	gi|110227054|gb|AE004091.2|:5959473-5962528	12.2006	12.8062	0.0698991	0.971	0.995483	no
XLOC_001894	rep	gi|110227054|gb|AE004091.2|:5962715-5964725	71.2252	42.4258	-0.747446	0.18455	0.995483	no
XLOC_001895	poxB	gi|110227054|gb|AE004091.2|:5964858-5966577	12.5197	16.6971	0.415401	0.52245	0.995483	no
XLOC_001896	PA5298	gi|110227054|gb|AE004091.2|:5966705-5967278	224.519	107.202	-1.06651	0.07965	0.995483	no
XLOC_001897	lrp	gi|110227054|gb|AE004091.2|:5977122-5977611	439.915	248.208	-0.825678	0.1481	0.995483	no
XLOC_001898	PA5309	gi|110227054|gb|AE004091.2|:5977788-5979108	32.3921	30.1715	-0.102459	0.8673	0.995483	no
XLOC_001899	PA5310	gi|110227054|gb|AE004091.2|:5979193-5980783	36.3488	31.8647	-0.189948	0.7568	0.995483	no
XLOC_001900	PA5313	gi|110227054|gb|AE004091.2|:5983819-5985154	119.468	80.9848	-0.560896	0.3233	0.995483	no
XLOC_000192	PA0480	gi|110227054|gb|AE004091.2|:540838-542122	10.9925	13.8577	0.334172	0.69965	0.995483	no
XLOC_001901	PA5314	gi|110227054|gb|AE004091.2|:5985218-5985581	359.971	142.745	-1.33444	0.0357	0.995483	no
XLOC_001903	PA5317	gi|110227054|gb|AE004091.2|:5986474-5988055	37.4471	26.1961	-0.5155	0.40175	0.995483	no
XLOC_001904	PA5318	gi|110227054|gb|AE004091.2|:5988080-5988629	49.7354	54.848	0.141164	0.8309	0.995483	no
XLOC_001905	coaC	gi|110227054|gb|AE004091.2|:5989459-5990668	105.542	82.6961	-0.351931	0.5315	0.995483	no
XLOC_001906	dut	gi|110227054|gb|AE004091.2|:5990675-5991131	42.2272	27.4581	-0.620941	0.4399	0.995483	no
XLOC_001907	algC	gi|110227054|gb|AE004091.2|:5991167-5993774	79.1936	76.91	-0.0422135	0.94475	0.995483	no
XLOC_001908	argB	gi|110227054|gb|AE004091.2|:5993790-5994696	131.638	122.807	-0.100178	0.8598	0.995483	no
XLOC_001909	PA5325	gi|110227054|gb|AE004091.2|:5996035-5996986	12.6888	13.4801	0.0872724	0.9094	0.995483	no
XLOC_001910	PA5329	gi|110227054|gb|AE004091.2|:6000316-6001378	194.816	123.837	-0.653666	0.5105	0.995483	no
XLOC_001911	crc	gi|110227054|gb|AE004091.2|:6002120-6002900	324.9	267.302	-0.281525	0.6223	0.995483	no
XLOC_000193	PA0484	gi|110227054|gb|AE004091.2|:542139-545644	0.244985	0	#NAME?	1	1	no
XLOC_001912	PA5335	gi|110227054|gb|AE004091.2|:6004276-6005140	70.8997	69.5865	-0.0269737	0.9631	0.995483	no
XLOC_001913	gmk	gi|110227054|gb|AE004091.2|:6005198-6005810	56.5776	44.8927	-0.333752	0.6111	0.995483	no
XLOC_001914	rpoZ	gi|110227054|gb|AE004091.2|:6005898-6006165	1262.13	1010.1	-0.321372	0.5838	0.995483	no
XLOC_001915	spoT	gi|110227054|gb|AE004091.2|:6006230-6008336	153.652	107.032	-0.521616	0.38865	0.995483	no
XLOC_001916	PA5339	gi|110227054|gb|AE004091.2|:6008397-6008778	843.882	367.994	-1.19736	0.0446	0.995483	no
XLOC_001917	PA5340	gi|110227054|gb|AE004091.2|:6008832-6009564	93.0841	44.3247	-1.07042	0.09555	0.995483	no
XLOC_001918	recG	gi|110227054|gb|AE004091.2|:6012046-6015051	115.264	111.085	-0.0532721	0.9415	0.995483	no
XLOC_001918	oxyR	gi|110227054|gb|AE004091.2|:6012046-6015051	266.537	159.732	-0.738679	0.44075	0.995483	no
XLOC_001919	PA5346	gi|110227054|gb|AE004091.2|:6015140-6016550	243.251	315.924	0.377132	0.5345	0.995483	no
XLOC_001920	glcC	gi|110227054|gb|AE004091.2|:6023906-6024662	56.8587	112.722	0.987319	0.1039	0.995483	no
XLOC_000193	PA0483	gi|110227054|gb|AE004091.2|:542139-545644	179.801	113.785	-0.660082	0.66685	0.995483	no
XLOC_001921	PA5357	gi|110227054|gb|AE004091.2|:6024741-6025278	97.7169	96.6303	-0.0161317	0.98385	0.995483	no
XLOC_001922	ubiA	gi|110227054|gb|AE004091.2|:6025304-6026195	156.927	117.162	-0.421587	0.45805	0.995483	no
XLOC_001923	phoB	gi|110227054|gb|AE004091.2|:6026778-6027468	95.0241	70.7751	-0.425052	0.4905	0.995483	no
XLOC_001924	phoR	gi|110227054|gb|AE004091.2|:6027541-6028873	23.6418	17.3145	-0.449363	0.4967	0.995483	no
XLOC_001925	PA5362	gi|110227054|gb|AE004091.2|:6028975-6030316	102.68	68.7131	-0.579497	0.30835	0.995483	no
XLOC_001926	PA5371	gi|110227054|gb|AE004091.2|:6046913-6047318	852.269	571.377	-0.576865	0.31625	0.995483	no
XLOC_001927	betT1	gi|110227054|gb|AE004091.2|:6051643-6053194	19.3603	9.75964	-0.988201	0.14785	0.995483	no
XLOC_001928	sdaB	gi|110227054|gb|AE004091.2|:6056876-6058253	19.7041	28.4271	0.528775	0.4119	0.995483	no
XLOC_001929	gbdR	gi|110227054|gb|AE004091.2|:6058672-6059776	74.3937	88.9057	0.257096	0.64775	0.995483	no
XLOC_001930	PA5383	gi|110227054|gb|AE004091.2|:6061340-6063347	4.11454	10.1137	1.29751	0.18035	0.995483	no
XLOC_000194	PA0492	gi|110227054|gb|AE004091.2|:551910-552669	166.454	15.6728	-3.40879	0.00085	0.346092	no
XLOC_001931	cdhR	gi|110227054|gb|AE004091.2|:6067004-6069099	24.961	19.9787	-0.321211	0.7309	0.995483	no
XLOC_001932	PA5395	gi|110227054|gb|AE004091.2|:6073537-6074008	15.5019	12.3599	-0.326769	0.74385	0.995483	no
XLOC_001933	PA5396	gi|110227054|gb|AE004091.2|:6074229-6075207	68.122	94.1359	0.466625	0.4206	0.995483	no
XLOC_001934	PA5397	gi|110227054|gb|AE004091.2|:6075333-6075864	19.9011	29.4082	0.563369	0.4934	0.995483	no
XLOC_001935	dgcA	gi|110227054|gb|AE004091.2|:6075879-6077940	20.4298	35.448	0.795027	0.1942	0.995483	no
XLOC_001936	dgcB	gi|110227054|gb|AE004091.2|:6078043-6080005	12.813	25.3414	0.983885	0.1223	0.995483	no
XLOC_001937	PA5405	gi|110227054|gb|AE004091.2|:6080123-6091586	0	0	0	1	1	no
XLOC_001937	PA5404	gi|110227054|gb|AE004091.2|:6080123-6091586	0	0	0	1	1	no
XLOC_001937	PA5403	gi|110227054|gb|AE004091.2|:6080123-6091586	0	0.416961	inf	1	1	no
XLOC_001937	PA5402	gi|110227054|gb|AE004091.2|:6080123-6091586	21.2763	67.0118	1.65517	0.63565	0.995483	no
XLOC_000195	PA0493	gi|110227054|gb|AE004091.2|:552745-552994	308.933	43.0199	-2.84422	0.0336	0.995483	no
XLOC_001937	PA5401	gi|110227054|gb|AE004091.2|:6080123-6091586	0	0	0	1	1	no
XLOC_001937	PA5407	gi|110227054|gb|AE004091.2|:6080123-6091586	74.2739	36.7931	-1.01342	0.69735	0.995483	no
XLOC_001937	PA5400	gi|110227054|gb|AE004091.2|:6080123-6091586	43.5028	37.4713	-0.215323	0.8714	0.995483	no
XLOC_001937	PA5406	gi|110227054|gb|AE004091.2|:6080123-6091586	189.98	43.8229	-2.11609	0.5542	0.995483	no
XLOC_001938	gbcB	gi|110227054|gb|AE004091.2|:6080123-6091586	38.312	44.2256	0.207086	0.67845	0.995483	no
XLOC_001939	glyA1	gi|110227054|gb|AE004091.2|:6094023-6095277	24.268	46.1593	0.927568	0.14595	0.995483	no
XLOC_001940	soxB	gi|110227054|gb|AE004091.2|:6095362-6096613	10.7538	37.2897	1.79394	0.01375	0.995483	no
XLOC_001941	soxA	gi|110227054|gb|AE004091.2|:6096706-6100041	11.377	30.6305	1.42884	0.02535	0.995483	no
XLOC_001941	soxD	gi|110227054|gb|AE004091.2|:6096706-6100041	5.03085	19.0943	1.92427	0.55105	0.995483	no
XLOC_001942	soxG	gi|110227054|gb|AE004091.2|:6100134-6100770	17.8134	25.4636	0.515476	0.50135	0.995483	no
XLOC_000196	PA0494	gi|110227054|gb|AE004091.2|:553004-554381	69.2168	8.32713	-3.05523	0.00085	0.346092	no
XLOC_001943	purU2	gi|110227054|gb|AE004091.2|:6100819-6101677	11.774	29.2148	1.3111	0.08855	0.995483	no
XLOC_001944	fdhA	gi|110227054|gb|AE004091.2|:6101883-6103083	44.026	167.89	1.93108	0.00235	0.637894	no
XLOC_001945	PA5422	gi|110227054|gb|AE004091.2|:6103166-6104123	86.5413	117.243	0.438038	0.44775	0.995483	no
XLOC_001946	adhA	gi|110227054|gb|AE004091.2|:6107110-6108139	576.67	843.353	0.548391	0.36825	0.995483	no
XLOC_001947	aspA	gi|110227054|gb|AE004091.2|:6109259-6110684	147.557	193.972	0.39458	0.4996	0.995483	no
XLOC_001948	PA5433	gi|110227054|gb|AE004091.2|:6113901-6121065	9.82854	9.18132	-0.0982757	0.94485	0.995483	no
XLOC_001948	PA5432	gi|110227054|gb|AE004091.2|:6113901-6121065	42.6759	17.673	-1.27188	0.5665	0.995483	no
XLOC_001949	PA5437	gi|110227054|gb|AE004091.2|:6113901-6121065	54.2221	23.8397	-1.18552	0.71075	0.995483	no
XLOC_001950	PA5440	gi|110227054|gb|AE004091.2|:6121171-6151151	8.22263	0	#NAME?	0.0301	0.995483	no
XLOC_001950	PA5439	gi|110227054|gb|AE004091.2|:6121171-6151151	42.0661	73.1823	0.798836	0.76465	0.995483	no
XLOC_000197	PA0496	gi|110227054|gb|AE004091.2|:554382-556228	37.5053	16.4846	-1.18597	0.20475	0.995483	no
XLOC_001951	PA5444	gi|110227054|gb|AE004091.2|:6121171-6151151	0	0	0	1	1	no
XLOC_001951	PA5445	gi|110227054|gb|AE004091.2|:6121171-6151151	8.18812	0	#NAME?	0.0548	0.995483	no
XLOC_001951	PA5446	gi|110227054|gb|AE004091.2|:6121171-6151151	2607.97	1648.17	-0.662065	0.80505	0.995483	no
XLOC_001951	uvrD	gi|110227054|gb|AE004091.2|:6121171-6151151	448.033	271.327	-0.723569	0.5029	0.995483	no
XLOC_001952	PA5455	gi|110227054|gb|AE004091.2|:6121171-6151151	87.7561	69.6031	-0.334348	0.88725	0.995483	no
XLOC_001952	PA5459	gi|110227054|gb|AE004091.2|:6121171-6151151	0	9.49631	inf	0.0426	0.995483	no
XLOC_001952	PA5458	gi|110227054|gb|AE004091.2|:6121171-6151151	0	0	0	1	1	no
XLOC_001952	PA5457	gi|110227054|gb|AE004091.2|:6121171-6151151	0	11.0442	inf	0.0502	0.995483	no
XLOC_001952	PA5456	gi|110227054|gb|AE004091.2|:6121171-6151151	3.16316	1.32731	-1.25286	1	1	no
XLOC_001953	PA5460	gi|110227054|gb|AE004091.2|:6151313-6151526	622.845	127.239	-2.29133	0.03905	0.995483	no
XLOC_000197	PA0495	gi|110227054|gb|AE004091.2|:554382-556228	44.7548	24.3413	-0.878634	0.30415	0.995483	no
XLOC_001954	PA5461	gi|110227054|gb|AE004091.2|:6151621-6151939	1548.5	659.634	-1.23113	0.0393	0.995483	no
XLOC_001955	PA5462	gi|110227054|gb|AE004091.2|:6152063-6152357	318.734	146.144	-1.12496	0.0941	0.995483	no
XLOC_001956	PA5464	gi|110227054|gb|AE004091.2|:6152385-6154676	42.5578	40.5767	-0.0687713	0.90565	0.995483	no
XLOC_001956	PA5463	gi|110227054|gb|AE004091.2|:6152385-6154676	71.4305	68.1634	-0.0675424	0.9697	0.995483	no
XLOC_001957	PA5467	gi|110227054|gb|AE004091.2|:6155270-6156574	77.9318	50.9802	-0.612275	0.55135	0.995483	no
XLOC_001957	PA5466	gi|110227054|gb|AE004091.2|:6155270-6156574	18.3877	20.3823	0.148574	0.86225	0.995483	no
XLOC_001958	PA5468	gi|110227054|gb|AE004091.2|:6156853-6158158	21.5299	43.4234	1.01213	0.11715	0.995483	no
XLOC_001959	PA5469	gi|110227054|gb|AE004091.2|:6158178-6158943	10.5562	48.3111	2.19427	0.0123	0.995483	no
XLOC_001960	PA5473	gi|110227054|gb|AE004091.2|:6162220-6163969	79.7984	108.944	0.449156	0.43725	0.995483	no
XLOC_001961	PA5474	gi|110227054|gb|AE004091.2|:6164037-6165411	281.122	306.298	0.123739	0.84265	0.995483	no
XLOC_000024	exoT	gi|110227054|gb|AE004091.2|:58785-60159	17.7284	21.0148	0.245342	0.70425	0.995483	no
XLOC_000198	bioB	gi|110227054|gb|AE004091.2|:559643-560702	40.1922	43.2356	0.105302	0.863	0.995483	no
XLOC_001962	PA5477	gi|110227054|gb|AE004091.2|:6167782-6168823	41.7636	40.1431	-0.0570926	0.9285	0.995483	no
XLOC_001963	algB	gi|110227054|gb|AE004091.2|:6173347-6176481	36.2979	36.8444	0.021561	0.97945	0.995483	no
XLOC_001963	algB	gi|110227054|gb|AE004091.2|:6173347-6176481	53.2641	49.3694	-0.109546	0.88925	0.995483	no
XLOC_001964	PA5492	gi|110227054|gb|AE004091.2|:6182872-6183520	154.662	165.242	0.0954659	0.86875	0.995483	no
XLOC_001965	PA5494	gi|110227054|gb|AE004091.2|:6186602-6186893	2237.5	3028.77	0.43684	0.4631	0.995483	no
XLOC_001966	thrB	gi|110227054|gb|AE004091.2|:6186926-6187877	104.683	188.272	0.846794	0.1426	0.995483	no
XLOC_001967	znuB	gi|110227054|gb|AE004091.2|:6192178-6194272	60.7422	77.8275	0.357581	0.7489	0.995483	no
XLOC_001967	znuC	gi|110227054|gb|AE004091.2|:6192178-6194272	62.5493	94.5052	0.5954	0.6191	0.995483	no
XLOC_001967	np20	gi|110227054|gb|AE004091.2|:6192178-6194272	208.989	310.002	0.568854	0.4861	0.995483	no
XLOC_001968	PA5502	gi|110227054|gb|AE004091.2|:6194313-6195102	108.324	90.9894	-0.251575	0.6755	0.995483	no
XLOC_000199	PA0503	gi|110227054|gb|AE004091.2|:560807-563545	18.1214	19.9602	0.139435	0.91265	0.995483	no
XLOC_001969	PA5504	gi|110227054|gb|AE004091.2|:6195308-6196993	87.4334	64.0888	-0.448111	0.58055	0.995483	no
XLOC_001969	PA5503	gi|110227054|gb|AE004091.2|:6195308-6196993	56.0031	30.4967	-0.876856	0.2721	0.995483	no
XLOC_001970	PA5505	gi|110227054|gb|AE004091.2|:6197069-6197852	199.455	115.624	-0.786626	0.17165	0.995483	no
XLOC_001971	PA5506	gi|110227054|gb|AE004091.2|:6198054-6198912	4.52844	26.1395	2.52915	0.0293	0.995483	no
XLOC_001972	PA5508	gi|110227054|gb|AE004091.2|:6198916-6200898	12.609	25.6732	1.02581	0.19855	0.995483	no
XLOC_001972	PA5507	gi|110227054|gb|AE004091.2|:6198916-6200898	18.4177	29.6498	0.686932	0.50275	0.995483	no
XLOC_001973	PA5509	gi|110227054|gb|AE004091.2|:6200965-6201634	16.5514	56.6981	1.77635	0.02585	0.995483	no
XLOC_001974	PA5510	gi|110227054|gb|AE004091.2|:6201735-6203085	20.6851	27.0356	0.386271	0.5458	0.995483	no
XLOC_001975	poxA	gi|110227054|gb|AE004091.2|:6206291-6207170	31.5916	25.8316	-0.290404	0.66995	0.995483	no
XLOC_001976	PA5514	gi|110227054|gb|AE004091.2|:6207240-6208029	13.1608	14.8788	0.177009	0.8277	0.995483	no
XLOC_000199	bioF	gi|110227054|gb|AE004091.2|:560807-563545	35.3683	43.1508	0.286928	0.78905	0.995483	no
XLOC_001977	pdxY	gi|110227054|gb|AE004091.2|:6208574-6209441	106.316	83.939	-0.340941	0.56755	0.995483	no
XLOC_001978	PA5520	gi|110227054|gb|AE004091.2|:6212789-6213533	50.4441	48.9266	-0.044066	0.94375	0.995483	no
XLOC_001979	PA5525	gi|110227054|gb|AE004091.2|:6217312-6218840	72.5616	124.522	0.779124	0.52225	0.995483	no
XLOC_001979	PA5524	gi|110227054|gb|AE004091.2|:6217312-6218840	102.457	169.3	0.724566	0.3359	0.995483	no
XLOC_001980	PA5529	gi|110227054|gb|AE004091.2|:6221100-6222858	94.2121	71.4148	-0.39969	0.48715	0.995483	no
XLOC_001981	PA5530	gi|110227054|gb|AE004091.2|:6223173-6224481	59.0465	13.1138	-2.17076	0.00195	0.632306	no
XLOC_001982	PA5533	gi|110227054|gb|AE004091.2|:6227081-6227450	121.612	131.868	0.116806	0.8588	0.995483	no
XLOC_001983	PA5537	gi|110227054|gb|AE004091.2|:6229974-6231562	113.73	89.2698	-0.349372	0.6349	0.995483	no
XLOC_001984	PA5540	gi|110227054|gb|AE004091.2|:6231661-6233115	8.28747	22.3329	1.43017	0.2361	0.995483	no
XLOC_001984	PA5539	gi|110227054|gb|AE004091.2|:6231661-6233115	5.12866	11.6158	1.17943	0.28605	0.995483	no
XLOC_000199	bioF	gi|110227054|gb|AE004091.2|:560807-563545	19.5157	29.2144	0.58204	0.511	0.995483	no
XLOC_001985	pyrQ	gi|110227054|gb|AE004091.2|:6233117-6234455	16.7231	27.6169	0.723711	0.26905	0.995483	no
XLOC_001986	PA5547	gi|110227054|gb|AE004091.2|:6240869-6241493	114.156	62.6708	-0.865146	0.1715	0.995483	no
XLOC_001987	PA5548	gi|110227054|gb|AE004091.2|:6241850-6243056	30.7521	29.2144	-0.0740058	0.9056	0.995483	no
XLOC_001988	lptA	gi|110227054|gb|AE004091.2|:7017-7791	124.677	98.6383	-0.337973	0.56385	0.995483	no
XLOC_001989	PA0006	gi|110227054|gb|AE004091.2|:7802-8339	110.154	93.6418	-0.234292	0.70275	0.995483	no
XLOC_001990	glyQ	gi|110227054|gb|AE004091.2|:10433-13435	39.8123	28.8724	-0.463524	0.71815	0.995483	no
XLOC_001990	glyS	gi|110227054|gb|AE004091.2|:10433-13435	55.0831	46.5048	-0.244231	0.71165	0.995483	no
XLOC_001991	PA0014	gi|110227054|gb|AE004091.2|:16334-16607	91.5205	79.1237	-0.209985	0.8107	0.995483	no
XLOC_001992	PA0015	gi|110227054|gb|AE004091.2|:16899-17217	361.316	469.57	0.378077	0.5388	0.995483	no
XLOC_001993	trkA	gi|110227054|gb|AE004091.2|:17365-18739	96.2401	75.9988	-0.340661	0.54615	0.995483	no
XLOC_000200	bioD	gi|110227054|gb|AE004091.2|:563548-564235	26.9679	29.7277	0.140567	0.8374	0.995483	no
XLOC_001994	fmt	gi|110227054|gb|AE004091.2|:18766-21012	27.9813	23.0999	-0.276575	0.8228	0.995483	no
XLOC_001994	PA0017	gi|110227054|gb|AE004091.2|:18766-21012	45.7511	41.5886	-0.137617	0.8444	0.995483	no
XLOC_001995	def	gi|110227054|gb|AE004091.2|:21066-21573	946.778	947.232	0.000691432	0.99795	0.998154	no
XLOC_001996	qor	gi|110227054|gb|AE004091.2|:24567-25545	73.4799	62.9019	-0.224246	0.7122	0.995483	no
XLOC_001997	PA0029	gi|110227054|gb|AE004091.2|:30501-32055	11.8538	12.4847	0.074812	0.91635	0.995483	no
XLOC_001998	PA0030	gi|110227054|gb|AE004091.2|:32059-32983	4.93655	11.1845	1.17992	0.22495	0.995483	no
XLOC_001999	betC	gi|110227054|gb|AE004091.2|:32999-34511	13.5935	17.2637	0.344824	0.6067	0.995483	no
XLOC_002000	PA0033	gi|110227054|gb|AE004091.2|:35548-36270	18.2135	34.0521	0.902735	0.5596	0.995483	no
XLOC_002001	PA0034	gi|110227054|gb|AE004091.2|:36277-36901	14.0934	10.3129	-0.450565	0.63585	0.995483	no
XLOC_002002	trpB	gi|110227054|gb|AE004091.2|:37086-39098	136.811	282.319	1.04514	0.0865	0.995483	no
XLOC_000201	PA0505	gi|110227054|gb|AE004091.2|:564343-564574	5204.85	4109.69	-0.340825	0.55725	0.995483	no
XLOC_002002	trpA	gi|110227054|gb|AE004091.2|:37086-39098	1.34028	2.9254	1.12609	1	1	no
XLOC_002003	PA0043	gi|110227054|gb|AE004091.2|:57211-58594	16.5879	15.9986	-0.0521791	0.93435	0.995483	no
XLOC_002004	PA0048	gi|110227054|gb|AE004091.2|:62402-62786	45.9224	54.3144	0.242138	0.75765	0.995483	no
XLOC_002005	PA0049	gi|110227054|gb|AE004091.2|:63067-64729	22.3589	62.9105	1.49245	0.01735	0.995483	no
XLOC_002006	PA0052	gi|110227054|gb|AE004091.2|:68187-68616	39.3973	56.9238	0.530935	0.4707	0.995483	no
XLOC_002007	PA0054	gi|110227054|gb|AE004091.2|:69542-70091	44.5904	22.1316	-1.01062	0.18095	0.995483	no
XLOC_002008	PA0055	gi|110227054|gb|AE004091.2|:70129-70636	165.93	105.976	-0.646834	0.30125	0.995483	no
XLOC_002009	PA0056	gi|110227054|gb|AE004091.2|:70701-71622	4.95718	7.48722	0.594909	0.5278	0.995483	no
XLOC_002010	PA0061	gi|110227054|gb|AE004091.2|:74278-74716	141.445	244.49	0.789533	0.20625	0.995483	no
XLOC_002011	PA0062	gi|110227054|gb|AE004091.2|:74772-75189	24.9652	15.3913	-0.697798	0.4914	0.995483	no
XLOC_000202	PA0506	gi|110227054|gb|AE004091.2|:564913-566719	300.812	140.675	-1.0965	0.0678	0.995483	no
XLOC_002012	PA0064	gi|110227054|gb|AE004091.2|:76415-77399	58.4841	46.4939	-0.331001	0.59125	0.995483	no
XLOC_002013	PA0066	gi|110227054|gb|AE004091.2|:77431-78632	94.2461	98.8712	0.0691173	0.921	0.995483	no
XLOC_002013	PA0065	gi|110227054|gb|AE004091.2|:77431-78632	20.503	23.8354	0.217275	0.8735	0.995483	no
XLOC_002014	PA0073	gi|110227054|gb|AE004091.2|:81115-115045	2.71042	33.8455	3.64238	0.3378	0.995483	no
XLOC_002014	icmF1	gi|110227054|gb|AE004091.2|:81115-115045	0	0	0	1	1	no
XLOC_002014	PA0072	gi|110227054|gb|AE004091.2|:81115-115045	0	0	0	1	1	no
XLOC_002014	PA0071	gi|110227054|gb|AE004091.2|:81115-115045	129.791	90.5854	-0.518846	0.79945	0.995483	no
XLOC_002014	ppkA	gi|110227054|gb|AE004091.2|:81115-115045	0	0	0	1	1	no
XLOC_002014	PA0070	gi|110227054|gb|AE004091.2|:81115-115045	805.367	574.923	-0.486278	0.7198	0.995483	no
XLOC_002014	PA0076	gi|110227054|gb|AE004091.2|:81115-115045	0	0	0	1	1	no
XLOC_000203	PA0507	gi|110227054|gb|AE004091.2|:566931-568728	12.279	12.0712	-0.0246258	0.97855	0.995483	no
XLOC_002014	PA0078	gi|110227054|gb|AE004091.2|:81115-115045	0	0	0	1	1	no
XLOC_002014	pppA	gi|110227054|gb|AE004091.2|:81115-115045	0	0	0	1	1	no
XLOC_002014	PA0079	gi|110227054|gb|AE004091.2|:81115-115045	0	0	0	1	1	no
XLOC_002014	PA0080	gi|110227054|gb|AE004091.2|:81115-115045	0	0	0	1	1	no
XLOC_002014	fha1	gi|110227054|gb|AE004091.2|:81115-115045	8.9401	0	#NAME?	0.0326	0.995483	no
XLOC_002015	PA0094	gi|110227054|gb|AE004091.2|:81115-115045	40.0459	16.5698	-1.2731	0.6281	0.995483	no
XLOC_002015	PA0093	gi|110227054|gb|AE004091.2|:81115-115045	62.5161	60.5869	-0.0452214	0.9342	0.995483	no
XLOC_002015	PA0092	gi|110227054|gb|AE004091.2|:81115-115045	184.537	98.9163	-0.899627	0.72365	0.995483	no
XLOC_002016	PA0103a	gi|110227054|gb|AE004091.2|:124809-127006	42.1857	32.1884	-0.390213	0.6416	0.995483	no
XLOC_002017	PA0109	gi|110227054|gb|AE004091.2|:131582-131792	677.833	536.602	-0.337079	0.62365	0.995483	no
XLOC_000204	PA0508	gi|110227054|gb|AE004091.2|:569001-570780	71.505	31.0568	-1.20313	0.046	0.995483	no
XLOC_002018	PA0115	gi|110227054|gb|AE004091.2|:135933-136386	64.1015	50.2679	-0.35072	0.6111	0.995483	no
XLOC_002019	PA0123	gi|110227054|gb|AE004091.2|:142358-143267	25.2073	49.9628	0.98701	0.1348	0.995483	no
XLOC_002020	PA0125	gi|110227054|gb|AE004091.2|:143566-144072	125.076	260.662	1.05937	0.329	0.995483	no
XLOC_002020	PA0124	gi|110227054|gb|AE004091.2|:143566-144072	89.3254	134.485	0.590297	0.50815	0.995483	no
XLOC_002021	PA0126	gi|110227054|gb|AE004091.2|:144247-154067	51.1006	35.1522	-0.539727	0.79005	0.995483	no
XLOC_002022	PA0132	gi|110227054|gb|AE004091.2|:144247-154067	0	0	0	1	1	no
XLOC_002022	PA0131	gi|110227054|gb|AE004091.2|:144247-154067	10.78	0	#NAME?	0.1958	0.995483	no
XLOC_002022	PA0130	gi|110227054|gb|AE004091.2|:144247-154067	19.2866	2.34725	-3.03856	0.4777	0.995483	no
XLOC_002022	gabP	gi|110227054|gb|AE004091.2|:144247-154067	40.1378	54.2579	0.434873	0.72535	0.995483	no
XLOC_002023	PA0134	gi|110227054|gb|AE004091.2|:144247-154067	36.6718	62.5262	0.769788	0.6336	0.995483	no
XLOC_000205	PA0522	gi|110227054|gb|AE004091.2|:580315-581925	0.275126	0	#NAME?	1	1	no
XLOC_002024	PA0141	gi|110227054|gb|AE004091.2|:160551-161448	171.81	98.7342	-0.799195	0.16075	0.995483	no
XLOC_002025	PA0144	gi|110227054|gb|AE004091.2|:164442-165069	22.3898	14.9676	-0.580996	0.50065	0.995483	no
XLOC_002026	PA0145	gi|110227054|gb|AE004091.2|:165218-165737	37.5588	38.9183	0.0512982	0.9452	0.995483	no
XLOC_002028	PA0163	gi|110227054|gb|AE004091.2|:182767-186766	60.8802	40.2196	-0.598075	0.6676	0.995483	no
XLOC_002029	PA0172	gi|110227054|gb|AE004091.2|:186801-196814	0	0	0	1	1	no
XLOC_002029	PA0171	gi|110227054|gb|AE004091.2|:186801-196814	21.9524	11.4653	-0.93711	0.7599	0.995483	no
XLOC_002029	PA0170	gi|110227054|gb|AE004091.2|:186801-196814	40.5026	18.0691	-1.16449	0.69625	0.995483	no
XLOC_002029	PA0169	gi|110227054|gb|AE004091.2|:186801-196814	60.9992	76.7129	0.330677	0.73265	0.995483	no
XLOC_002030	PA0173	gi|110227054|gb|AE004091.2|:197010-198060	22.4107	13.5047	-0.730727	0.2895	0.995483	no
[truncated: 3,573 more rows]
